# Supplementary material
Source: PubMed Central journal article supplement (PMC4343179)
Supplement: pnas.1420657112.sapp.pdf [file pnas.1420657112.sapp.pdf]

**Supplementary data S1:  
datasets information**

## List of markers used in this study

| Gene name | Gene description                                    | Refseq ID    | Marker used in        |                       | Number of conserved positions |               |
|-----------|-----------------------------------------------------|--------------|-----------------------|-----------------------|-------------------------------|---------------|
|           |                                                     |              | Derelle and Lang 2012 | He <i>et al.</i> 2014 | ALPHA-PROT dataset            | EUBAC dataset |
| atp3      | ATP synthase F1 subunit gamma                       | NP_001001973 | X                     |                       | 84                            | --            |
| cox11     | Protein involved in heme biosynthesis               | NP_004366    | X                     |                       | 110                           | --            |
| grpE      | Mitochondrial cochaperone grpE                      | NP_079472    | X                     |                       | 60                            | --            |
| HslVU     | Heat shock protein HslVU                            | XP_636662    | X                     |                       | 264                           | --            |
| Hsp78     | Mitochondrial Hsp 78                                | XP_636444    | X                     |                       | 544                           | --            |
| mHsp60    | Mitochondrial Hsp 60 kDa                            | NP_002147    | X                     |                       | 434                           | --            |
| mrl3      | Mitochondrial ribosomal protein L3                  | NP_009139    | X                     |                       | 95                            | --            |
| mtif2     | Translation initiation factor IF-2                  | NP_002444    | X                     |                       | 146                           | --            |
| nad7      | NADH dehydrogenase subunit 7                        | NP_004541    | X                     |                       | 358                           | --            |
| nad8      | NADH dehydrogenase subunit 8                        | NP_002487    | X                     |                       | 119                           | --            |
| nad10     | NADH dehydrogenase subunit 10                       | NP_077718    | X                     |                       | 133                           | --            |
| nad11     | NADH dehydrogenase subunit 11                       | NP_004997    | X                     |                       | 290                           | --            |
| ndufv1    | NADH dehydrogenase flavoprotein 1                   | NP_001159574 | X                     |                       | 397                           | --            |
| ndufv2    | NADH dehydrogenase flavoprotein 2                   | NP_066552    | X                     |                       | 75                            | --            |
| odpB      | Pyruvate dehydrogenase E1 component, beta sub.      | NP_000916    | X                     |                       | 276                           | --            |
| sdh2      | Succinate dehydrogenase subunit 2                   | NP_002991    | X                     |                       | 177                           | --            |
| CLPP      | Caseinolytic peptidase, proteolytic subunit         | NP_006003    |                       |                       | 168                           | --            |
| ETFDH     | Electron-transferring-flavoprotein dehydrogenase    | NP_004444    |                       |                       | 320                           | --            |
| ndufaf5   | NADH dehydrogenase complex I, assembly factor 5     | NP_077025    |                       |                       | 102                           | --            |
| NifU      | Iron-sulfur cluster scaffold homolog, mitochondrial | NP_056515    |                       |                       | 104                           | --            |
| PCCA      | Propionyl CoA carboxylase, alpha polypeptide        | NP_000273    |                       |                       | 388                           | --            |
| PCCB      | Propionyl CoA carboxylase, beta polypeptide         | NP_000523    |                       |                       | 424                           | --            |
| PET112    | glutamyl-tRNA amidotransferase subunit B            | NP_004555    |                       |                       | 198                           | --            |
| TypA      | Tyrosine phosphorylated protein A                   | XP_643254    |                       |                       | 313                           | --            |
| atp1      | ATP synthase F1 subunit alpha                       | NP_001001937 | X                     | X                     | 409                           |               |
| atp2      | ATP synthase F1 subunit beta                        | NP_001677    | X                     | X                     | 428                           |               |
| cytc1     | Cytochrome c1                                       | NP_001907    | X                     | X                     | 134                           |               |
| DLDH      | Dihydrolipoyl dehydrogenase                         | NP_000099    | X                     | X                     | 313                           |               |
| DLST      | Dihydrolipoamide S-succinyltransferase              | NP_001924    | X                     | X                     | 234                           |               |
| etfB      | Electron transfer flavoprotein, beta subunit        | NP_001976    | X                     | X                     | 141                           |               |
| mHsp70    | Mitochondrial Hsp 70 kDa                            | NP_004125    | X                     | X                     | 492                           |               |
| nsf1      | Cysteine desulfurase, mitochondrial                 | NP_066923    | X                     | X                     | 290                           |               |
| odpA      | Pyruvate dehydrogenase E1 component, alpha sub.     | NP_005381    | X                     | X                     | 199                           |               |
| sdh1      | Succinate dehydrogenase subunit 1                   | NP_004159    | X                     | X                     | 484                           |               |
| SUCLG1    | SuccinylCoA ligase, alpha subunit                   | NP_003840    | X                     | X                     | 248                           |               |
| tufA      | Translation elongation factor Tu                    | NP_003312    | X                     | X                     | 324                           |               |
| ndufa9    | NADH dehydrogenase 1 alpha subcomplex, 9            | NP_004993    |                       | X                     | 82                            |               |
| UQCRC1    | Mitochondrial-processing peptidase subunit beta     | NP_004270    |                       | X                     | 198                           |               |
| UQCRFS1   | Cytochrome b-c1 complex subunit Rieske              | NP_005994    |                       | X                     | 86                            |               |
| prot_10   | ATP-dependent molecular chaperone HSC82             | NP_523899    |                       | X                     | --                            | 495           |
| prot_11   | Cytosolic Fe-S cluster assembly factor NBP35        | NP_002475    |                       | X                     | --                            | 122           |
| prot_13   | Aspartyl aminopeptidase 4                           | NP_036232    |                       | X                     | --                            | 200           |
| prot_14   | 2-oxoglutarate dehydrogenase                        | NP_060715    |                       | X                     | --                            | 433           |
| prot_15   | Ribonucleoside-diphosphate reductase large chain 1  | NP_001024    |                       | X                     | --                            | 551           |
| prot_17   | Protoheme IX farnesyltransferase                    | NP_001294    |                       | X                     | --                            | 97            |
| prot_18   | Respiratory chain complexes assembly YTA12          | NP_006787    |                       | X                     | --                            | 330           |
| prot_21   | Adenylate kinase 1                                  | NP_037543    |                       | X                     | --                            | 145           |
| prot_24   | ATP-dependent RNA helicase PRP43                    | NP_001349    |                       | X                     | --                            | 427           |
| prot_25   | Dihydrolipoyllysine-residue acetyltransferase       | NP_001922    |                       | X                     | --                            | 140           |
| prot_26   | methylcrotonoyl-CoA carboxylase beta chain          | NP_071415    |                       | X                     | --                            | 361           |
| prot_32   | Aminomethyltransferase                              | NP_000472    |                       | X                     | --                            | 121           |
| prot_33   | Glycerol-3-phosphate dehydrogenase                  | NP_001076581 |                       | X                     | --                            | 187           |
| prot_34   | Branched-chain-amino-acid aminotransferase          | NP_001171564 |                       | X                     | --                            | 137           |
| prot_35   | Protein SCO2                                        | NP_004580    | X                     | X                     | --                            | 67            |
| prot_36   | Isocitrate dehydrogenase subunit 2                  | NP_005521    |                       | X                     | --                            | 263           |
| prot_37   | Iron-sulfur clusters transporter ATM1               | NP_004290    |                       | X                     | --                            | 342           |
| prot_4    | Elongation factor G1                                | NP_079272    |                       | X                     | --                            | 404           |
| prot_5    | S-adenosylmethionine synthase 1                     | NP_005902    |                       | X                     | --                            | 280           |
| prot_6    | Pyruvate kinase 1                                   | XP_639190    |                       | X                     | --                            | 243           |
| prot_7    | Threonyl tRNA synthetase                            | NP_689508    |                       | X                     | --                            | 305           |
| prot_9    | Aspartate aminotransferase                          | NP_002071    |                       | X                     | --                            | 250           |

## List of species used in this study

|                                 | Species                               | Origin of data                                                            | % data             |               |
|---------------------------------|---------------------------------------|---------------------------------------------------------------------------|--------------------|---------------|
|                                 |                                       |                                                                           | ALPHA-PROT dataset | EUBAC dataset |
| EUKARYOTA                       | <i>Karenia brevis</i>                 | CAMERA 2.0 portal                                                         | 51.7               | 66.9          |
|                                 | <i>Lingulodinium polyedrum</i>        | CAMERA 2.0 portal                                                         | 50.6               | 33.6          |
|                                 | <i>Perkinsus marinus</i>              | NCBI Refseq                                                               | 53.8               | 76.5          |
|                                 | <i>Plasmodium falciparum</i>          | NCBI Refseq                                                               | 46.0               | 73.7          |
|                                 | <i>Toxoplasma gondii</i>              | NCBI Refseq                                                               | 56.8               | 90.6          |
|                                 | <i>Oxytricha trifallax</i>            | NCBI Refseq                                                               | 76.4               | 84.3          |
|                                 | <i>Paramecium tetraurelia</i>         | NCBI Refseq                                                               | 74.5               | 94.2          |
|                                 | <i>Platyophrya macrostoma</i>         | CAMERA 2.0 portal                                                         | 63.8               | 38.1          |
|                                 | <i>Tetrahymena thermophila</i>        | NCBI Refseq                                                               | 73.7               | 93.3          |
|                                 | <i>Acanthamoeba castellanii</i>       | NCBI Refseq                                                               | 93.6               | 81.8          |
|                                 | <i>Dictyostelium discoideum</i>       | NCBI Refseq                                                               | 93.5               | 95.8          |
|                                 | <i>Filamoeba nolandi</i>              | CAMERA 2.0 portal                                                         | 77.4               | 84.4          |
|                                 | <i>Physarum polycephalum</i>          | NCBI Refseq                                                               | 71.0               | 60.3          |
|                                 | <i>Polysphondylium pallidum</i>       | NCBI Refseq                                                               | 92.4               | 94.0          |
|                                 | <i>Stereomyxa ramosa</i>              | CAMERA 2.0 portal                                                         | 77.1               | 85.6          |
|                                 | <i>Collodictyon triciliatum</i>       | Zhao <i>et al.</i> 2013 dataset                                           | 62.0               | 36.2          |
|                                 | <i>Thecamonas trahens</i>             | BROAD Institute                                                           | 76.6               | 91.0          |
|                                 | <i>Cryptomonas paramecium</i>         | CAMERA 2.0 portal                                                         | 68.4               | 76.8          |
|                                 | <i>Goniomonas avonlea</i>             | <b>new data</b>                                                           | 77.1               | 71.1          |
|                                 | <i>Guillardia theta</i>               | JGI                                                                       | 83.8               | 88.1          |
|                                 | <i>Acrasis kona</i>                   | He <i>et al.</i> 2014 dataset                                             | 35.5               | 82.2          |
|                                 | <i>Eutreptiella gymnastica</i>        | CAMERA 2.0 portal                                                         | 71.1               | 35.0          |
|                                 | <i>Leishmania major</i>               | NCBI Refseq                                                               | 79.3               | 80.9          |
|                                 | <i>Naegleria gruberi</i>              | NCBI Refseq                                                               | 89.4               | 93.9          |
|                                 | <i>Andalucia godoyi</i>               | <b>new data</b>                                                           | 96.4               | 99.0          |
|                                 | <i>Jakoba libera</i>                  | TBestDB + NCBI                                                            | 40.6               | 34.1          |
|                                 | <i>Reclinomonas americana</i>         | TBestDB + NCBI                                                            | 44.6               | 44.7          |
|                                 | <i>Seculamonas ecuadoriensis</i>      | TBestDB + NCBI                                                            | 37.6               | 48.5          |
|                                 | <i>Malawimonas californiana</i>       | <b>new data</b>                                                           | 95.1               | 87.3          |
|                                 | <i>Malawimonas jakobiformis</i>       | <b>new data</b>                                                           | 95.7               | 84.5          |
|                                 | <i>Batrachochytrium dendrobatidis</i> | JGI                                                                       | 91.9               | 96.5          |
|                                 | <i>Gonapodya prolifera</i>            | JGI                                                                       | 82.4               | 84.2          |
|                                 | <i>Mortierella verticillata</i>       | BROAD Institute                                                           | 93.9               | 96.5          |
|                                 | <i>Phanerochaete chrysosporium</i>    | JGI                                                                       | 80.0               | 36.3          |
|                                 | <i>Rhizopus oryzae</i>                | BROAD Institute                                                           | 93.6               | 97.2          |
|                                 | <i>Spizellomyces punctatus</i>        | JGI                                                                       | 93.7               | 97.5          |
|                                 | <i>Tuber melanosporum</i>             | NCBI Refseq                                                               | 80.6               | 37.7          |
|                                 | <i>Ustilago maydis</i>                | NCBI Refseq                                                               | 76.4               | 92.2          |
|                                 | <i>Yarrowia lipolytica</i>            | NCBI Refseq                                                               | 83.5               | 97.5          |
|                                 | <i>Acropora digitifera</i>            | <a href="http://marinegenomics.oist.jp">http://marinegenomics.oist.jp</a> | 71.5               | 86.0          |
|                                 | <i>Amphimedon queenslandica</i>       | NCBI Refseq                                                               | 84.7               | 91.7          |
|                                 | <i>Capsaspora owczarzaki</i>          | BROAD Institute                                                           | 91.5               | 91.6          |
|                                 | <i>Ephydatia muelleri</i>             | Compagen                                                                  | 86.1               | 96.6          |
|                                 | <i>Homo sapiens</i>                   | NCBI Refseq                                                               | 88.3               | 97.5          |
|                                 | <i>Lottia gigantea</i>                | JGI                                                                       | 84.4               | 95.0          |
|                                 | <i>Monosiga brevicollis</i>           | NCBI Refseq                                                               | 84.7               | 78.1          |
|                                 | <i>Monosiga ovata</i>                 | NCBI dB EST                                                               | 67.2               | 62.2          |
|                                 | <i>Nematostella vectensis</i>         | NCBI Refseq                                                               | 85.7               | 93.4          |
|                                 | <i>Salpingoeca rosetta</i>            | BROAD Institute                                                           | 86.8               | 92.1          |
|                                 | <i>Bigelowiella natans</i>            | JGI                                                                       | 91.2               | 82.8          |
|                                 | <i>Chondrus crispus</i>               | NCBI Refseq                                                               | 78.0               | 92.6          |
|                                 | <i>Galdieria sulphuraria</i>          | NCBI Refseq                                                               | 92.8               | 91.8          |
|                                 | <i>Aplanochytrium kerguelense</i>     | JGI                                                                       | 94.0               | 88.6          |
|                                 | <i>Schizochytrium aggregatum</i>      | JGI                                                                       | 91.0               | 92.4          |
|                                 | <i>Phytophthora infestans</i>         | NCBI Refseq                                                               | 94.1               | 91.3          |
|                                 | <i>Saprolegnia parasitica</i>         | BROAD Institute                                                           | 94.9               | 92.2          |
| <i>Bolidomonas pacifica</i>     | CAMERA 2.0 portal                     | 80.8                                                                      | 93.9               |               |
| <i>Ectocarpus siliculosus</i>   | NCBI Refseq                           | 87.3                                                                      | 86.1               |               |
| <i>Thalassiosira pseudonana</i> | NCBI Refseq                           | 95.8                                                                      | 87.1               |               |
| <i>Heterosigma akashiwo</i>     | CAMERA 2.0 portal                     | 76.2                                                                      | 77.3               |               |
| <i>Chlorella variabilis</i>     | JGI                                   | 74.6                                                                      | 89.5               |               |

|                                  |                              |                   |        |        |
|----------------------------------|------------------------------|-------------------|--------|--------|
|                                  | Micromonas sp                | NCBI Refseq       | 79.0   | 89.1   |
|                                  | Ostreococcus lucimarinus     | JGI               | 71.7   | 88.1   |
|                                  | Tetraselmis astigmatica      | CAMERA 2.0 portal | 75.6   | 86.5   |
|                                  | Arabidopsis thaliana         | NCBI Refseq       | 74.9   | 94.4   |
|                                  | Oryza sativa                 | NCBI Refseq       | 80.8   | 97.1   |
|                                  | Physcomitrella patens        | NCBI Refseq       | 83.7   | 99.9   |
| ALPHA-PROTEOBACTERIA<br>OUTGROUP | Maricaulis maris             | NCBI Refseq       | 88.9   | --     |
|                                  | Parvularcula bermudensis     | NCBI Refseq       | 84.9   | --     |
|                                  | Parvibaculum lavamentivorans | NCBI Refseq       | 96.6   | --     |
|                                  | Starkeya novella             | NCBI Refseq       | 96.7   | --     |
|                                  | Azospirillum sp              | NCBI Refseq       | 93.6   | --     |
|                                  | Rhodospirillum centenum      | NCBI Refseq       | 90.3   | --     |
|                                  | Roseomonas cervicalis        | NCBI Refseq       | 91.1   | --     |
|                                  | Granulibacter bethesdensis   | NCBI Refseq       | 87.8   | --     |
|                                  | Magnetospirillum magneticum  | NCBI Refseq       | 99.8   | --     |
|                                  | Rhodospirillum rubrum        | NCBI Refseq       | 95.7   | --     |
|                                  | Magnetococcus sp             | NCBI Refseq       | 73.5   | --     |
| EUBACTERIA<br>OUTGROUP           | Solibacter usitatus          | NCBI Refseq       | --     | 61.1   |
|                                  | Agrobacterium tumefaciens    | NCBI Refseq       | --     | 87.0   |
|                                  | Magnetospirillum magneticum  | NCBI Refseq       | --     | 80.1   |
|                                  | Pelagibacter ubique          | NCBI Refseq       | --     | 52.7   |
|                                  | Puniceispirillum marinum     | NCBI Refseq       | --     | 67.3   |
|                                  | Rhodopirellula baltica       | NCBI Refseq       | --     | 81.7   |
|                                  | Rickettsia conorii           | NCBI Refseq       | --     | 68.3   |
|                                  | Burkholderia ambifaria       | NCBI Refseq       | --     | 86.9   |
|                                  | Desulfovibrio vulgaris       | NCBI Refseq       | --     | 59.9   |
|                                  | Geobacter metallireducens    | NCBI Refseq       | --     | 68.0   |
|                                  | Escherichia coli             | NCBI Refseq       | --     | 79.2   |
|                                  | Myxococcus xanthus           | NCBI Refseq       | --     | 72.2   |
|                                  | Planctomyces limnophilus     | NCBI Refseq       | --     | 70.2   |
| AVERAGE                          |                              |                   | 79.8 % | 79.8 % |

### **Removal of fast evolving sites**

We performed a removal of fast evolving sites from both matrices using a tree independent approach (i.e. the evolutionary rate of each sites were estimated without reference phylogenetic tree) and with a stopping criterion derived from Goremykin *et al.* 2010.

In practice, we applied the following successive steps:

\_ Evolutionary rates of each sites were estimated by their similarity score calculated by trimAl (Capella-Gutiérrez, Silla-Martínez and Gabaldón 2009).

\_ Fast-evolving sites were repeatedly removed from the original matrices with a 1% increment. At each shortening step ( $n$ ), 2 partitions were created: the shortened alignment (referred to hereafter as  $A_n$ ) and all deleted positions (referred to hereafter as  $B_n$ ).

\_ Species that have more than 30% of missing data in the two original matrices were removed from all  $A_n$  and  $B_n$  alignments (because missing data affect corrected distances calculated from short alignments).

\_ The best evolutionary model were estimated using ProtTest (option '-S 1'; Darriba *et al.* 2011) for each  $A_n$  and  $B_n$  alignments

\_ Pair-wise ML distances were calculated from all  $A_n$  and  $B_n$  alignments using RAxML (option '-f x'; Stamatakis 2006) under their corresponding evolutionary models.

\_ At each shortening step, pair-wise ML distances inferred from  $A_n$  and  $B_n$  alignments were compared by calculating the Pearson product-moment correlation coefficient. Results are shown in the two graphics below.

\_ For each matrices, the best shortening step corresponds to the step where the Pearson product-moment correlation coefficient reach a plateau (gray bars in the two graphics below)

Pearson  
product-moment  
correlation coefficient

### ALPHA-PROT dataset

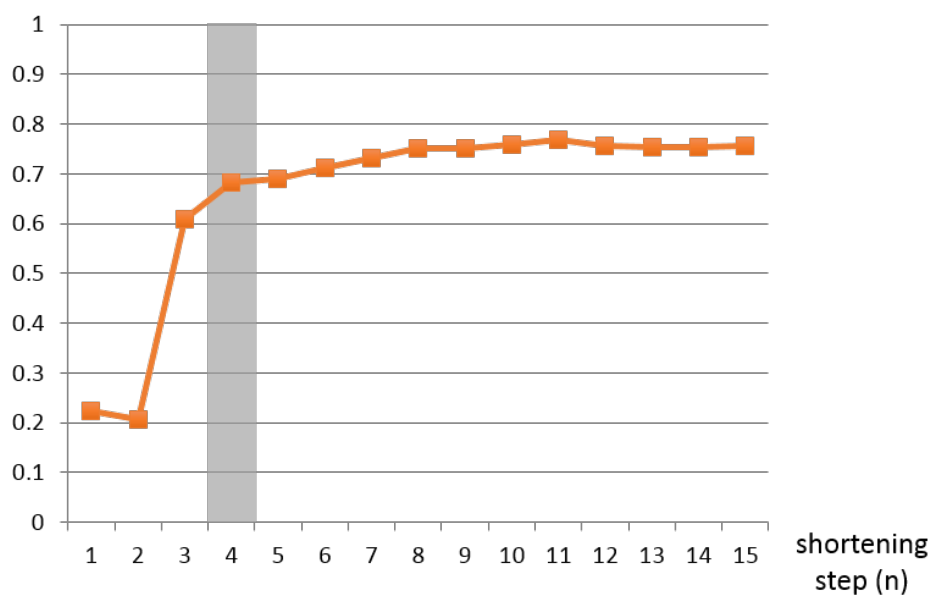

Pearson  
product-moment  
correlation coefficient

### EUBAC dataset

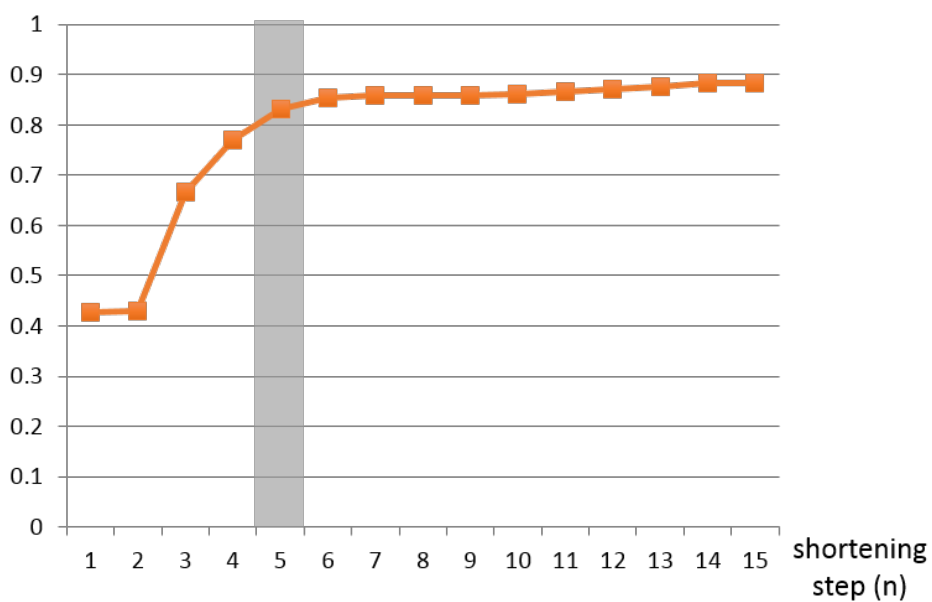

**Saturation plot of the two datasets analyzed in this study**

Saturation plots of the ALPHA-PROT (blue dots and blue regression line) and EUBAC (black dots and black regression line) datasets. See Supplementary Material for method details.

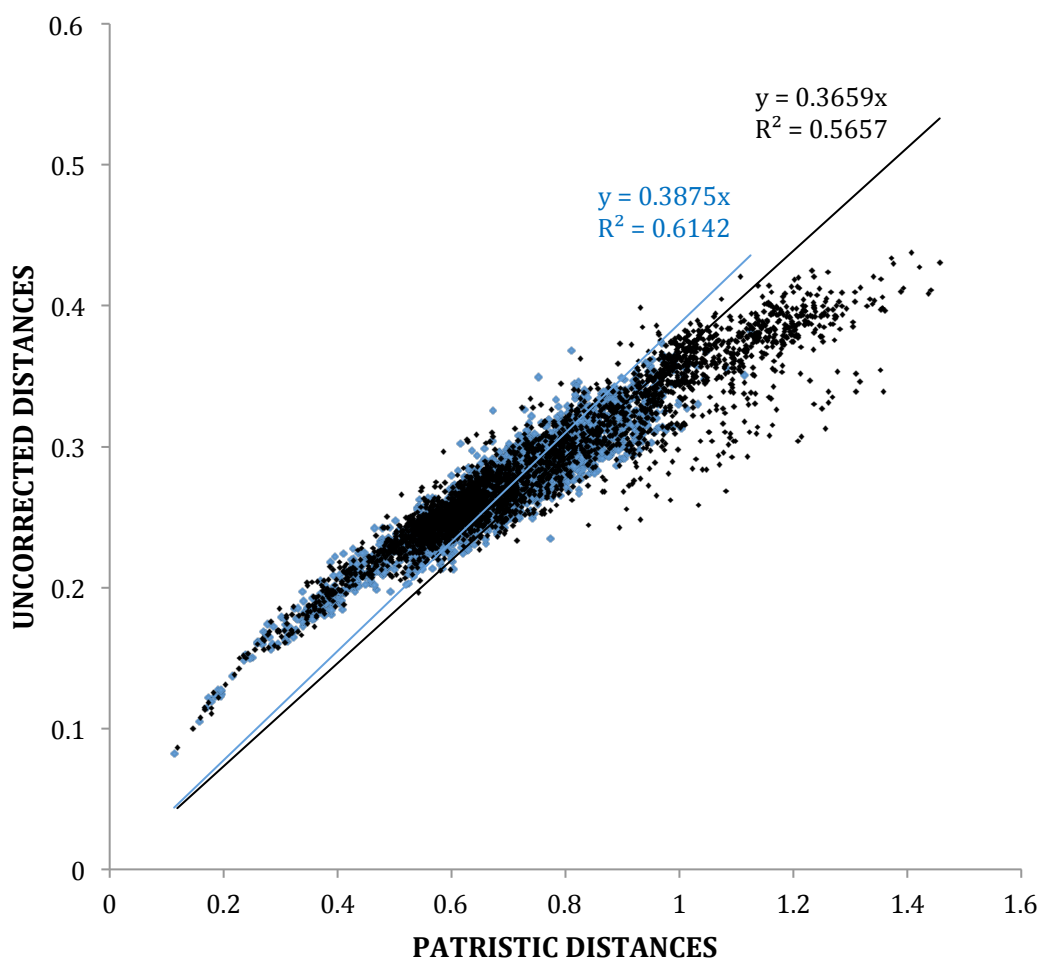

**Saturation plot of the EUBAC and He *et al.* 2014 datasets**

Saturation plots of the EUBAC dataset analyzed in this study (black dots and black regression line) and the EUBAC dataset analyzed in He *et al.* 2014 (blue dots and blue regression line) datasets. See Supplementary Material for method details.

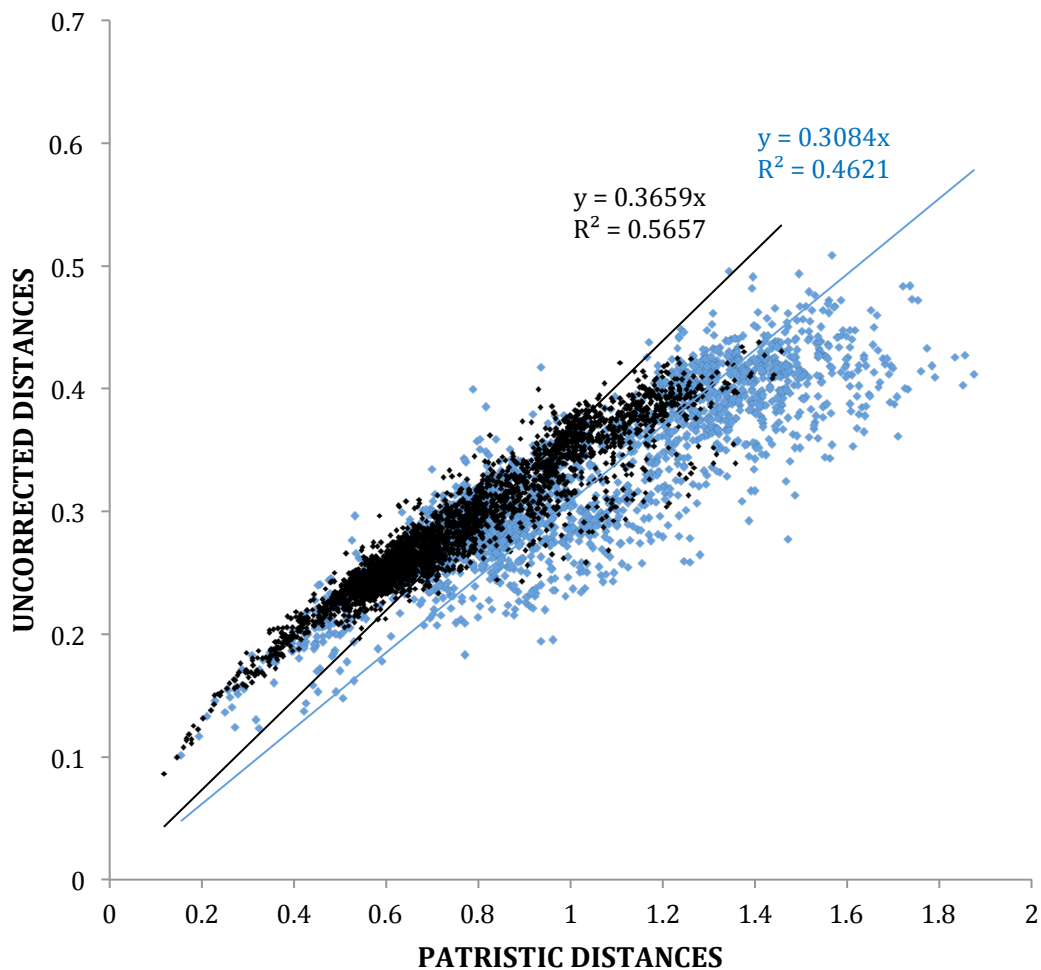



### Principal component analysis of amino-acid frequencies of the ALPHA-PROT dataset

The contribution of each axis are 32% and 11% for the X-axis and the Y-axis respectively.

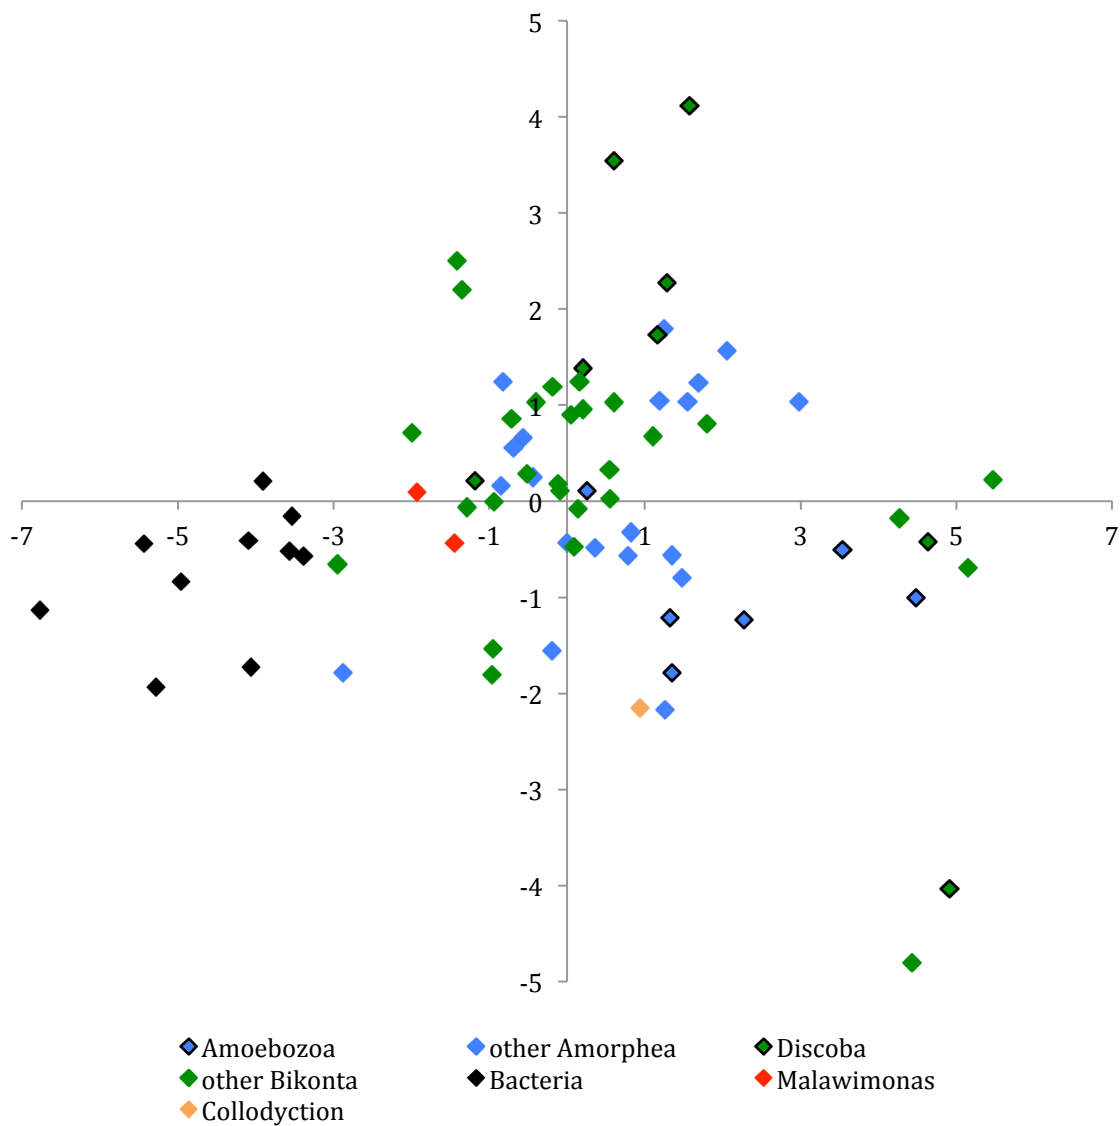

### **Principal component analysis of amino-acid frequencies of the EUBAC dataset**

The contribution of each axis are 31% and 17% for the X-axis and the Y-axis respectively.

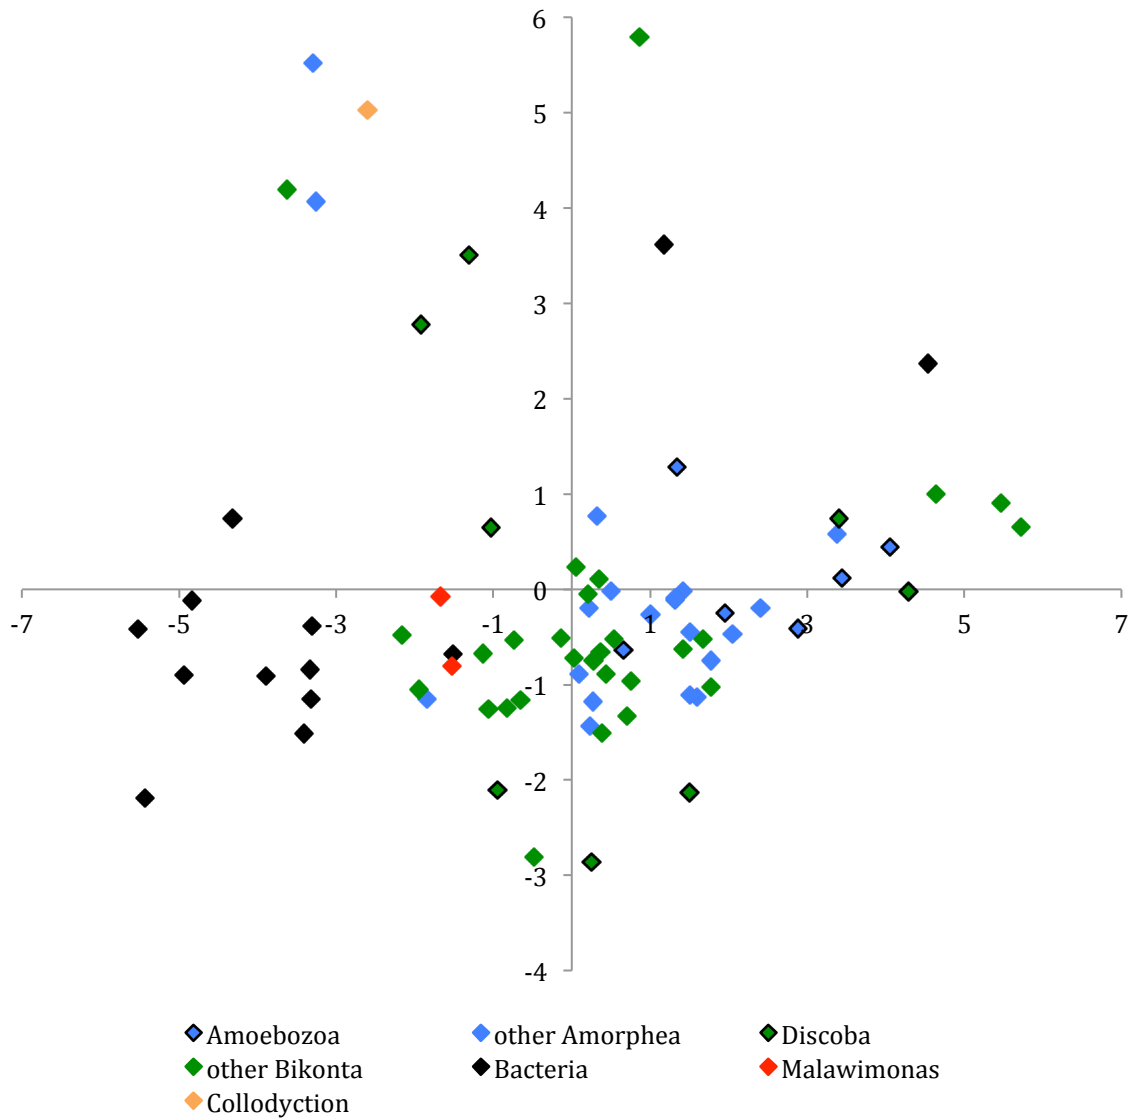

**Supplementary data S2:**  
**outparalogs found in He *et al.* 2014**  
**dataset**

### **List of outparalogs found in He *et al.* 2014 dataset**

| marker     | outparalogs                                                                                                                   |
|------------|-------------------------------------------------------------------------------------------------------------------------------|
| Protein 6  | _ all opisthokonts                                                                                                            |
| Protein 7  | _ <i>Seculamonas ecuadoriensis</i><br>_ <i>Acanthamoeba</i>                                                                   |
| Protein 9  | _ <i>Seculamonas ecuadoriensis</i>                                                                                            |
| Protein 11 | _ <i>Euglena gracilis</i>                                                                                                     |
| Protein 14 | _ <i>Jakoba bahamiensis</i><br>_ <i>Seculamonas ecuadoriensis</i>                                                             |
| Protein 24 | _ <i>Naegleria gruberi</i><br>_ <i>Reclinomonas Americana</i><br>_ <i>Seculamonas ecuadoriensis</i><br>_ <i>Jakoba libera</i> |

The following RAxML trees show, for each of these six phylogenetic markers, the eukaryotic orthologous group used by He *et al.* 2014.

Paralogous group(s) are highlighted in orange and outparalogs detected in the He *et al.* 2014 dataset are highlighted in red.

The taxonomic sampling of paralogous groups has been reduced (we only kept few species representing most of eukaryotic supergroups). Alignments have been created and analyzed following the methods described in Materials and Methods.

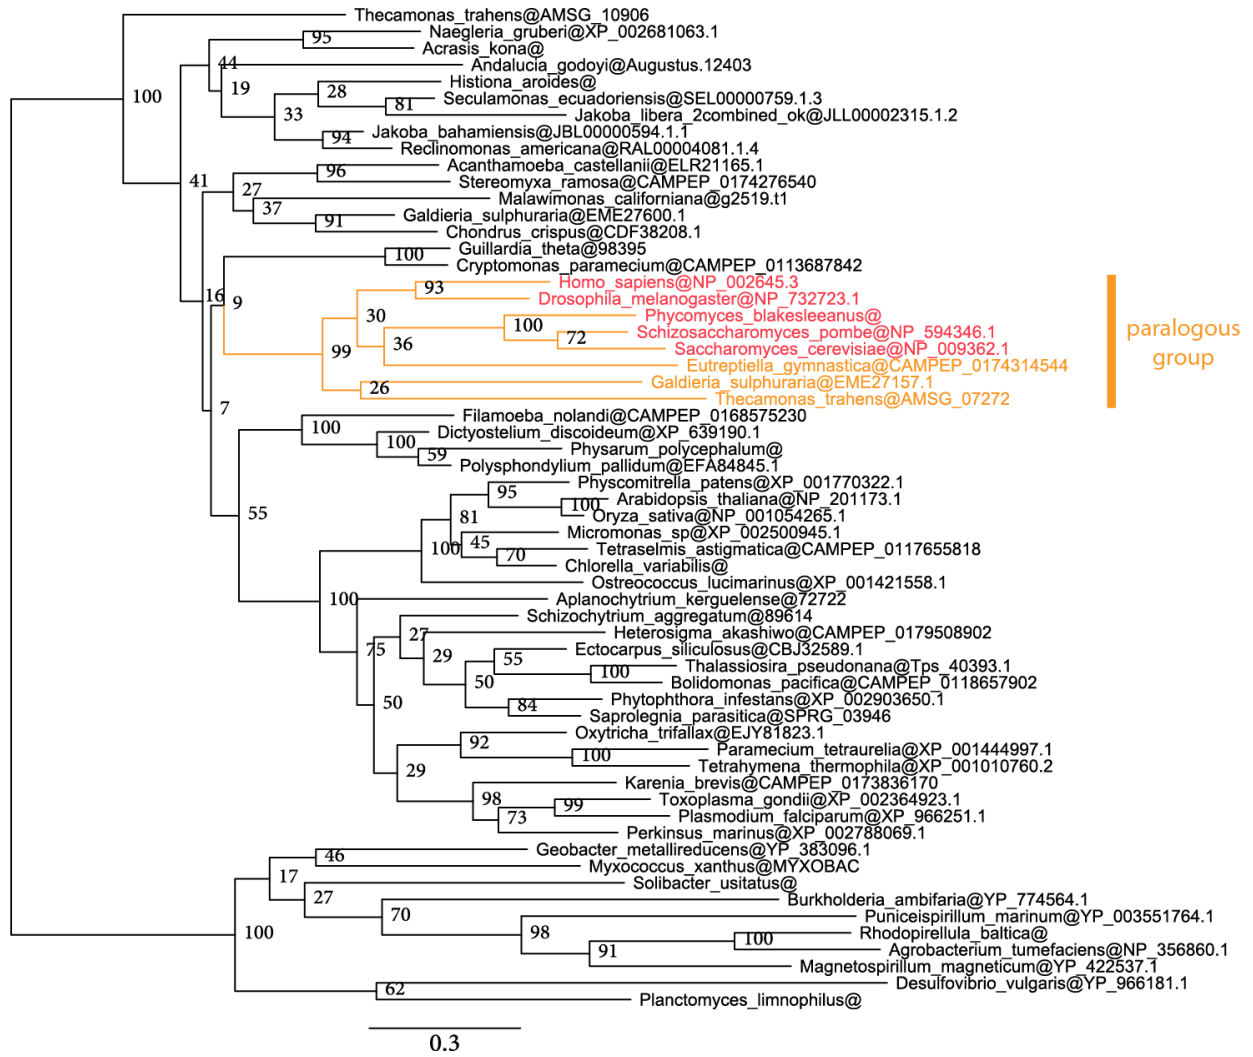

RAxML tree (LG model; 100 bootstrap replicates) obtained from the EUBAC marker **Protein 6** (325 positions).

Only a few representatives of opisthokonts have been kept in the alignment.

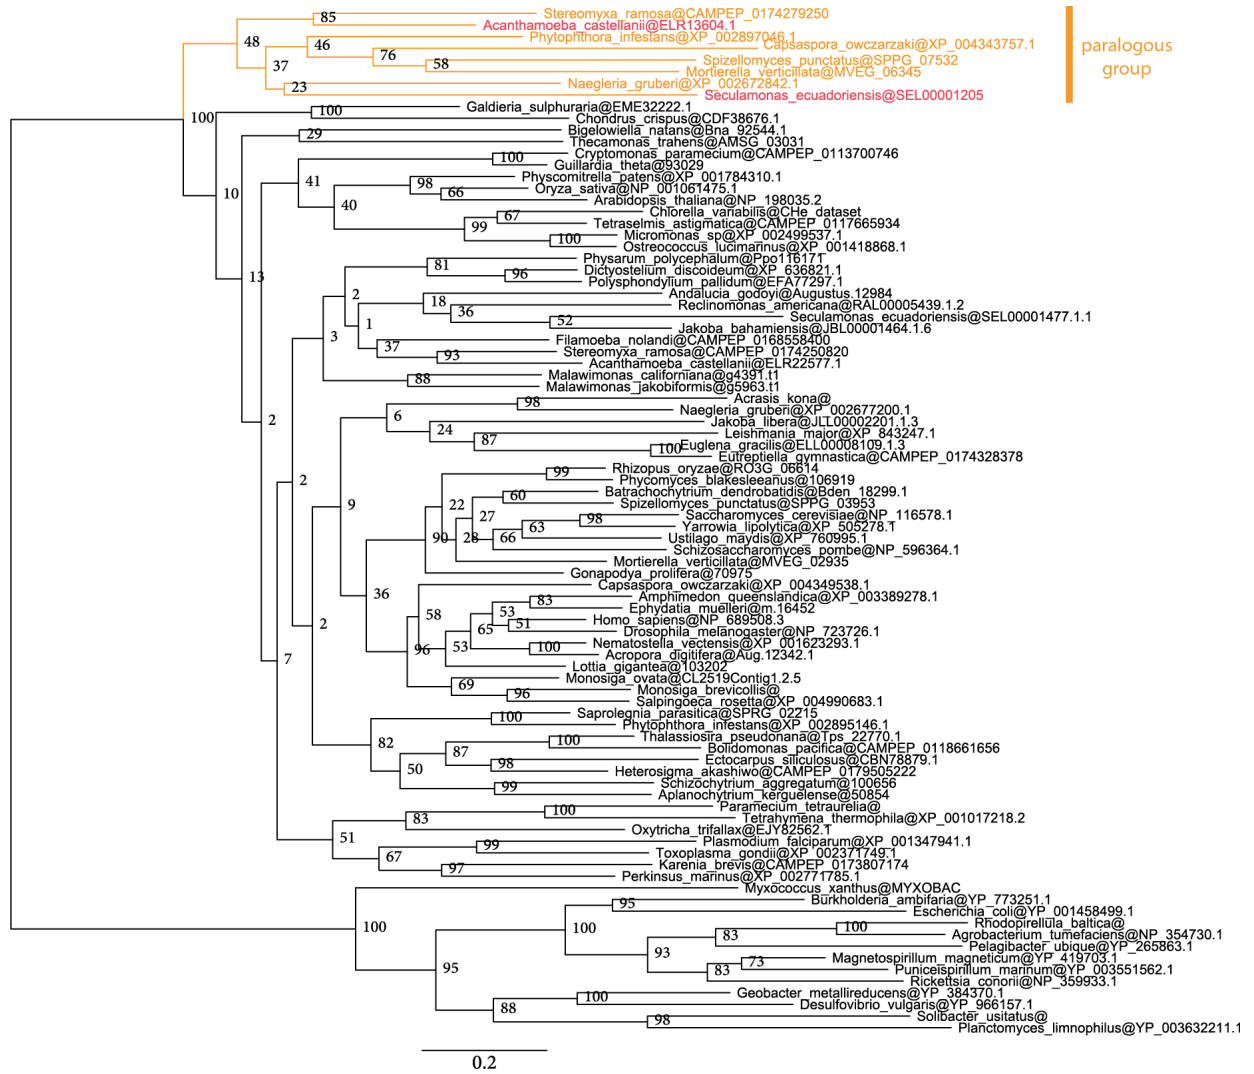

RAxML tree (LG model; 100 bootstrap replicates) obtained from the EUBAC marker **Protein 7** (520 positions).

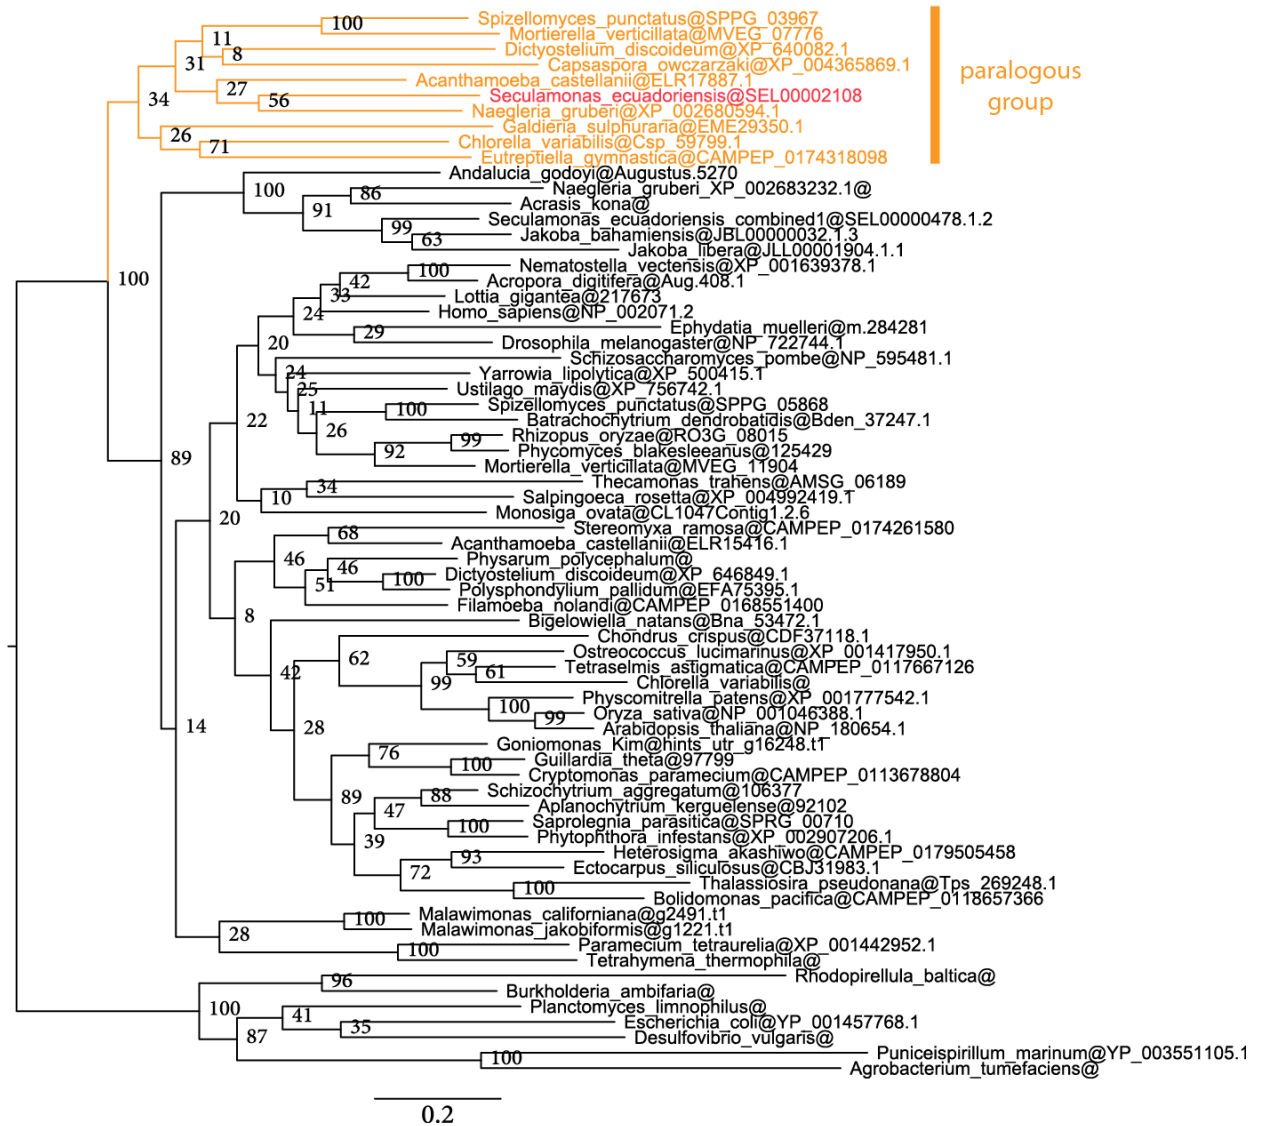

RAxML tree (LG model; 100 bootstrap replicates) obtained from the EUBAC marker **Protein 9** (357 positions).

The two *S. ecuadoriensis* sequences (the ortholog SEL00000478 and the outparalog SEL00002108) have been combined into a chimeric sequence in He *et al.* 2014.

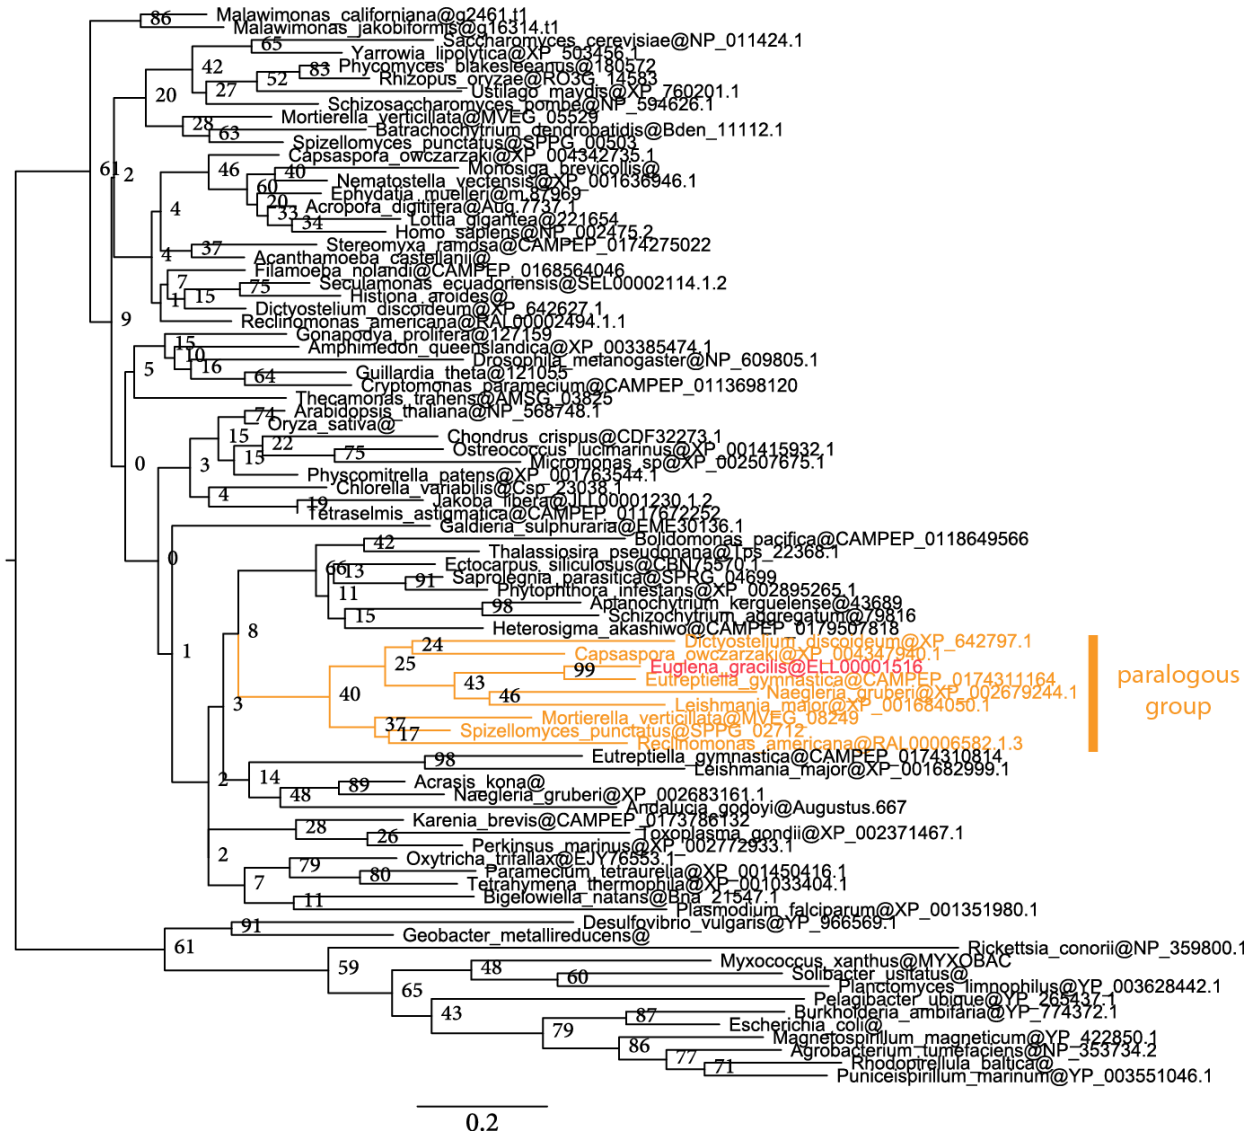

RAxML tree (LG model; 100 bootstrap replicates) obtained from the EUBAC marker **Protein 11** (176 positions).



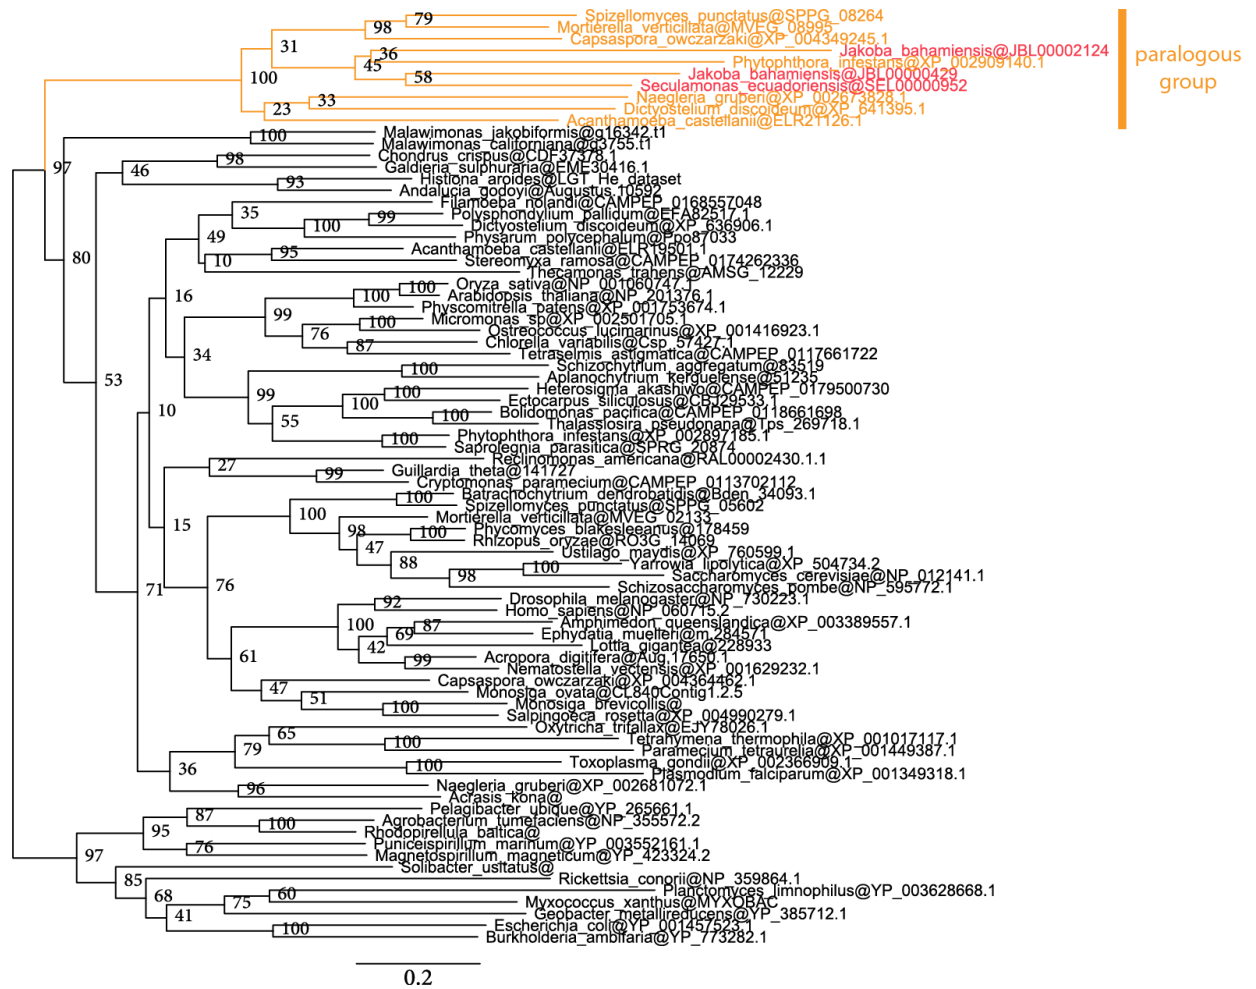

RAxML tree (LG model; 100 bootstrap replicates) obtained from the EUBAC marker **Protein 14** (668 positions).

The two *J. bahamiensis* outparalogs have been combined into a chimeric sequence in He *et al.* 2014.

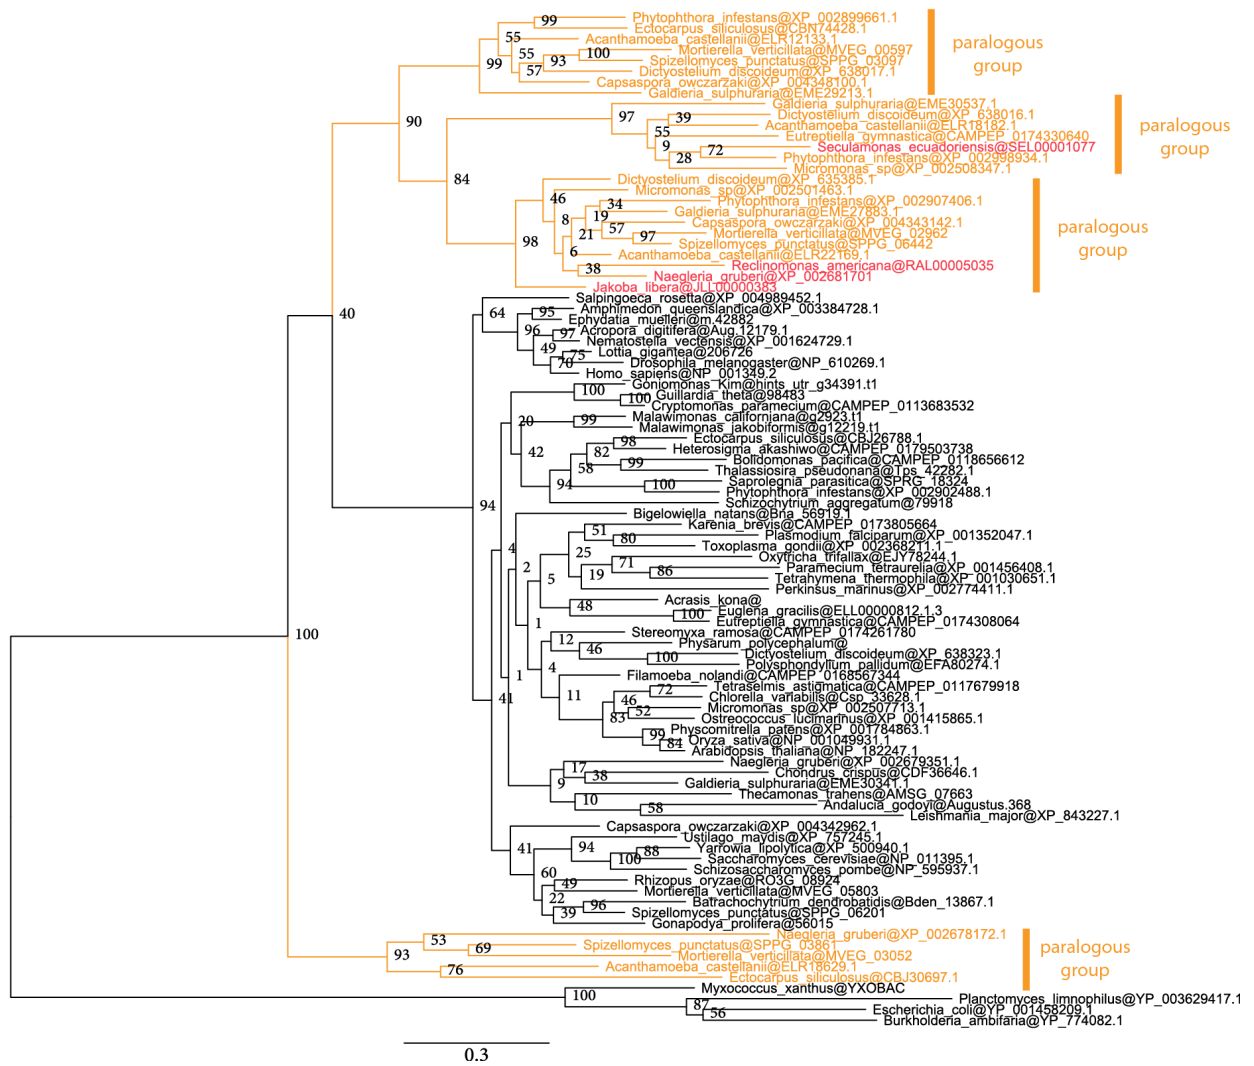

RAxML tree (LG model; 100 bootstrap replicates) obtained from the EUBAC marker **Protein 24** (554 positions).

**Supplementary data S3:**  
**phylogenetic trees**

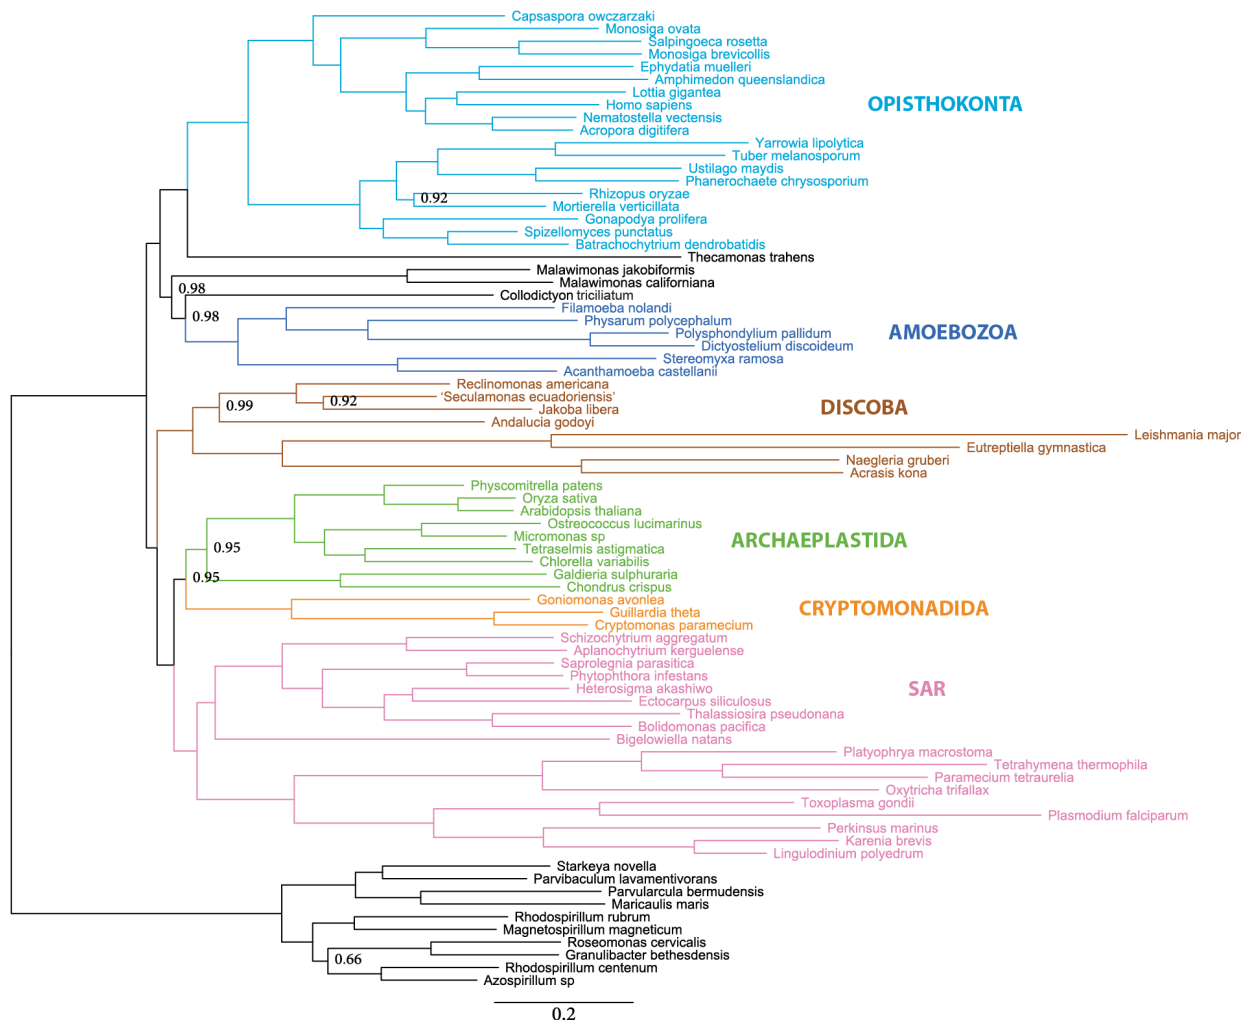

Bayesian consensus tree obtained from the **ALPHA-PROT** dataset under the **CAT-GTR +  $\Gamma$ 4** model. Branch support values equal to 1 are not displayed.

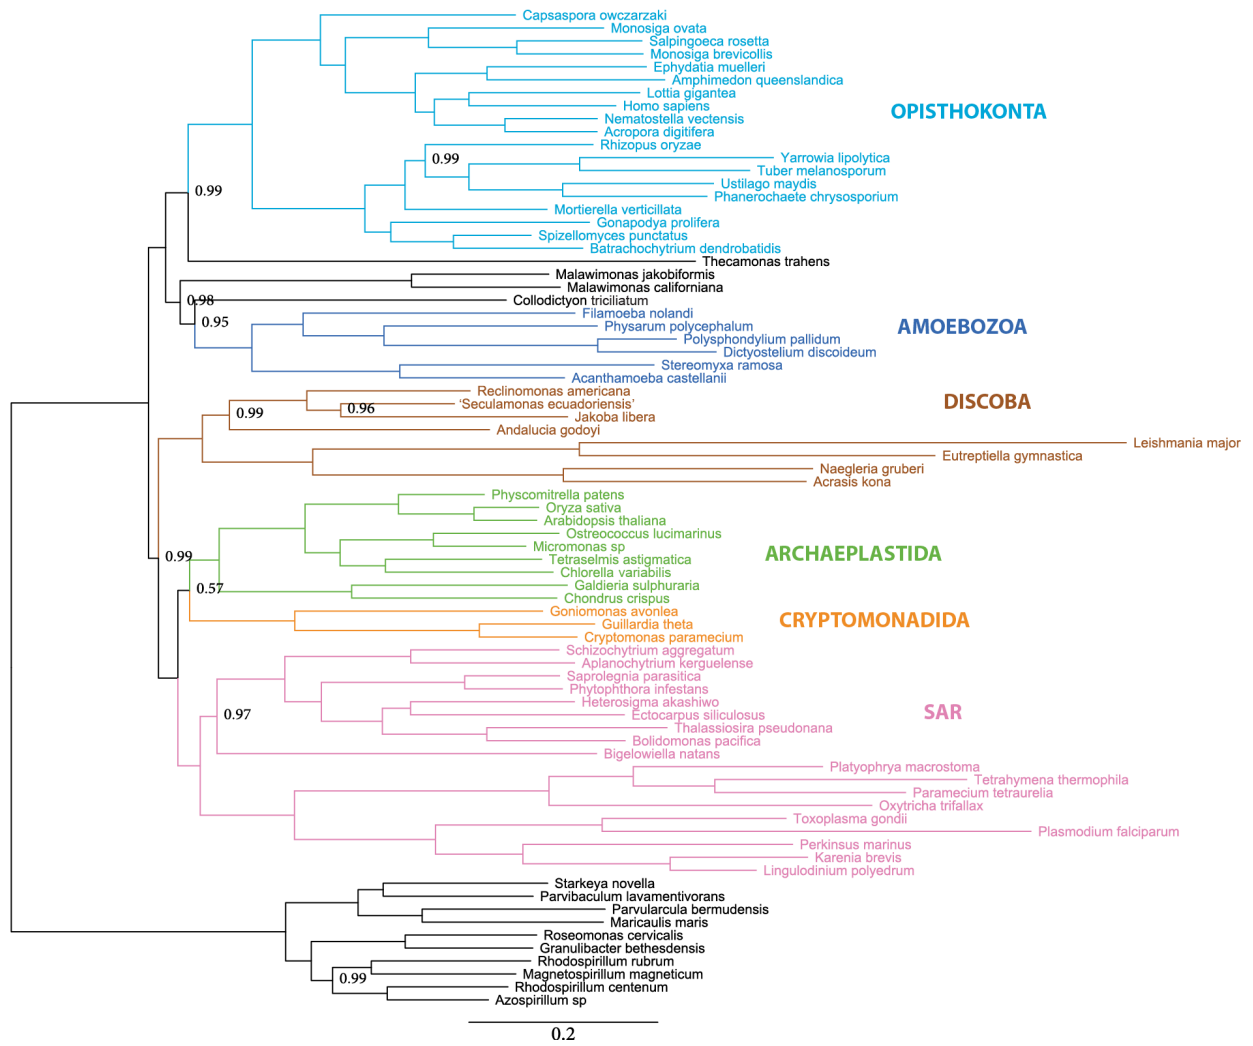

Bayesian consensus tree obtained from the **ALPHA-PROT** dataset under the **CAT + F4** model. Branch support values equal to 1 are not displayed.

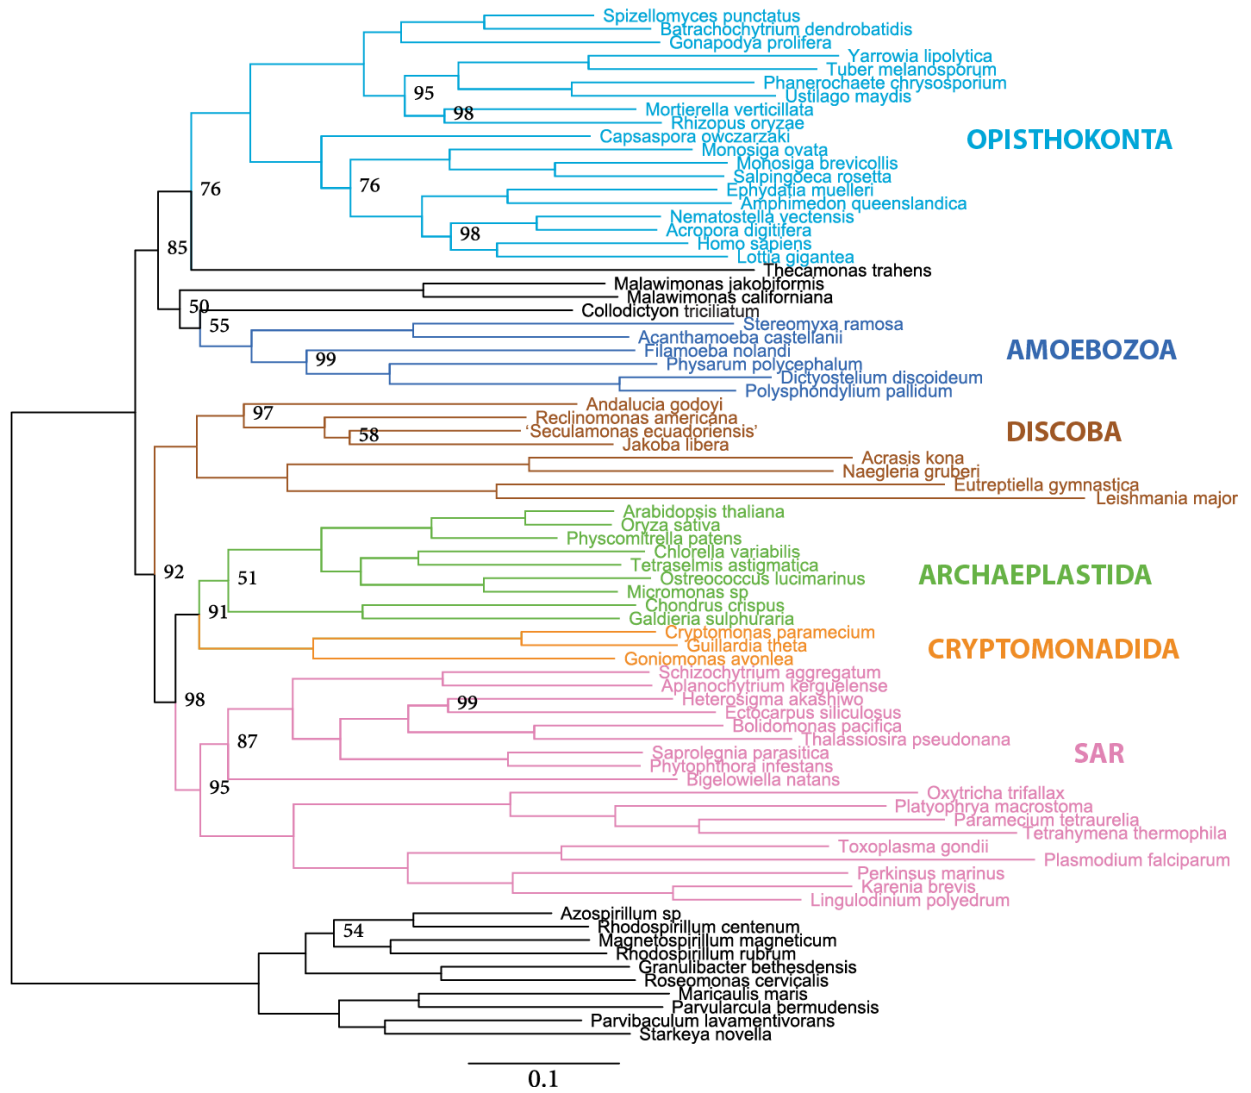

Best RAXML tree obtained from the **ALPHA-PROT** dataset under the **GTR +  $\Gamma$ 4** model. Branch support values equal to 100 are not displayed.

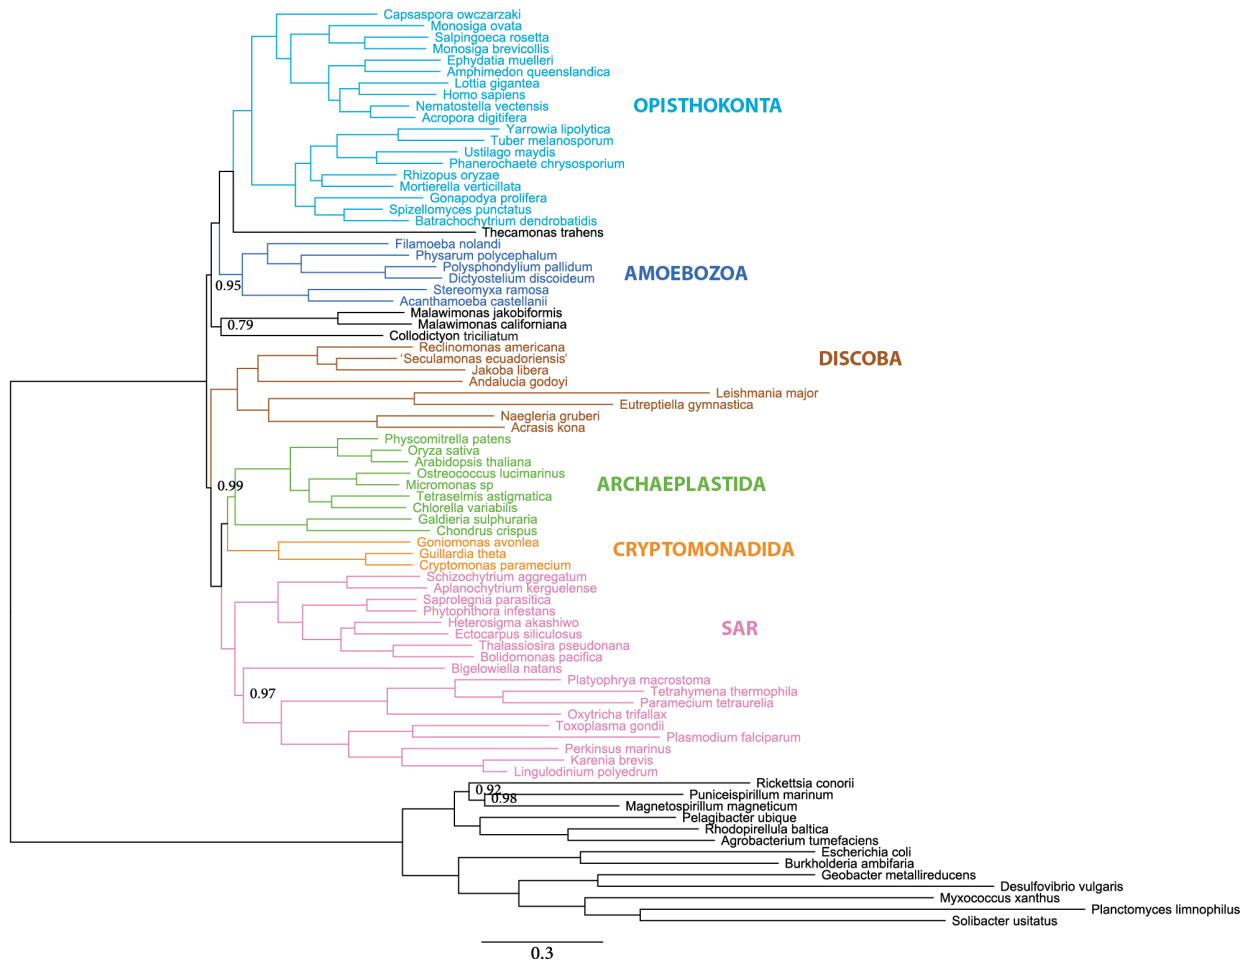

Bayesian consensus tree obtained from the **EUBAC** dataset under the **CAT-GTR +  $\Gamma_4$**  model. Branch support values equal to 1 are not displayed.

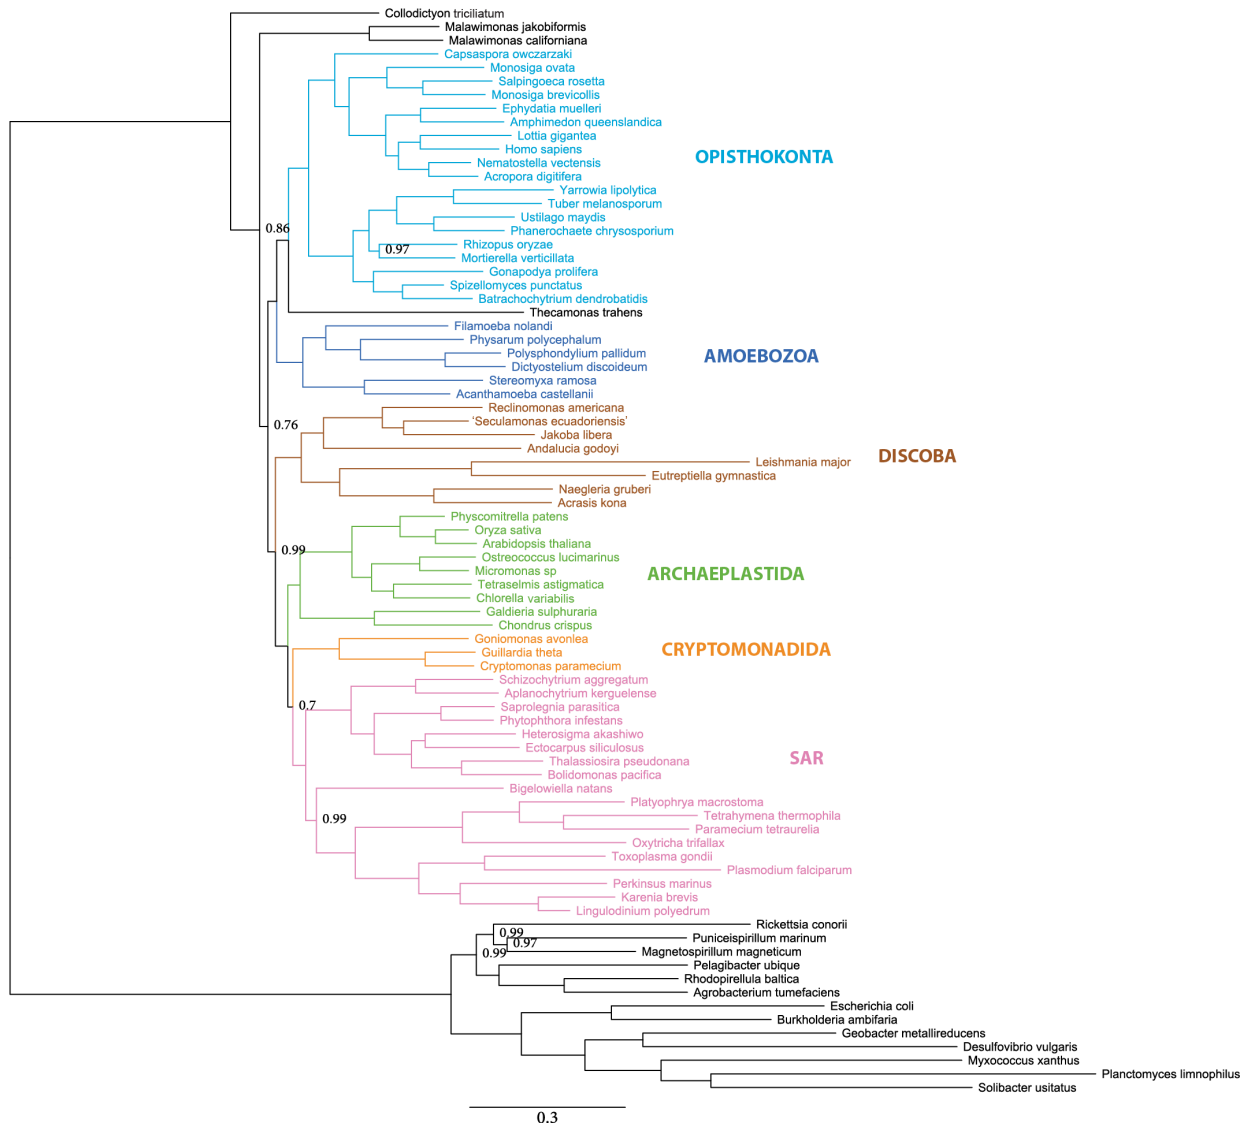

Bayesian consensus tree obtained from the **EUBAC** dataset under the **CAT +  $\Gamma$ 4** model. Branch support values equal to 1 are not displayed.



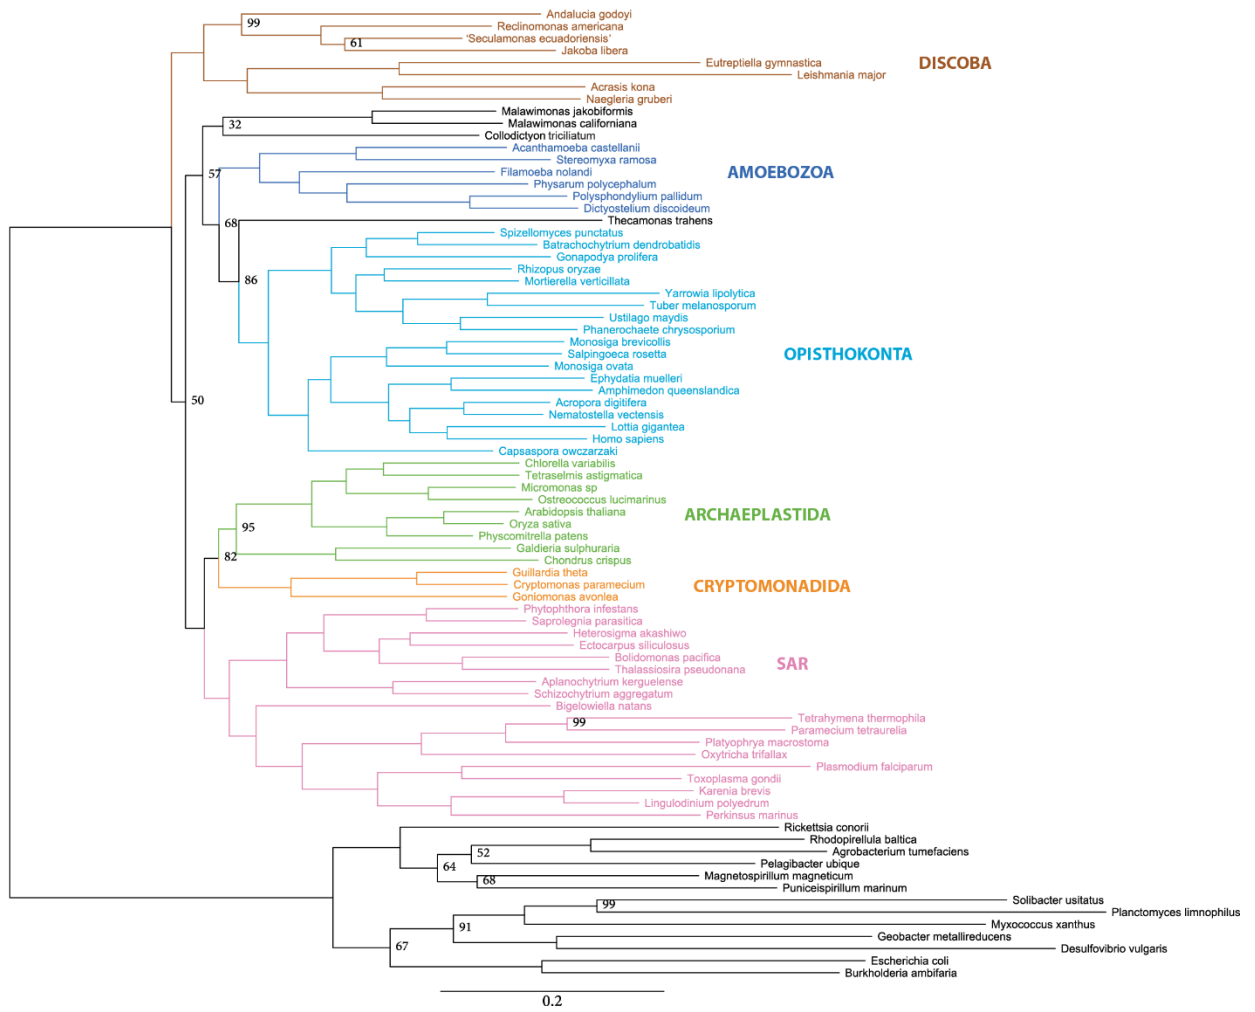

Best RAXML tree obtained from the **EUBAC** dataset under the **GTR +  $\Gamma$ 4** model. Branch support values equal to 100 are not displayed.

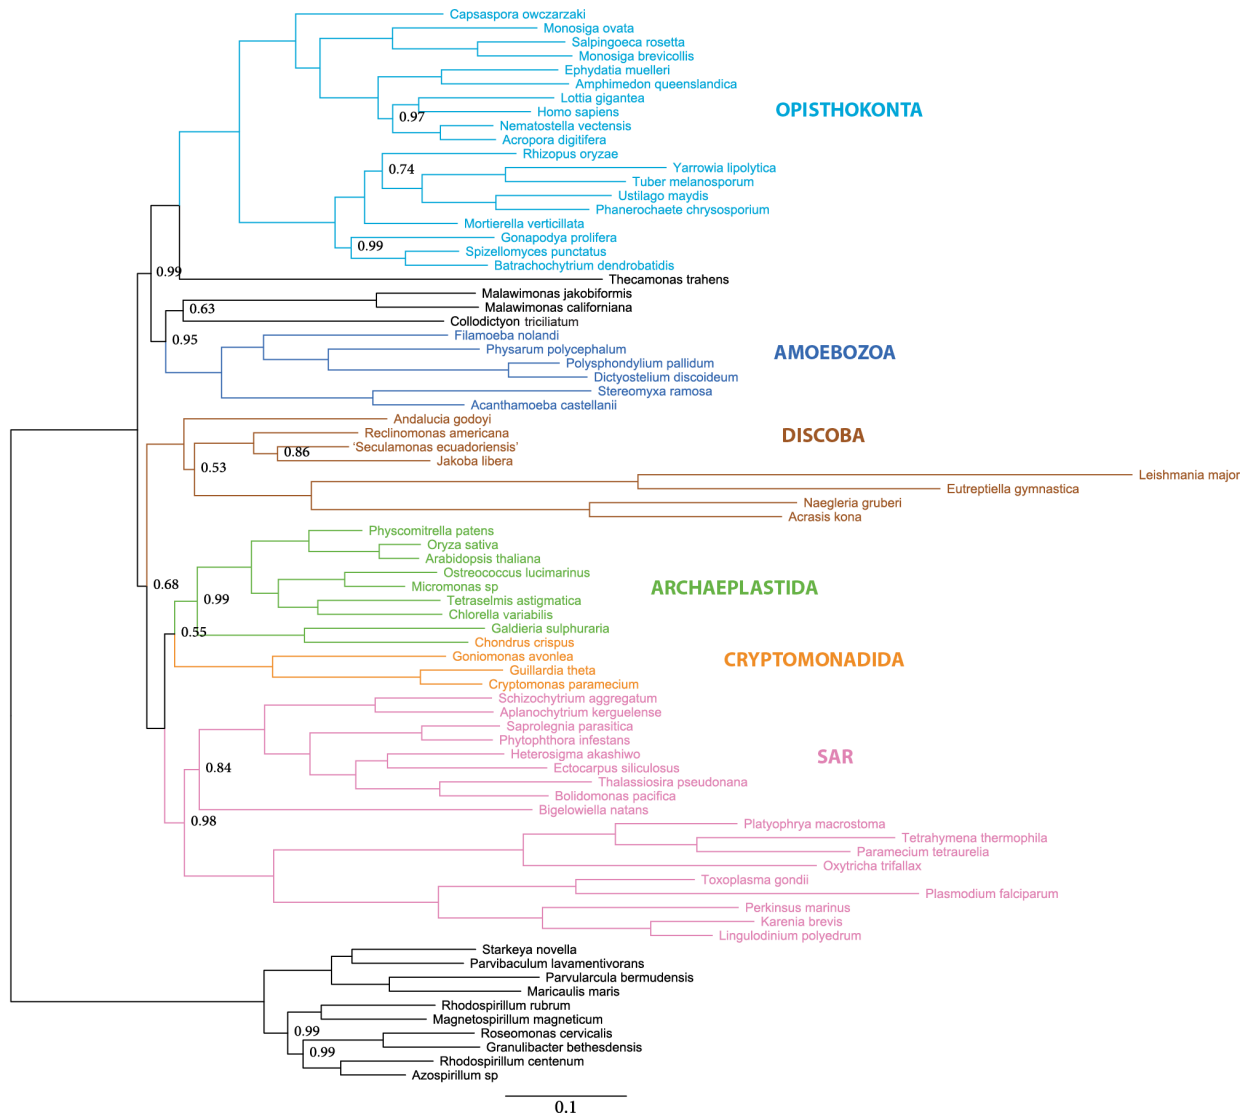

Bayesian consensus tree obtained from the **ALPHA-PROT** dataset recoded by the **dayhoff6 recoding scheme** under the **CAT-GTR +  $\Gamma$ 4** model. Branch support values equal to 1 are not displayed.

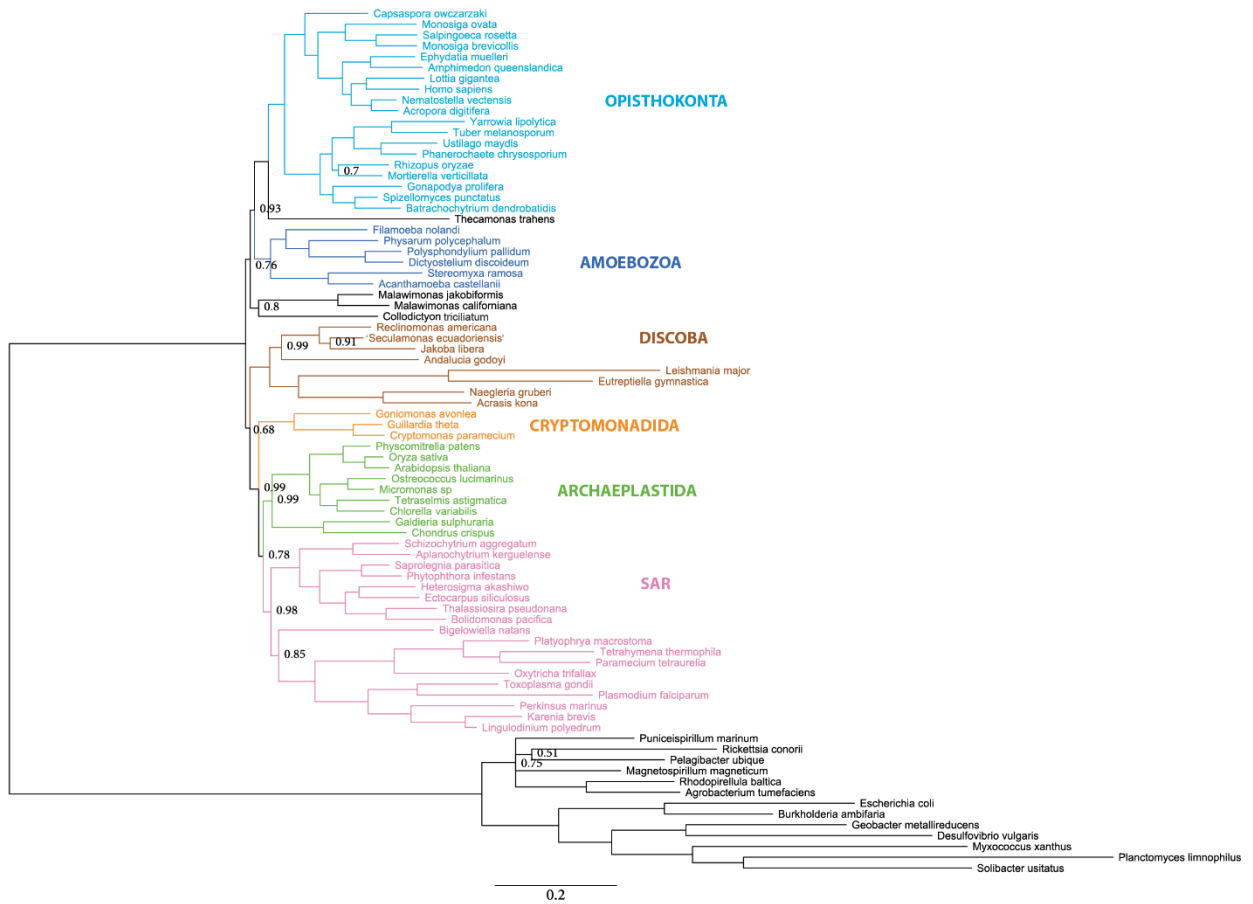

Bayesian consensus tree obtained from the **EUBAC** dataset recoded by the **dayhoff6 recoding scheme** under the **CAT-GTR +  $\Gamma$ 4** model. Branch support values equal to 1 are not displayed.

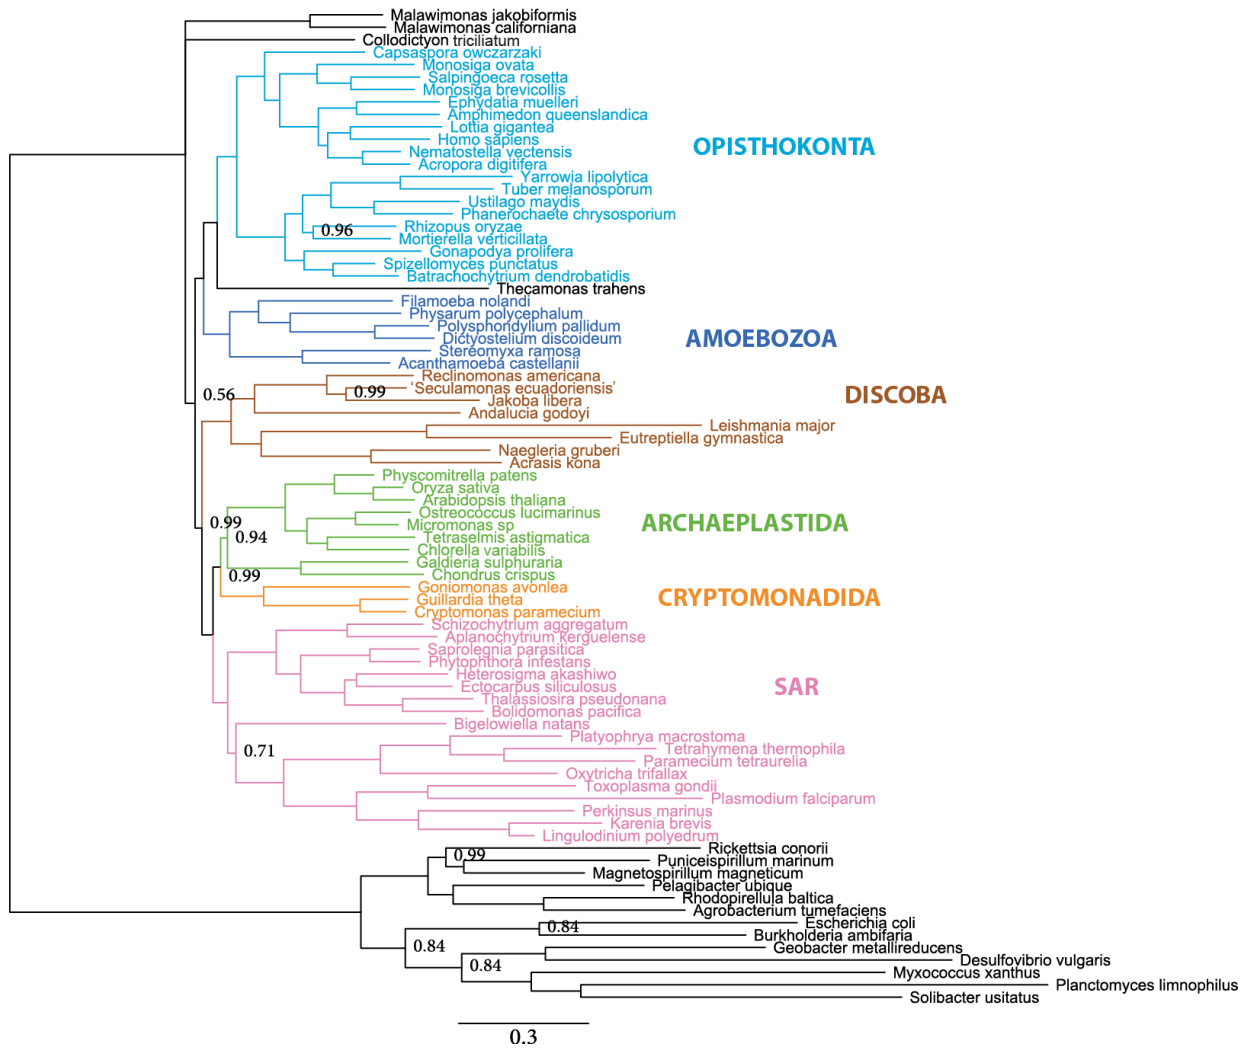

Bayesian consensus tree obtained from the **EUBAC reduced** dataset (i.e. minus the 10 most divergent markers) under the **CAT-GTR +  $\Gamma_4$**  model. Branch support values equal to 1 are not displayed.

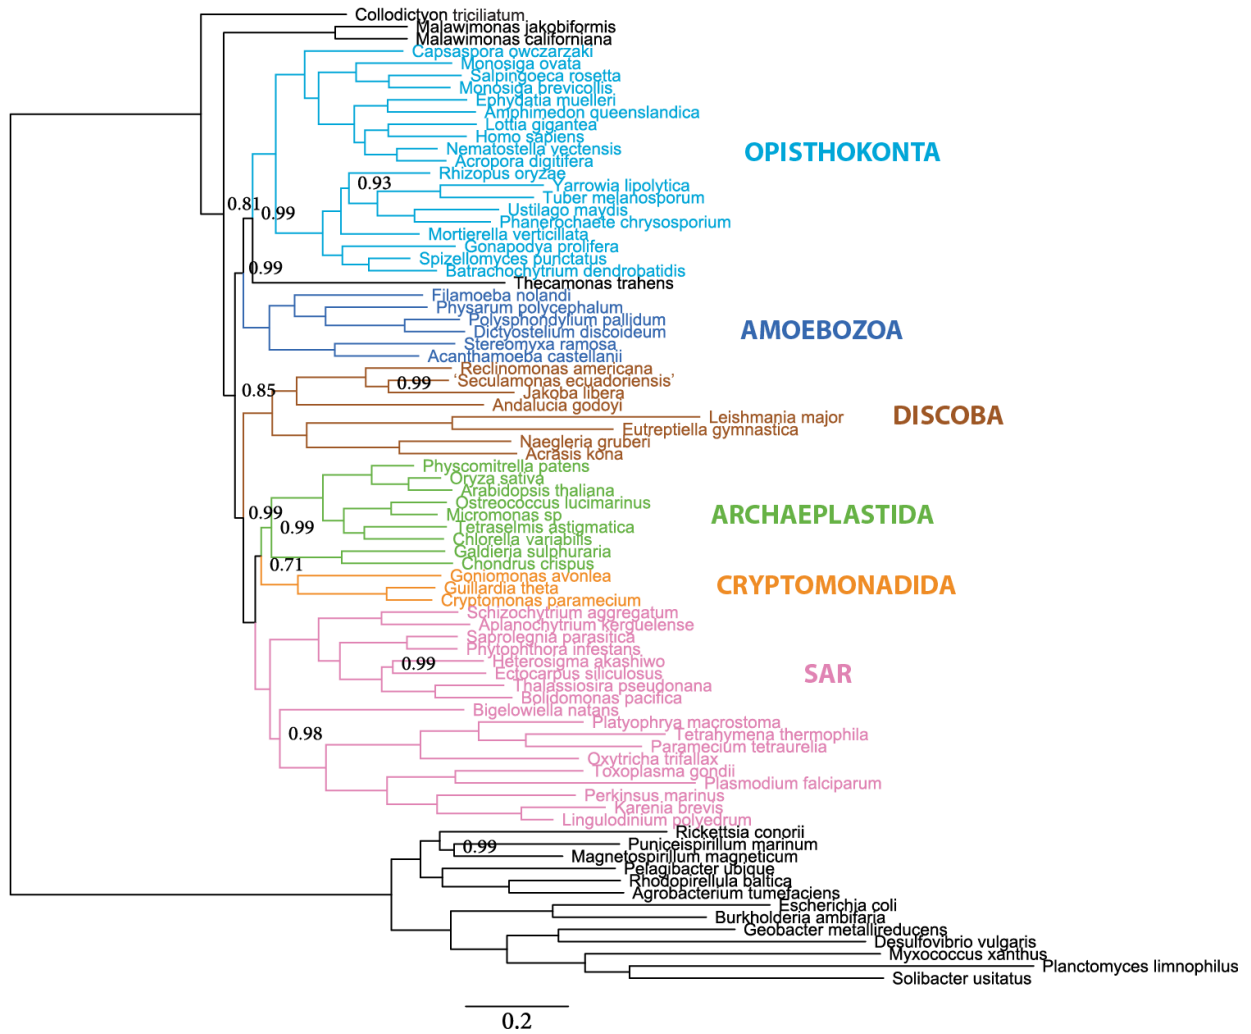

Bayesian consensus tree obtained from the **EUBAC reduced** dataset (i.e. minus the 10 most divergent markers) under the **CAT +  $\Gamma$ 4** model. Branch support values equal to 1 are not displayed.



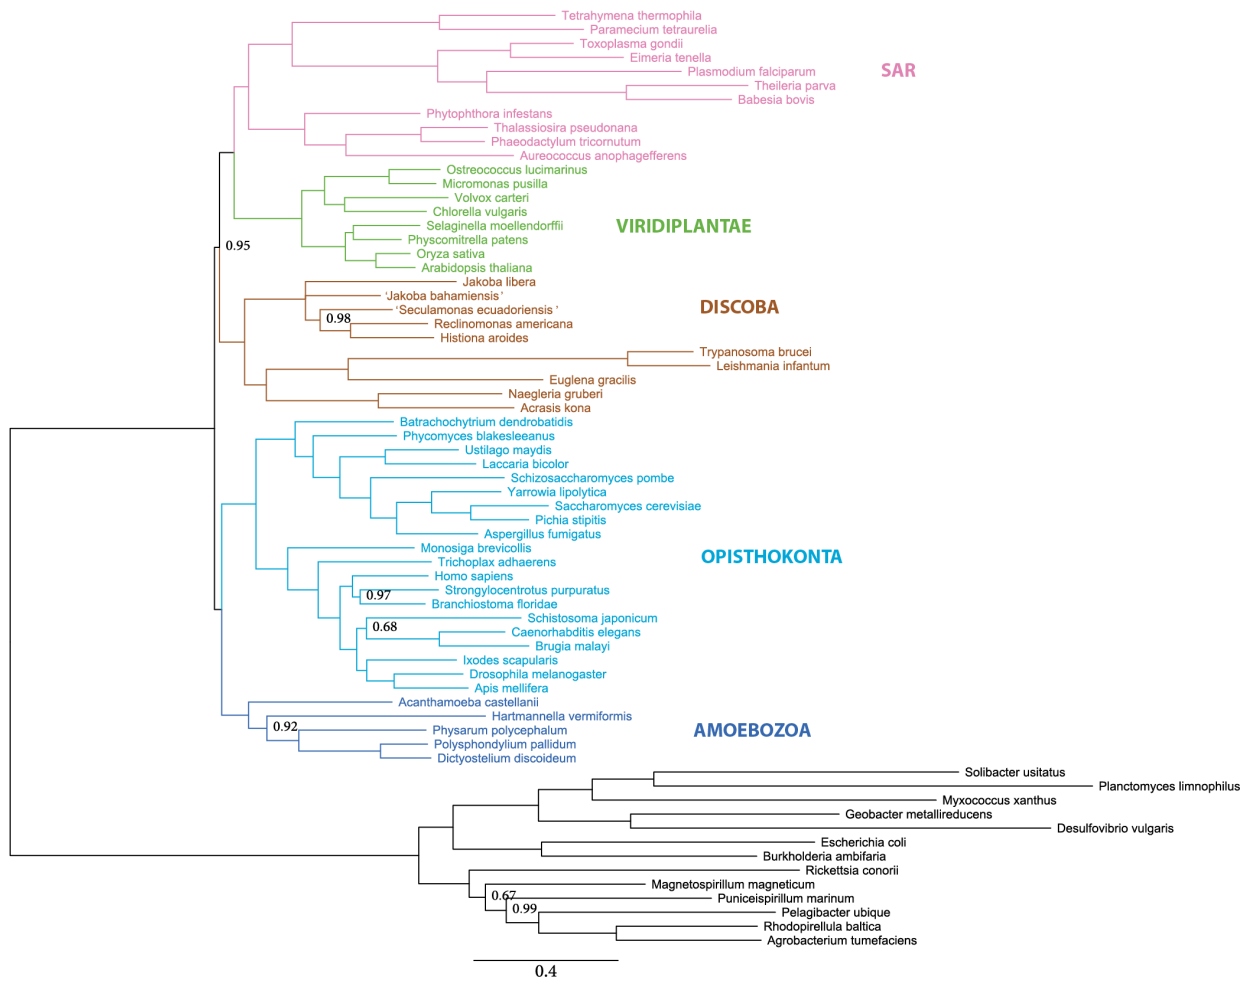

Bayesian consensus tree obtained from the **EUBAC He *et al.* 2014** dataset with distant paralogs replaced by “X” under the **CAT-GTR +  $\Gamma$ 4** model. Branch support values equal to 1 are not displayed.

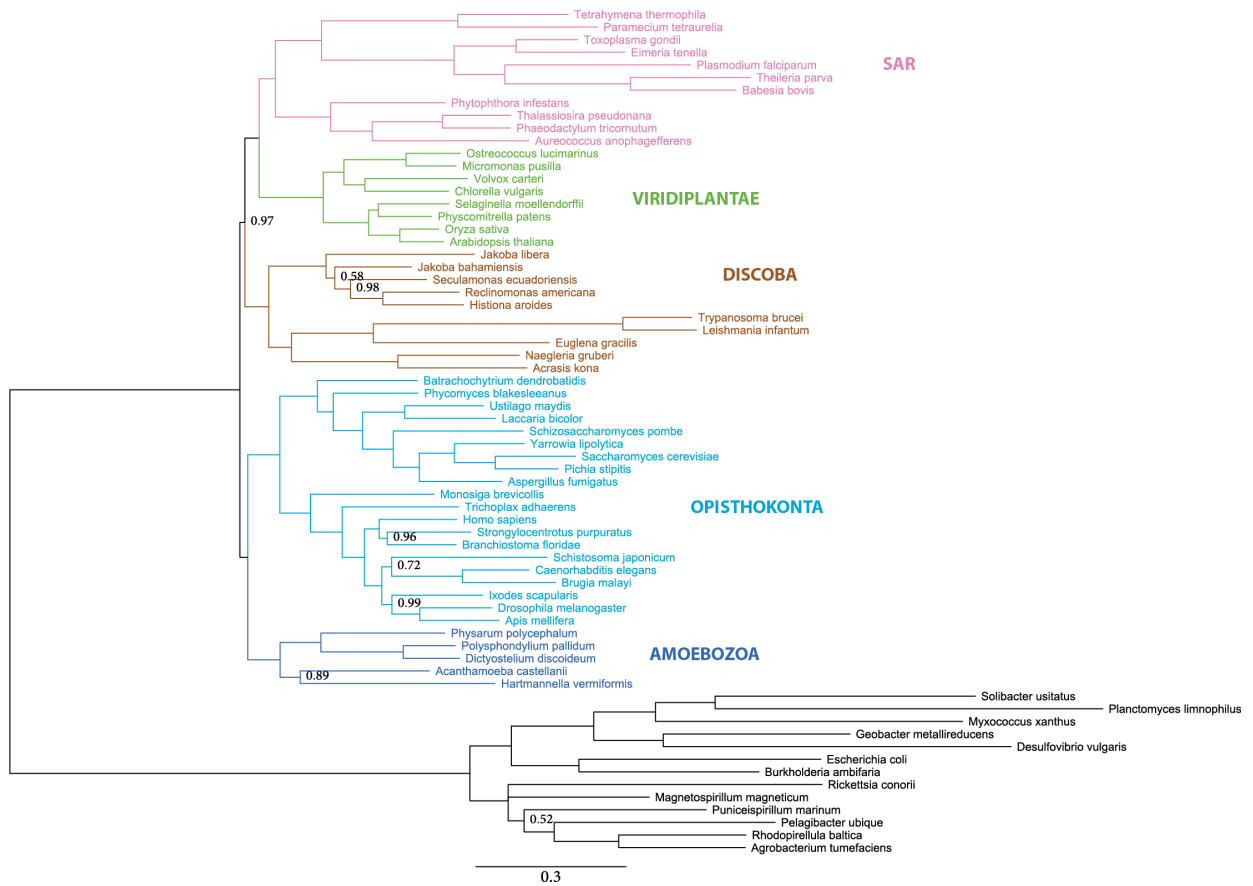

Bayesian consensus tree obtained from the **EUBAC He *et al.* 2014** dataset with distant paralogs replaced by “X” under the **CAT +  $\Gamma$ 4** model. Branch support values equal to 1 are not displayed.



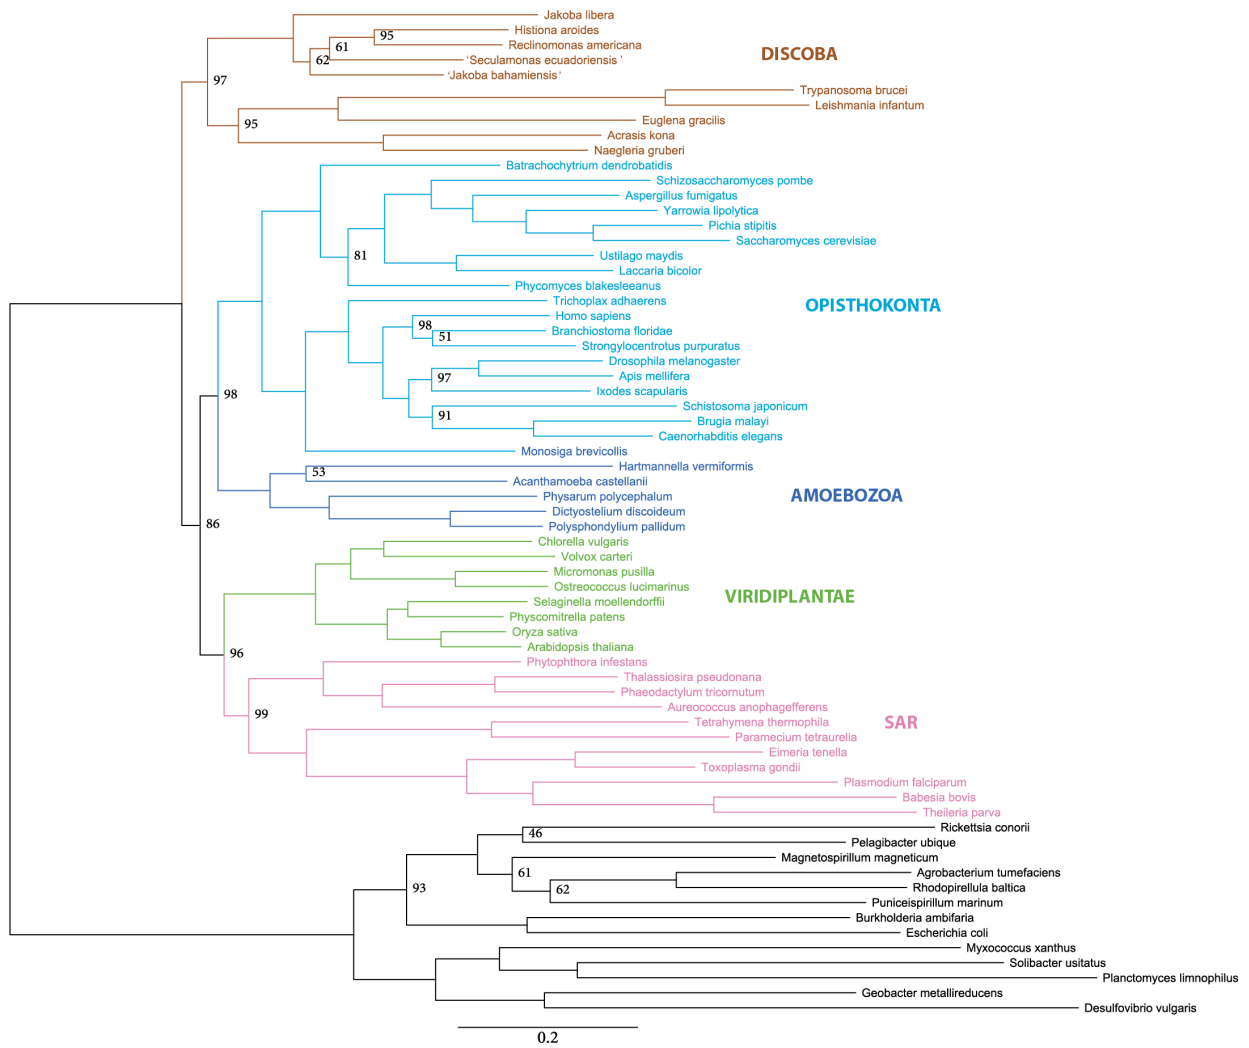

Best RAXML tree obtained from the **EUBAC He et al. 2014** dataset with distant paralogs replaced by "X" under the **GTR +  $\Gamma$ 4** model. Branch support values equal to 100 are not displayed.

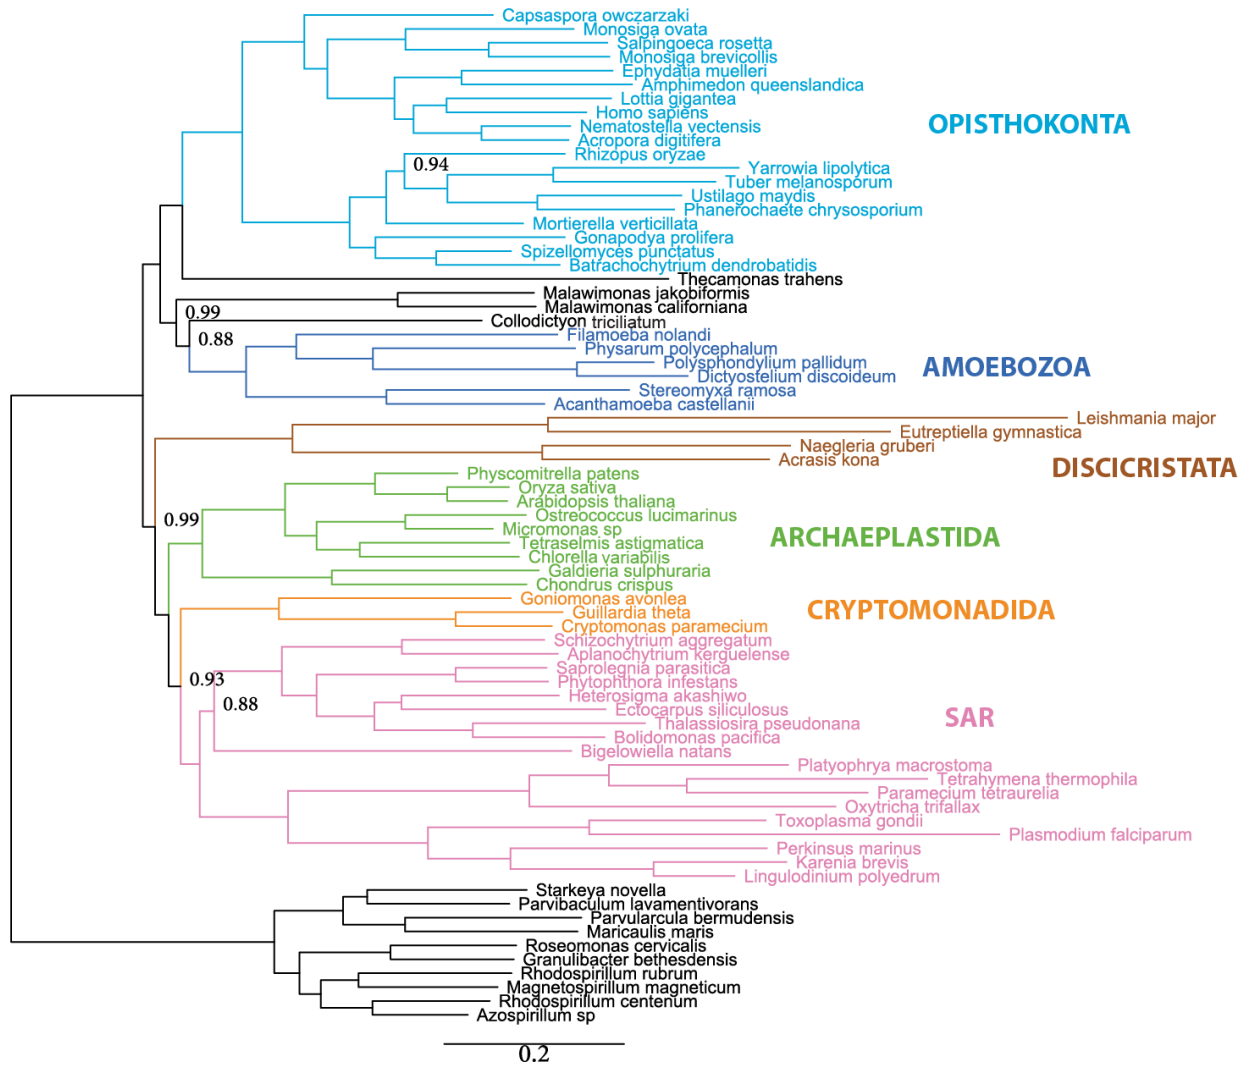

Bayesian consensus tree obtained from the **ALPHA-PROT** dataset **without Jakobida** under the **CAT +  $\Gamma$ 4** model. Branch support values equal to 1 are not displayed.

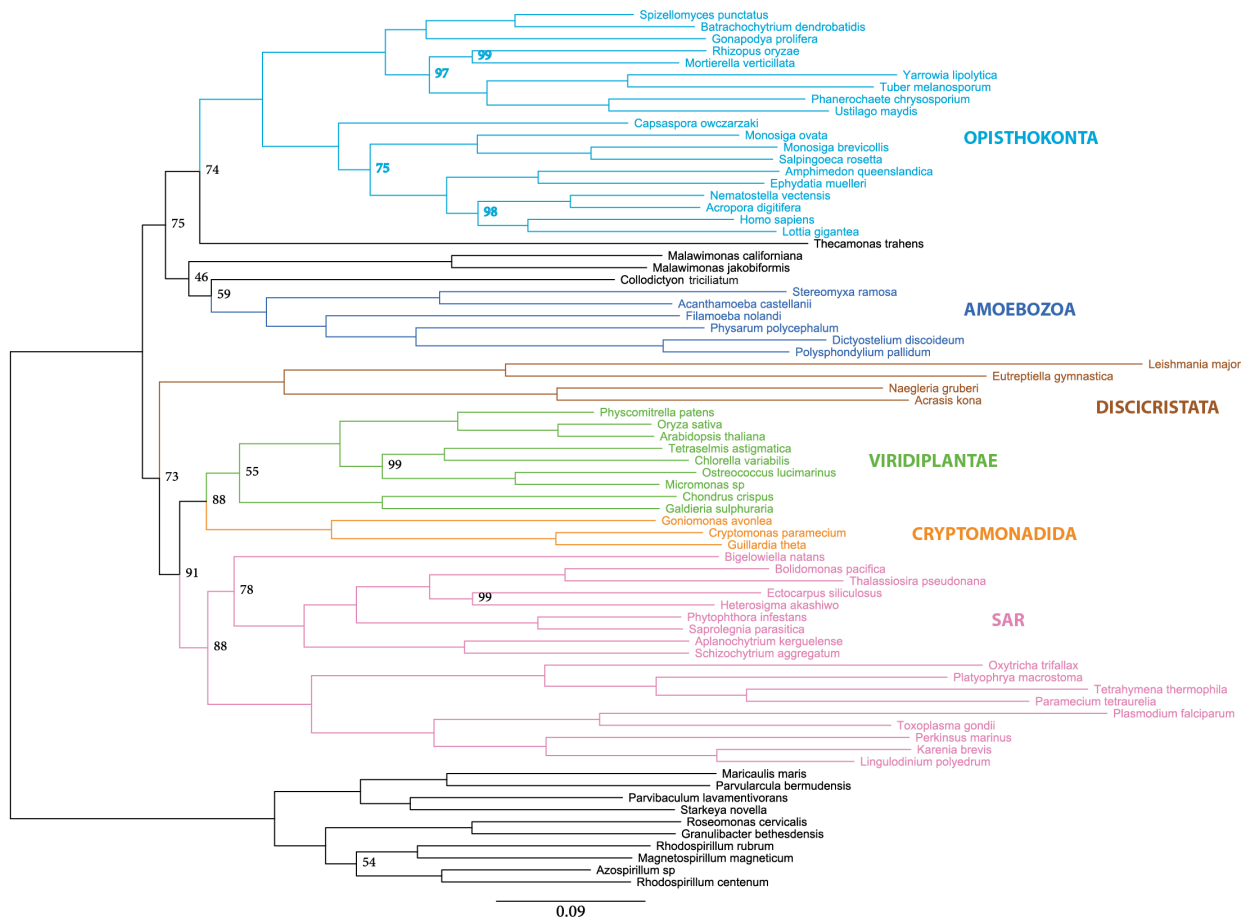

Best RAXML tree obtained from the **ALPHA-PROT** dataset **without Jakobida** under the **GTR +  $\Gamma$ 4** model. Branch support values equal to 100 are not displayed.

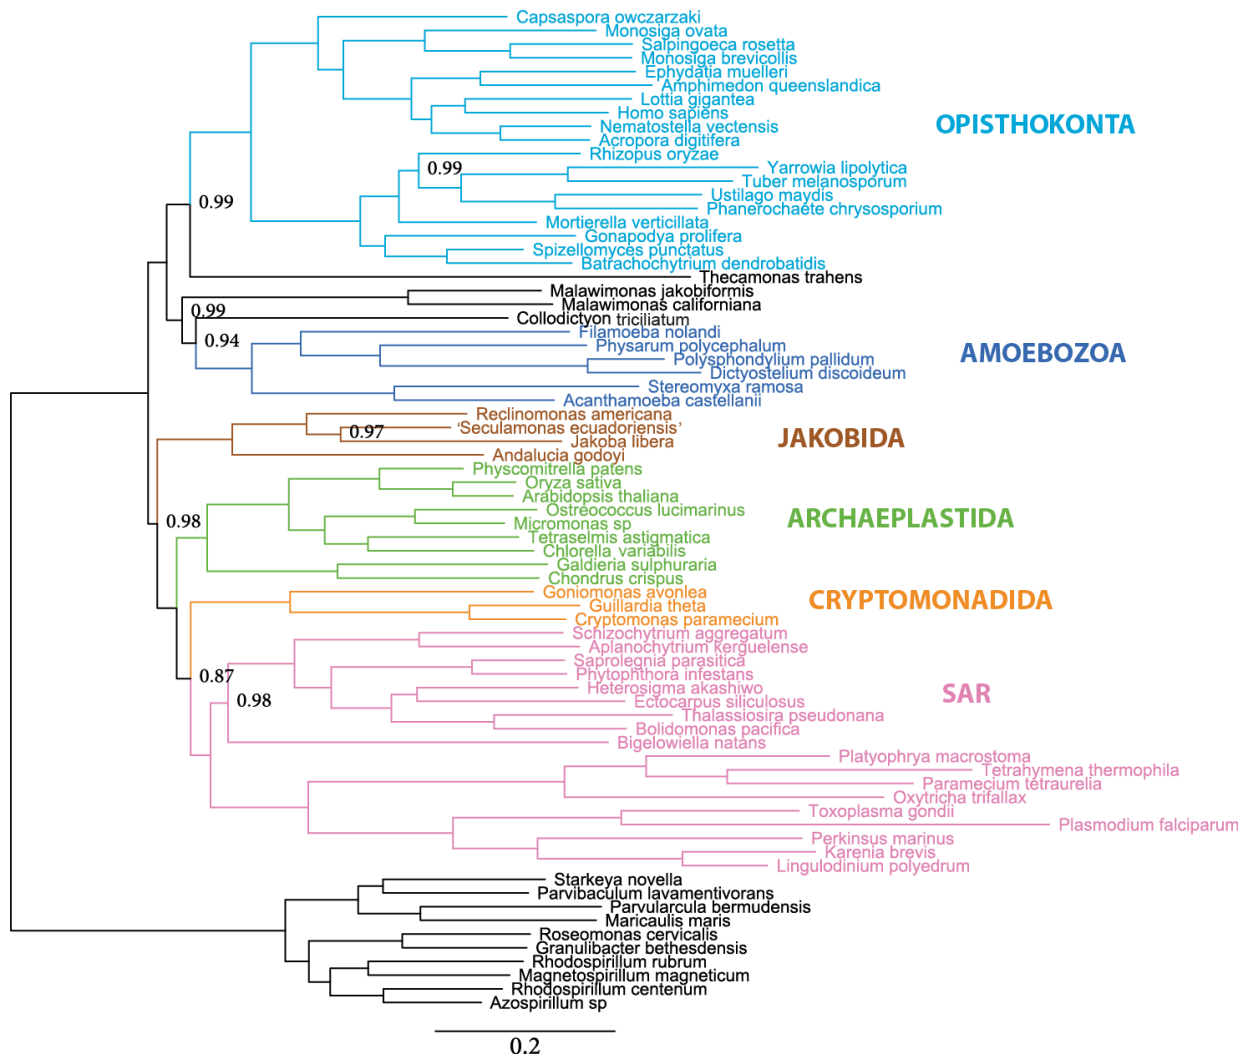

Bayesian consensus tree obtained from the **ALPHA-PROT** dataset **without Discicristata** under the **CAT +  $\Gamma$ 4** model. Branch support values equal to 1 are not displayed.

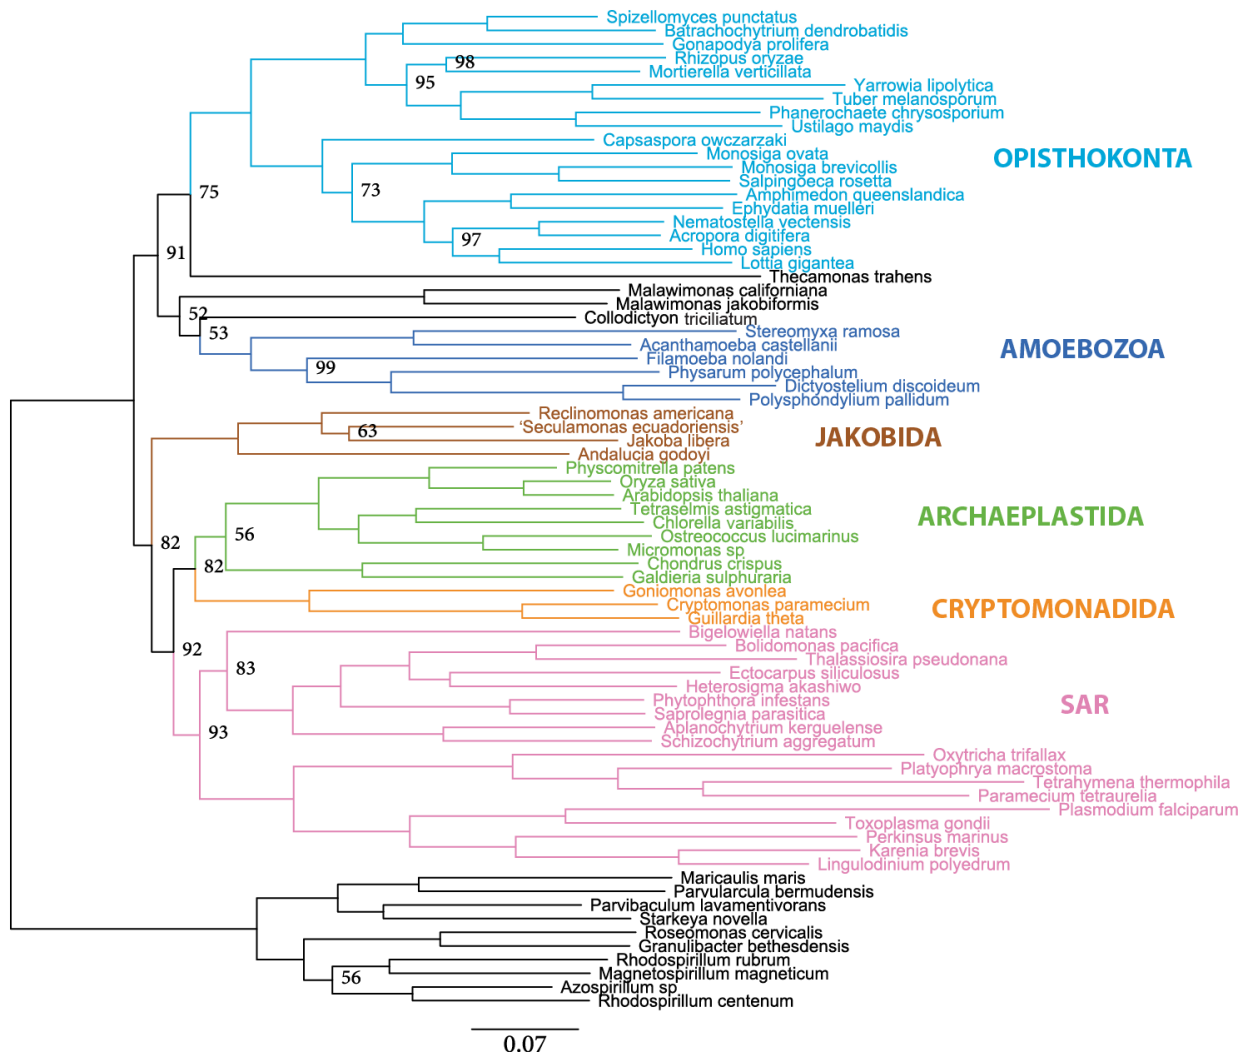

Best RAXML tree obtained from the **ALPHA-PROT** dataset **without Discicristata** under the **GTR +  $\Gamma$ 4** model. Branch support values equal to 100 are not displayed.

**Supplementary data S4:  
single-gene congruence tests**

Congruence tests using Conclustador applied on the datasets built in Derelle and Lang 2012 and He *et al.* 2014 reveal an absence of incongruence of phylogenetic signal.

In contrast, Conclustador clusters the ALPHA-PROT and EUBAC datasets in two clusters of genes. However, two independent observations demonstrate that this incongruence of phylogenetic signal is quantitative (i.e. different amounts of phylogenetic signal) rather than qualitative (i.e. conflicting phylogenetic signals), a common artefact affecting algorithms aiming to compare the phylogenetic signal between genes (Leigh *et al* 2011; Leigh *et al* 2011):

\_ we estimated the distribution of alignment sizes, approximated by the number of characters contained in the alignments (i.e. the product of the number of positions by the number of species), among clusters. This analysis reveals that, concerning both the ALPHA-PROT and the EUBAC datasets, the cluster0 is composed of large single-gene matrices while the cluster1 is composed of small single-gene matrices. The alignment sizes are significantly different between the two clusters as indicated by the two-tailed Mann-Whitney U-Test. In other words, Conclustador has clustered the genes into two groups according the size of their matrix.

\_ we then have independently performed ML GTR and CAT analyses (same parameters as those described in Material and Methods) of cluster0 and cluster1 of the ALPHA-PROT dataset to test the presence of conflicting phylogenetic signals between the two cluster of genes. As expected, the large cluster0, representing two thirds of the ALPHA-PROT dataset, gives a very similar topology as the one shown in Figure 1 (the only exception are the deep Opimoda relationships, which are unsupported here) while the small cluster1, representing only one third of the ALPHA-PROT dataset, recovers all consensual eukaryotic supergroups but fails to infer their deep relationships.

Importantly enough, (i) we can not observe any supported difference between the cluster0 and cluster1 topologies, indicating that there is no conflicting phylogenetic signal between the two clusters, and (ii) the Discoba group is found monophyletic in all four phylogenetic trees, indicating that Conclustador did not detect any conflicting phylogenetic signal between these species.

Leigh JW, Schliep K, Lopez P, Baptiste E. 2011. Let them fall where they may: congruence analysis in massive phylogenetically messy data sets. *Mol Biol Evol.* 2011 Oct;28(10):2773-85.

Leigh JW, Lapointe FJ, Lopez P, Baptiste E. 2011. Evaluating phylogenetic congruence in the post-genomic era. *Genome Biol Evol.* 2011;3:571-87.

### Summary of congruence tests performed using Conclustador

For each dataset, the table indicates how many clusters were detected by Conclustador. When more than 1 cluster were identified (i.e. cases of incongruence), the value of the CH index is indicated within brackets.

| dataset               | Conclustador analyses |                |
|-----------------------|-----------------------|----------------|
|                       | Number of clusters    | CH index value |
| Derelle and Lang 2012 | 1                     | /              |
| He <i>et al.</i> 2014 | 1                     | /              |
| ALPHAPROT             | 2                     | 7.6428         |
| EUBAC                 | 2                     | 8.3325         |

#### ALPHAPROT

##### cluster0

atp1  
atp2  
DLST  
DLDH  
ETFDH  
Hsp78  
HslVU  
mHsp60  
mHsp70  
nad7  
nad11  
odpA  
tufA  
ndufv1  
SUCLG1  
UQCRC1  
sdh1  
TypA

#### ALPHAPROT

##### cluster1

atp3  
cytc1  
mrl3  
nad8  
ndufv2  
odpB  
PET112  
CLPP  
etfB  
mtif2  
ndufa9  
NifU  
PCCA  
sdh2  
cox11  
grpE  
nad10  
ndufaf5  
nsf1  
PCCB  
UQCRFS1

#### EUBAC

##### cluster0

prot\_1  
prot\_2  
prot\_3  
prot\_4  
prot\_5  
prot\_6  
prot\_7  
prot\_8  
prot\_10  
prot\_14  
prot\_15  
prot\_16  
prot\_18  
prot\_19  
prot\_20  
prot\_24  
prot\_27  
prot\_23  
prot\_30  
prot\_37

##### EUBAC cluster1

prot\_9  
prot\_11  
prot\_12  
prot\_13  
prot\_17  
prot\_21  
prot\_22  
prot\_25  
prot\_26  
prot\_28  
prot\_29  
prot\_31  
prot\_32  
prot\_33  
prot\_34  
prot\_35  
prot\_36



### **Distributions of alignment sizes among clusters**

The results of the two-tailed Mann-Whitney U-Tests are indicated on top of the box plot graphics.

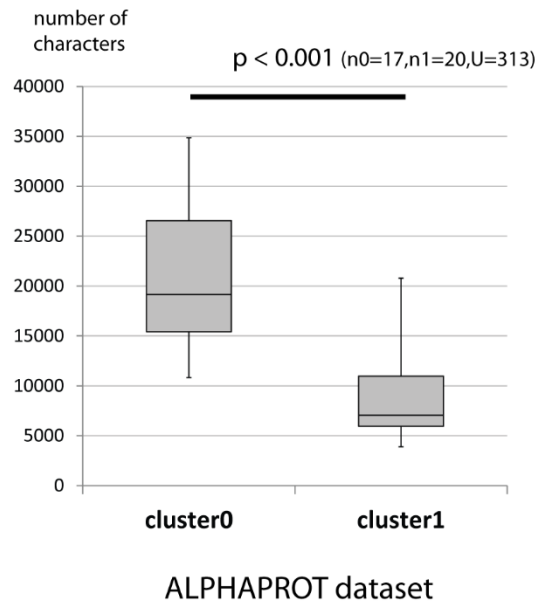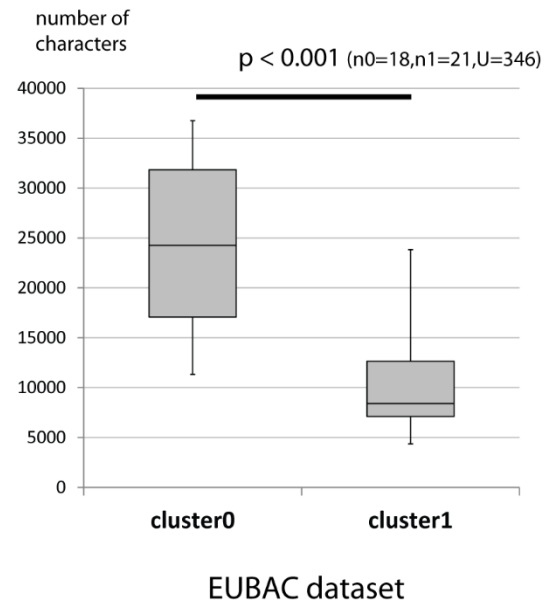

### Consensus Bayesian tree obtained under the CAT model from the ALPHA-PROT cluster0

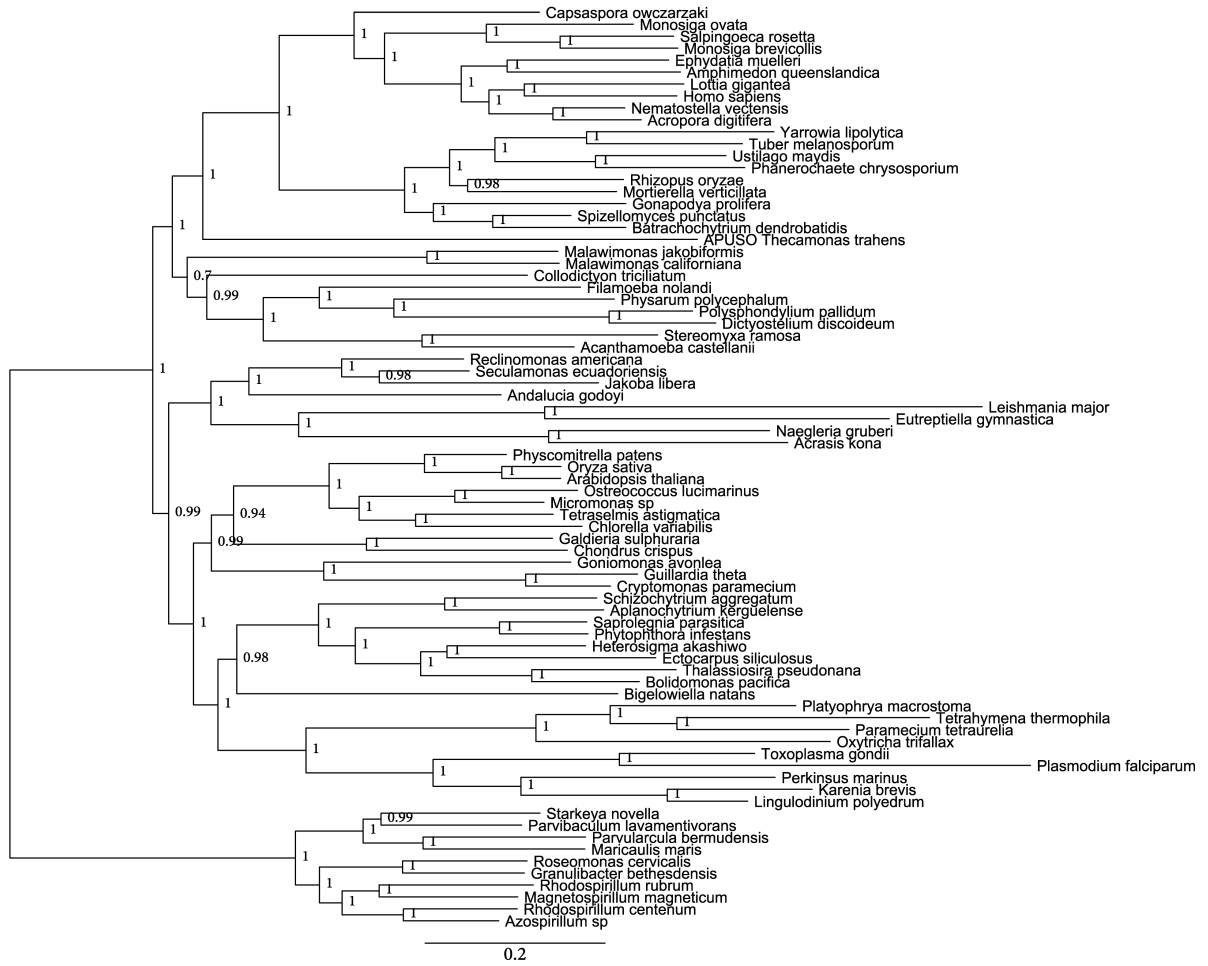

### ML tree obtained under the PROTGAMMAGTR model from the ALPHA-PROT cluster0

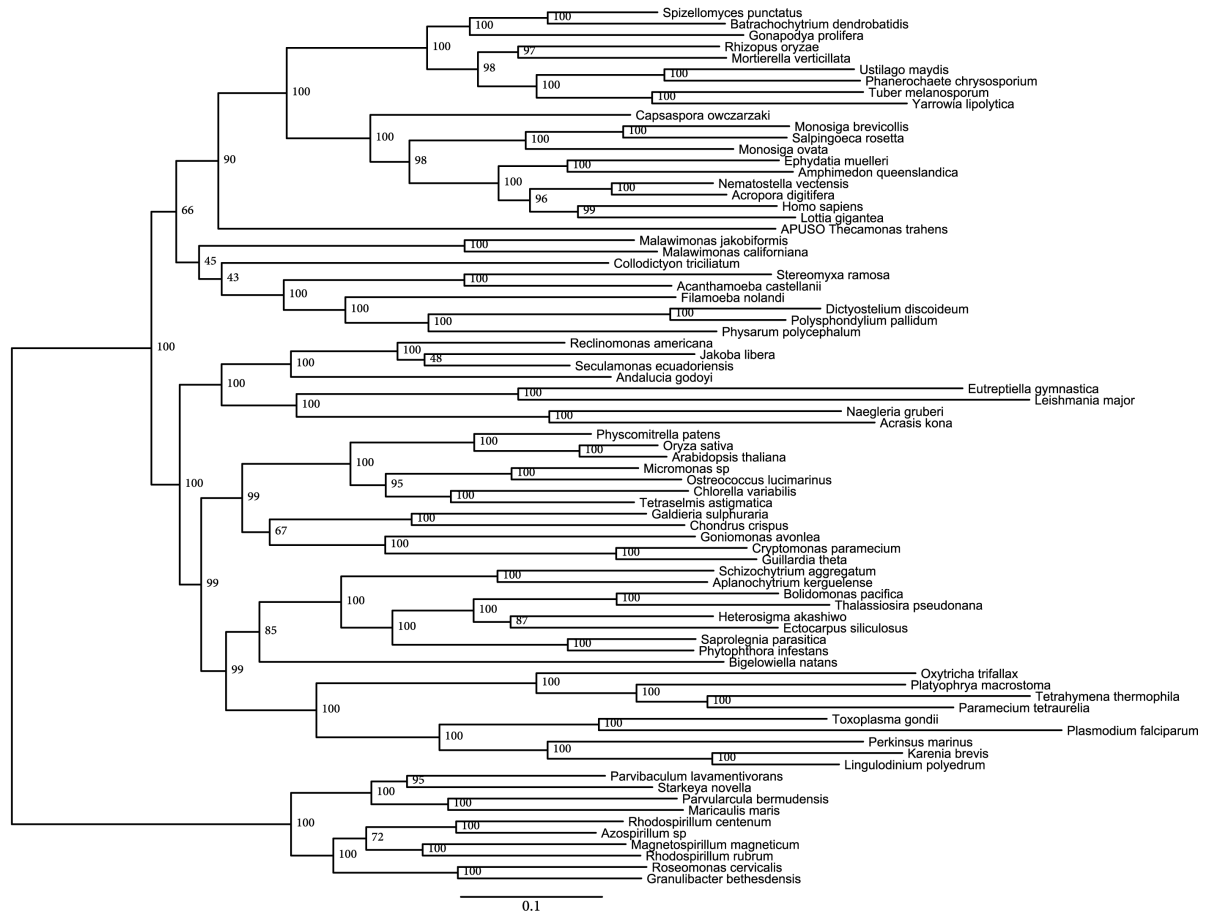

**Consensus Bayesian tree obtained under the CAT model from the ALPHA-PROT cluster1**

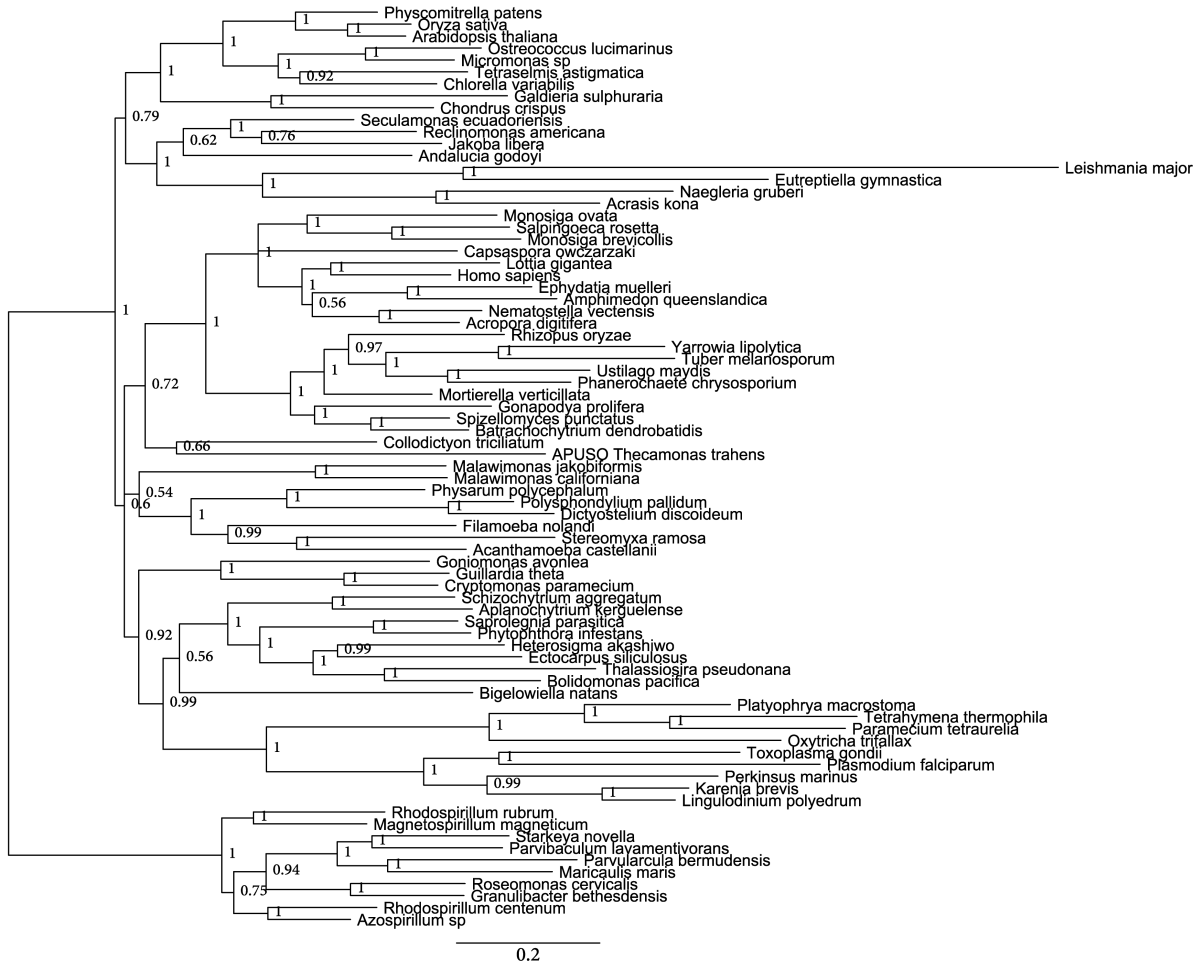

### ML tree obtained under the PROTGAMMAGTR model from the ALPHA-PROT cluster1

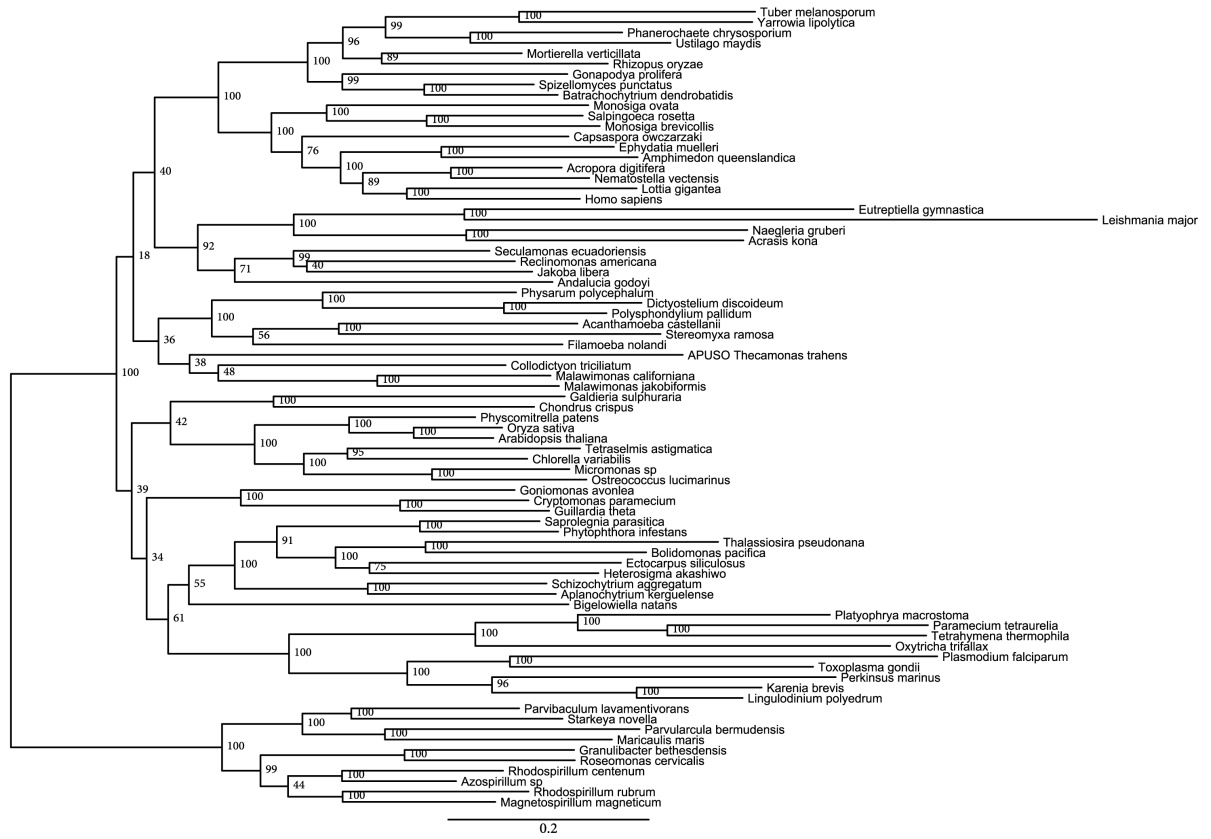

**Supplementary data S5:  
new sequences used in this study**

>Andalucia\_godoyi@atp1

MNLSAAELSHLEERITNSYKELNIDEKGRVLSVGDGIARVYGLNNIQAGEMVEFSSGIRGMALNLENDNVGIVIFGNDR  
VIKEDGVVVRTGTIVDVPVGKELLGRVIDALGNPIDGKGPINGNRRRIEVKAPGIIARKSVSEPMQTGLKAVDSLVPIGR  
GQRELIIGDRQTGKTAVAIDAMINQKSVNQAAAGSDDKKKLCFIYVAIGQKRSTVAQIVRTLEEAGALEYSVIVAATASE  
AAPLQFLAPYTGCTIGEFRRDNGMHALITYDDLSKQAVAYRQMSLLRRPPGREAFPGDVVYLSRLLERAAKMSDAE  
GAGSLTALPVIEQAGDVSAYIPTNVISITDGGQIFLETFLYRGRVPAINVGLSVSRVGSAAQVKAMKQVAGTLKLDLQ  
YREVAFAAQFGSDDLASTQQLSRGARMTELLKQGQFTPMVVEEQVIVLYAGTRGYLDKIKVNEIHAFEESSLKLFKT  
QHSDDLAKIRQEKQISKELDQNLAKIFGDFATANFVASKA

>Andalucia\_godoyi@atp2

MAGRRTFAAAVHGRVTVQVIGAVVDVQFDEQLPILNALEVPLADNQRVLVLEVAQHLGENTVRTIAMESTDGLTRGLA  
VKDTGAPIMVPPVGRECLGRIMNVIGEPIDGRGPSTKMRAPHAEPFAFSEQSTSQEILITGIKVVDLLAPYARGGKIGLFG  
GAGVGTVMIMELINNIKKHGGFSVFGGGERTRGNDLYREMIESGVIKLDNDQSKAALVYGMNEPPGARARV  
LTALTVAEYFRDQENQDVLVFDNIFRFTQANSEVSALLGRIPSAVGYQPTLATDLGGLQERITTTKKSITSVQAIYVP  
ADDLTDAPATTFSHLDATTVLSRQIAELGIYPVDPLDSTSRMMDPRIIQQEHYDVARGVQKILQDYKSLQDIIAILGM  
DELSEEDRLVSRARKIQRFLSQPFVHAEVFTGRHGKVELKDTISGFKGVMKGDYDDIPEPAFYMCGNIAEVLANAQK  
MANA

>Andalucia\_godoyi@atp3

MVAASKLRQAQRSCGVRPFQSSLLQQLPGSVSNFTGSKHLIIAITDRGLCGGVNSVVKTKKVLKELVANGSEVSIV  
CVGEKGRDALVRECGKSMVKIINDVTRKPVNFLAASALSEEILSYPFDRCTIVYNEFKSVIAQVVTGNIPSYDAYVADP  
AGWGEYFSDQASLLYNFEEFSMATRILSALLENATSEQGARMSAMDSAARNAGDMINKLSLSYNKARQAAITSELI  
DIISAAGAVSK

>Andalucia\_godoyi@cox11

MRIEKKTIFLYLIAMILFMFALSASVPLYRVFCQVTGYGGTAQILDYVPLVDEELPKRILTIRFNADVGVEMPWKFAP  
QKEMKVLVGESALAFYEATNPETHDLIGISTYNVTPQQAGIYFNKIQCFDEQMLKSQESIDMPVFFIDPFDLEPRM  
NEIDTITLSYTFVADHA

>Andalucia\_godoyi@eyt1

MLAGRLLSRALPFAAVVPMMSATLVASDDAVPAPSYPWDHLSPFSSFDHSSIRRLQVYREICASCHSLSRVAYRNLV  
VAMTEEEAKAFASSVEVQDGPNDAGEMFMRPGKLSDFVAPYPNEQAARAMNGGSYPDLSLIVKARPHEDYLFAL  
LTGYGHASPAQVSLREGLHYNPYFAGGAIGMPQLYDGSIEYEDGTPNPLQLSRDVATFLAWASEPEHDERKLMGIK  
YMGIMTVVAATAFFYKRHKWALLKSRRIEFRQPGK

>Andalucia\_godoyi@DLDH

MFSISTVARRFSTSASHDLVVIGGGPGGYVAAIRAAQLGLKVACVEKRGSLGGTCLNVGCIPIKALLHASHLYHEAQHD  
FSKYGVKVSGLVELDLSTMMKQKGTAVTGLTRGIEMLFKKNKVDYKSGRIESATSVAVAPTVENGSASNASEVVLN  
TKNILIATGSIPTLPLKFKDEKTVVSSGTALSLDKVPKLLAVVGGVIGLELGSVWARLGAETVIEAAARCAPFLDEEI  
GDQFVKIMKKQGLNIATNTKVLGADRTAAGIKLKLDSKDLGDSLEADVVLVSVGRKPFRTGGLGLEKAGVELDRQGRV  
VVDHFRKTVPSIWAIGDVIAGPMLAHKAEEDGIAAENMAGKAGHVNYDTPVNIYTFPEVAWVGKSEQQLKAEGV  
KYRVGKFPFVANSRARTNDQPDGLVKVVDAETDKLLGMHIIGSLAGEQIAEGLALEYGAASEDIARTCHAHTLSE  
AIKEACM

>Andalucia\_godoyi@DLST

MSMAMSPMSVSSPSLFAAPRCARRFFSSSPAIEDIVVPKMGDSITEGTVMGWLKNPGDAVKVDDVLVQLETDKITVE  
VRSHVGGALQSQLANKGDAVKVGAIIAKVKVGAAGSTLTPAAPAAAAAATAAATAAATKASESAAEKKSEAKKT  
AVTEKKASAGQVIMVAGALETRTPMSRMRKRIERLKAQNTYALLTTFNEDMSALIERKVVYGESFEKKGHTKL  
GFMSPFVKASANALKNQPLINAVIDGTDIVYRSYVDVSVAVATPTGLVVPVLRNCQDMGFADVEKELGKLEKARTGQ  
LSMDDMQGGFTISNGGVFGLSFGTPIVPPQSAILGMHATKPRPVAVDGKVEVRPMMYLALTYDHRLIDGREAVTFL  
KSIKEQIEDPRRIIDL

>Andalucia\_godoyi@etfB

MKLLVGVKRVIDYAVKIRVRPNLGVVTENVKMSMNPFDIEAVEECVRLKEKGVAKEVVAVTIGPKPSSEILRTALAM  
GADRAIHVEVADGSTVEPLAVAKVLRALVAKEQPSAVLLGKQAIIDDANQTAQILAGLLRWPQAAAFASKIAVAQDKA  
SADIVREIDGGLETVSVKLPAVMSVDLRLNEPRYVTLPLNLMKARKKALETVTPDSLGDVITPRLEILRVEEPKIRIGR  
VESVDDLVLHKLKNEAKVI

>Andalucia\_godoyi@grpE

MSVFPTRRWFNSNETSTPANNDQSKPTPSSSSSSSSSANGSANANGNGNGNGNEVMEGLKKQLEESAACLKECESKY  
LYALAEETENVTRARRDVENANKYGISKFAQSLLDVADNLQRALTAVSESDKSSSLFTGVQMTEKVLTKAFEVNGLV  
KMSAMGESFNPEVHQAMFEMPQDKPGTIAAVLRDGYVLHGRTRIPAQVGVIAKD

>Andalucia\_godoyi@prot\_10

MSNAETYKQSDITQLMSLIINTFYSNKEIFLRELISNASDALDKIRHIGLTKAALDTEPDLRIDHDPKESNTLTIRDGTGIG  
MTKADLNNLGTIARSGTKQFMEALQAGADISLIGQFVGFYSAYLVAERTVVISKHNDQDHIWESSAGGTFEVTHTDP  
EGSVSGKLTTRGSMILHMKEDQADYNDEKKVRDLVKKHSEFIGYPIYLFVKKTVEKEVEEEEEAAEKKPEGDEAKIE  
DVTDAEKKKSKKKVSETEEKFEHLNTPKIWTRDPKDVTKEEYASFYKAISNDWEEHLAVKHFSVEGQLEFKAVI  
YVPRAPFDMFDTKKNQNNIKLYVRRVFIMDDCAEIIPEWLSFVKGVDSEDLPLNISREMLQONKILKVIKRLVKKCI  
DLFFEISENAEDYKFFYESFSKLNKLGIHEDTANRTKLAELLRYHSTKSSEEMTTLKDYISRMKESQKDIYITGESKAA  
VEKSPFLEACKKRDLVLFMVEPIDEYCVQQLREFEGKLVCVTKGLVFPDETEDEKKSKEERKAQFEGGLCKSVKEVL  
GDKVEKVLGDRMVESPCILVTGEFGWSANMERIMKAKALRDSSMSTYMASRKTMLNPNHPIVDELKRKCAESVDK  
TAKDLIFLFFETALLVSGFLDNPADYANRIHRMIKLGSLDGSSSSSSSSSAAPEVSAVDSEMESVD

>Andalucia\_godoyi@prot\_11

VPEHCPGSPSETAGQTSACAGCPNQLCASGAVRQPKDDPDIPIHRMSSVKHRVLVMSGKGGVKGSTLSTQLSLWLA  
LLPASQLGAILAGQSASTPVSSAVGGNWWESYEALADSEKVVQGLCDLDICGSPSPTMLRLPPNPSVHASNAGVTPIYPT  
IPVSLDDAHDATDVYLDNLAVMSIGALLPSESTAVIWRGDRKSAMVTRFLRDVDWGDLDLFDITPPGTSDEHITVSTT  
LRDVGALDGLLVTTPQAVACADVRRQISFCKKVGIPILGIVENMSGYVCKKCKTETAIFRASEGGGEALAEFGIPFLG  
RIPLDGNVVRAGDAGVPLPDGIVARALHVSVCNLLHQIAAHQVASA

>Andalucia\_godoyi@prot\_13

MAKLTATSEEVLAATAKKWIRFVNASPTPFHAVSNVSTQLAAAGFTRLDERSEWSIQAGGKYFVSRNQSSLIAFCIGSKF  
TPSQNSGFQVIATHTDSPVLKLLKASDVRRAGYQTVSVEVYGGVLLHTWDRDLGVAGRIVRKEGEDGLSSALQKH  
LVCIDEPIARLSSLAHNLNREVNSDGFKFNAETHLHPVLHTLAEDLNRPISPLEGITQNHPPALMALLAAKIGCDAKEIV  
DFDLSLFDTQAAALGGLLKEVFTARIDNLLSTFCAVEALTGSLSVADSDGVRLVAMFDHEECGSQSSHGADSQMLP

TMERIVESLVGAAPAAPATPAAQAGVKSGLQSVRQQAFAKSLVLSVDCAHAVHPNYAEKHHELLRPMINKGVVIKVN  
 NNQRYATNDLGVAAVVECAQRATQGSVALQLVQVKNDSPCGTTVGPILSSRLGVRTVDIGCPQLSMHSIREMCGTVDI  
 VHMERLMOQSFIDHYPTVDKLLSSE

>Andalucia\_godoyi@prot\_14

LMDSAESFLSGSSSVLENMYEQWQKDPSSVHPSWKRYFESFHATPLVRPAPKGVHVSSTSTSQISEAALRDSIKMM  
 QLIRAYRICGHLAADLDPLGLTLPQRHPELDPHSYGFSSTADDDHKIFIGTELGSSSLEQYAYQNFQDGLVRKLLKTTYTGR  
 IGVEYFHITDVQOREWISHQMEHGKPHDISKEEKRNISYLAQAEGFENFLAQKFNTAKRFGLEGGESTIPCLEVSLETA  
 AQLGVEAAVIGMAHRGRNLVGNVMKPPAQIFHEFKGEGNKGESTFFGSGDVKYHLGTSADRLIGGNSFHVSMATAN  
 PSHLEFVNPVVEGKTRAKQHFSGDTNRSRNMILIHGDASFAGQGVVETLSMSDLTHYSTGGTIHVIINNIQIGFTTDPK  
 SARSSPHPSDAKTVGAPIFHVNGDDPEAVAFVSRVAVAWRQRFQKDVVIDIVCYRRHGHNEVDQPMFTQPVMYKRIK  
 DLPSTLNLYTQRLIASGVFSEAEELSSIRSEYARLEADWAASKSYKPKASDWLEKNWQGFKMAQLEGRAPTGPVLE  
 VLRVAVGKIVSTLPEGFAAHAGVARVYNNRLAAMQSGKNIDWALGETLAYATLVREGYPVRLSGQDCERGFTHSRHSV  
 IHDQNGAQYIPLRHISDQAFRRVTNSHLEAAVLFELGYSLEHPKLLVLEWAQFGDFANGAQVIIDQFITSGEAKWY  
 RQSGLTMLLPHGYDQGQPEHSSARLERFLQMSDEDPYIFQSDPWKQEQAINYSVANITTPANFFHLLRRQVVRDRKPL  
 VVMTPKLLRLKECASNIEDFAPNQAFRRVIPNTVSDATKVVQDDKIRRVILCSGQVYYDLAEARSKRELESTIAIVRVEQ  
 IAPFPFLEVRDHAIAKYPNAEVMWLQEEPANMGWSVFEPRRLTILREMGVVELTVRREPKEYVGRKVAASPATGFSKV  
 HEEEQAAIINAALTI

>Andalucia\_godoyi@prot\_15

MSSSLVTKRDGSSVDFDREVLRSRIVPLCDGLDLTWVSIDLILDKVASGAPSLVTTTKIDELLAETAAYLTPQHPDYSLV  
 AGRIVTALHKTTTPSKFSETTLLRNYPNPQTGTPAPLVSQELFEYVLEHKDVLDEAVDDSRDLGYDFGFKTLEKSYL  
 LRDGRVAERPQHLLMRVACGLNLSVSEVLSTYDMLSRRLYTHATPTLNFAGTPRPQLSSCFLVMSDDSDIVGIYDIL  
 KECAMISKYAGGIGLSVHPHAKGSYIAGTNGVSNGLVPMPLRVFNDTARYVDQGGRRKGSFAVYLEPWHADIFDFLD  
 LKKGTGKEEMRARDLFYAMWIPDLFMKRVANATWSLFCHECPGLYESWGSTFETLYEKYEAAGKARRVKAQEL  
 WFAILESQMETGTPYMLYKDAANAKSNQNLGTIRSSNLCTEIIQYSSEETAVCNLSIALPRFVSQIKNESEELSFDFE  
 QLYNVTRLVVRNLNRVIDVNYYPVEKASRSNFRHRPVGLGVQGLADVFMLLKMPFESEVARNLNREIFECLYFAALSE  
 SCALAEQSGPYETYPGSPVSKGILQFDMWAKDRVVLVSGRWDWDGLRQRIHTFGVRNSLLVAPMPTASTSQILGNNECF  
 EPYTSNIYLRVLAGFPPVNNHLVRDLIRLNLWSEKMRSNIIASSGSIQNISGIPDSIKEIYKTAWEIKRIIVDYAADRG  
 CFIDQSQSLNIFMASPNSKLSLHFYAWKLGKTMGYLRTPAADAIAKFTVDSSVVVSNVKNADSSNTAENPAA

>Andalucia\_godoyi@prot\_17

AIRSQWRIYQCLSKYKLSLVLVSAGFGFFSAGGSLLSVALPSLILGTGFQASSANTLNQLLEVQDSVMMRTRKRPLPT  
 GAVSPRAALGYAIASAGVGSALLFAGTNLVTALLGVSTIVLYAGLYTPMKMMSKWNWTWIGAVVGAIPPVMGYVATQ  
 ATSADAWAVLSTDPAPWILGAVLLFWQMPHFYAISWMCKKDYASAGYKMISVTDPASTGASLRNTLALFPVFAAV  
 AVGMCDPWFAATSSIVNGYYTWKAWFSRQFGENAEESTRDQAARSLFKASIMHPLLLLALLVIHDNRKTKESAKND  
 GEAKDPDE

>Andalucia\_godoyi@prot\_18

MFGAFSKKFTAKNERVAKVTFQVAGMDEAKQEVMEFVEFLKTPERFRKVGAKIPKGAILMGPPGTGKTLAKATAG  
 ESGVPFFSISGDFMEMFVGVGPARDLDFKEARSQAPCIVIDEIDAIGKPRGRGGGFGGNDERENTLNQLLVEMDGF  
 GENSGVVVLASTNVPLDGLDRALTRPGRFDRIHWDRPEKSERVQIFMVHLKGIKLNPEVSVDRIANRNLSELTPGFAGAEI  
 ANVVNEGALIAARRSAAVLDLDFEAAIDRVVGGLEKRSVLSPEEKKIVAYHEAGHAVTGWFLSNCDPLLVKTVIVPR  
 GVAALGYAQLPKEDFYIRTEQQLLDSLCMALGGRAAEKISFNHLSTGAQDDLRRVTDMAYNVVSQFGMARDDDH  
 RLANLSFRRPQSGQMETQKPYSEDTAARIDHNKVSIVNAAAAKTENLLREKQYQYLVNVAEHLLEKLVHFDLLEKMLG  
 PRPRPSASFPIIN

>Andalucia\_godoyi@prot\_21

MTIKLVLMGAPGSGKGTQAPKIKEEFCLCHLSTGDMRLRAAVAAGSALGQKVKATLESALVSDDLVDLIKDNHSTE  
 CKNGFILDGFPRTVVQAQKLDLSDMLGADKLDVIELKANDELVIKRISGRLLHPASGRVYNFAFFNPPKSPMTDDVTEPLI  
 VRKDDAEPVVRKRLEAFHAQTVPVLDYYHKKGILTTLDADQGVNKKVYSIQIKILNSCKNNQAKKHA

>Andalucia\_godoyi@prot\_24

DPAHAHTHTHATNNPMTGEVYSSRYHELLATRKRLPVYEHQSTVLSLVSQNRATVIVGETGSGKTTQIPQFLALDPQFL  
 SSSPSVSPASPHFSNGAAAGPMCVACTQPRRVAAMSVA TRVAEEMDVELGTA VGYSVRFEDRSTPGVTRKLYLTDGM  
 LLREAMFDPLLRLSRYSVIDEAHERTVATDILMGLLGLLFGSNGDANGKGRKAARPDRLRVVMSATLEARKFQYF  
 GGAPLLSIPGRMFPVQVYAPEPVRDYFQEAVRTVLSIHRTEPVDGGDILLFLTGEDEIEDACRRLEGESGSLCLPLYS  
 SLPPAQQQKVFRTGPGVRKVIVATNIAETSITIDGVVVFVDPGFVKQKIFNPRTRVESLQVTPISQAAADQRKGRAGRT  
 RPKCYRMYTEASYASDLMPQSFPEILRTNLAMVVLQKKGIVDDLVHFDIDPPAPEVMMRALELHSLGALDDDCN  
 LTHDGLLAEFLLDPQLSKMIVASPKFHCNSNEAVILASMLSVQPPFVRPKEKDREREADESHRDFQIAGESDHLTLLEVY  
 TAYKSQPRSSVDVWCRRLYLNRSLRMAADDICTQLVRLMQLKRLPLLSPRDSRELYASVQKTVAHGFMMQVAHLERAG  
 FWMVVKDNQPVLLHPSTISITYKPEWVYNEFVWTSQKYIRTVTAVSPEWLIEAAPHFVAVNEDEFPEGEAKRILARIWK  
 KVHDKQLAAVTWIDRMLRLAFERYPIV

>Andalucia\_godoyi@prot\_25

MPALSPTMTKGNLARWRKKEGDKFKPGDILCEIETDKATLEFEMTESGYLAKILAVEGTQEVSVGSAIAVAVDSEAEIA  
 GAKNYSNTASSASASASAPAPAPAPAPASSAAATAASTPASSIPSTVAASSNASAGDRVFASPYAKKIAGENNVN  
 IAEVKLNSGPRIVSADVNAHLASRSSAAQETAGAASTASSISAAAGAGNVFTDVSLNAIRKRIAQRLFESKSTIPHYL  
 TVEIEMDALLAVRSALNESLNSNLLKDKKAKLSVNDVFIKAASLANKLVEANSSWQGSFIRTFHNVDNTNIAIATPNGL  
 VAPLIKGTDTKGLVDISSAVRELAADKAKDGKLSPEELQPGFTTISNLGMFGVSAIINPPQSCILAVGSAKKAVLVNE  
 DAAKNSAERFREATVLNATLSCDHRVVDGAVGAQWLQHFKRLLNPSQMLL

>Andalucia\_godoyi@prot\_26

HPFLSEASNVIDGSVDTSEAYRKNYAYNHGLAQLTQQRIAHVKLGGDEKAREKHVERGKLLPRQRVELLLDPGSPFL  
 ELSQMAAYNVNEDVPAAGIITGIGRIHGRECMMVANDATVKGTTYPLTVKKHVRAQEAHTNNLPCVYLVDSSGA  
 NLPNQAEVFPDRDHGRIFFNQANMSSAGIPQIAVVMGSGTAGGAYVPAMADESVIVRKNGTIFLGGPPLVRAATGEV  
 SAEDLGGADLHCRTSGVTDHYAYDDRHALYLARRIVSNLNTYGGQSGKKVDFMRRDSEAPLYDAAELYGVIPQDVRQP  
 YDCKRIISRLVDGSRDFEFKAMYGDTLVTGFSKIYGMVPGIANNVLFSESVAVKGAHFIELCAQRRIPLFFLQNTIFMV  
 GRKYEAGGIAKDGAALVMAVACAKVPKITLVTGGSFGAGNYGMCGRAYDPRFMYMWPNSRISVMGGEQAASVLAQ  
 VKRDNIEKAGKQWTAEEEEAFKNPIREKEYEREGDPYYSARLWDDGVIDPAHTRQILGLSLACYNAPIEQTTFGVFRM

>Andalucia\_godoyi@prot\_32

DVQLEVREGQSLVALQGPFAHRYLKPILSATGAPALEKVSFLQSFITIPRLDKNARITVSRLGYTGEDGFEISVPDKFV  
 NQFCQMLLDKALQDTSKVEWAGLGARDVLRLEAGLCLMGHDMNPEINPWEANLGLWIGKRRRQEKGFLGDAVLF



GEQAQPKQIRVGLVVDGMPAREGAVILGEGNGKITSGPCSPCAKLNIAMGYVDTKQAVAGTKLKVQVRNKELDAVVT  
EMPFVPTRYRAPKE

>Andalucia\_godoyi@prot\_33

MWEALRKKPEVDVVVIGGGATGSGIALDASLRGLKTLLEADDFGCGSSSRSTKLVHGGVRYLEKAVKDLDMGQYH  
LVREALAERGVLRIAPHLAEALPIMTPLYSWLEVPYVYAGLKVYDWLWLSGSASLHSSYYLSADEARKTFPALRAHDLK  
GAVVYDQFNDSDRMNVSIALTAAAHGALVFNHMFVSDLLVREVATDGSKMFQRGGAKGAKNIVDFEKKPGDAGD  
GGEAIVPKYRKEVSGVLRDPETNATLAVSAKVINAAGSFSSSIRNMDPTSATREEALSNAKEKSKERIGSVGIHVLD  
KEYSPSTMGLIPKADGRVLFVLPWMGKTLAGTTDRPMKITDNPSPNEDVAYILEYINKYLDVSAGPKDVRSAWAG  
VRPLAHLDEKSVVDGTANVSREHAIDVSAAGLVSITGGKWTYRRMAEESLDEALRVAGNKIAYPASCCTTKYQIIGA  
HGYSVDLAGHLEKEHLEKEVARHLAQAYGDRAVEVLSMDPSGKRAKITSQALPALEAEVLYAVRKEWASNAIDVLCR  
RTRVAFDRAGAMSADRVAIMGNELKWSASRRKEEAATRYSIATMTGLSD

>Andalucia\_godoyi@prot\_34

MLEVDWTAAGGWGAPRIVPYHNLSPASSSLHYALQCFEGLKAYVDDQNRQLRFRPEKNMERMISSCARLSLPTFDGK  
ELLESKLLVLEKSWPKARGYSYLRPTCISTDTLGVGSPQAAKLFILSPVGPYKKEGFNPVRLFADDKNVRACVGG  
TGGYKIGGNYGGTIPQKQAASKGFAQVWLYGDRQYVSEVGTMNFVWLKNEKGERELVAPLDDGTILPGVVRD  
SILALARKEHADEMKVSERLFTIADLTKAIDEGRVEECFAGATAAIVSPVKGIHFAGKDYIVPIDEKLNAGKFTSLLANKI  
MDIQYGRKPSVSVVQ

>Andalucia\_godoyi@prot\_35

ADGKEAAWNTGGSGNGSGSSERGPLSWKSAALQLGLMTIAGGGLYYWDQEKRQKATASSKVQSYGGVKIGGPFSL  
DITMKRTVTEEDKGFALYFGFTMCPDVCPTMMDKLTAAVNRIEKRYGSGIVQPVFISVDPKRDSPERIKAYLADFHP  
SFIGLTGTDYQIADVTKFRVYWSKPDSSAGDDYVVDHSIIMVYLHPSGFEIDYYGKNLNADEVYQKLTAHIEKYMDS  
KK

>Andalucia\_godoyi@prot\_36

MISRRLFSTAVAAGSRVTLPFGDIGREISSALQKVFATAASVPVWDTYDVGAEAAERTGSLITKEALDSVLRGTGVL  
KGPTATPIGKGHKSLNVTLRQTLDIYANVRPAKTIAAVPTRYEKVDIVVRENTEDLYAGQEAVIDGVSISLKIITEKAS  
TRIAKYAFEYAVANGRKKVSAIHKANIMKLTDLGFLECCRKVAKEYPQITYDERIIDATCMMLVQDPTKFDVMVLPNL  
YGDIVSDLAAGLIGLGLTASSNYGQKAVLFEAVHGTAPDIAGKDLANPSALLFSGAMMLRHLGLKTHADQIENAVLK  
TLKGSVKTDLGGNSTCSEFTNHVIKLN

>Andalucia\_godoyi@prot\_37

MLLSRFLWPPTASAAATGTGTSPSPRKRFLVCSIIALLTSSKLVAVCIPLSLKYAIDSLSAAPTSTVTLTALAAVACY  
GGLRILSSLFSELRSALFSRVSEHSSAVLLAASHAHLSTLPSPLAATSPALLFRTIERGVDGLSFLLSATALHLFPFLELS  
LACIVLSSLLSPFYAIGALASVGIYGGFTLVWTKARTVIRRRMNEADNRATTAAMDSVTNYETVRYFNELLEKGRIG  
ALLKAYQKEAIAAHESLAVLNFQGAVMALAVASMMGASVVGANGTCSVGDVVLVNGLLMQIAVPLGFLGSLYRE  
IRQSIVDLEALIVLLKMEPAVAAQQQQWFLGGEKEETARIFATREMAESSNVTLSHLSFAYPSPSPSTSSSTSSNPSSSSS  
SSSSSSAPSSSLPERMVLTDVTFVSVEAGTSVGVGPSGSGKSTLTRLLYGLLTPTSGDLLGSASLRTIDADSRRFVGV  
VPQDIVLFDNLLHNILYGDAEYRQRRENGDACTTLGSLPAAMKDRLEDVLRARLLELVQRLPMGVESVVGGERGM  
GLSGGERQVVAIARMLKADAPILVCEATSALDSATERAVMDALRDLAKNRTAVVIAHRLSTVVMCDKIVVLDQGRIV  
EEGPHHELLANGGLYARLWKQHQHDLRPTVDKKHESF

>Andalucia\_godoyi@prot\_4

FRLLSRRLFSSNSFTPSDVLNRNTRNIGISAHIDSGKTLTERILFYTGRIHEIHEVKGDGKDVGAKMDSMDLEREKGITIQSA  
ATYCTWKGQVNIIDTPGHVDFTEVERALRVLDAIMVLCGVSGVQSQSYTVDRQMRRYGVPRVAFVKNLDRQGS  
PFRVTQQLRDKLKLNASLLQVPVGVVEENFRDIVDVIREQTMHFEGDRGEKLVSDTIPTVEVRVCKDIRQELVDRLDGID  
DAIAEQILNEEHPSAEQIEAAIRRQTLALKFTPVFCGSFAKNGIQPLLDGVLKYLPSPEKAINALRITQGNDELGNPSTV  
ETPITLSDPSLDCVALAFKLDGGRFQGLTYVRVYQGLTRRGDNLVNVSSGKFKVPRLVRMHSNEMEDVEELSSGEIG  
AMFGVDCSTGDTFLSGNSAEKIAMSSMFVDPVMSLAVAPTCKDTASNFSKALQRFSKEDPTFRVSDPEAKTTMIAG  
MGLHLEIYVERMKREYKCDVTTSAFYVAYREAITGKVTFDYTHKKQSGGAGQFGRVAGYVEPLPNAETKFEFVNGI  
VGNAIPPAFFPAIEKGFREAVTKGPLIGHVPVWGRVVLTDGAAHSVDSNEMAFRMAAMGAFRSVFAATSGEARPVILE  
PVMKVQVSAPVEFQGVVMGGLNRRKGTITNATTESDFVQIDCDVPLAAMFGYSTDLRSATQGGKGEFSMEYKQHSPPV  
QSSQEELINEYKKKRDEAA

>Andalucia\_godoyi@prot\_5

MSNERVYDNETFLFTSESVTEGHPDKLDCQVSDAVLDACLAQDPNSKVACETASKTGMVMVFEITTSVLDYQKIVR  
EAVKNIGFDSSDKGFYKTCNVLVAIEQQSPDIAQGVHVGKDEELGAGDQGMFGYATDETPPELMPLSHLLATKIAA  
RLAEVRKNGTLPWLRPDGKTQVTVEYTKDAQTKALTPVRIHNILISTQHAPEVDNETIRAAIEHIIKVVVPAKYLDNET  
IFHINPSGRFVIGGPDAGLTKRKIIVSYGGWAGHGGAFSGKDPKVDRSACYMARWIAKSVVASKLARRALIQLS  
YAIQVADPLSINIETYGTNAIPEAKILEIHKNFNCRPYQIHKELNLRPIYSKTAAYGHFGRELPFTWEHPKQLNVE

>Andalucia\_godoyi@prot\_6

DFDFFSNDESARTRTSPWRRTRIICTIGPKTQSVDMKLQLLDSGMNCRNLNFSHGSHEYHQQTVDNIKIARQEANKICSIL  
LDTKGEPIRTGNVDPSIEGGEFVLKKGQKLTVEAGKEAVKPKCTPERIAIDYENAVKRLKAGGSILINDGMLGLKLVLEFV  
PDENRCVCEVMNTSVFSSKGVNLPGEVVDLPAMSEQDKLDIAFASKNWLVDYVAASFIRCADDVHAIRKLLSSDKERH  
GHNVKIIAKIENQQGLDNFDEILAAADGIMVARGDLGVEIPFEKVCLAQKMMIAKCNAAAGKLVVTTATQMLETMIYSPY  
PTRAEATDVANAVFDGTDVMSAETAKGAYPLEAVDRMARICAGAEAVFDNQGVFHS�HDRASKLQSLDEAIALS  
AVKTDNDLGASLIVTYTNSGRARLVAKYRPSALVFCMTPFDRTARQILAYRGL

>Andalucia\_godoyi@prot\_7

MAAVPGYISDRVSIFERLWAEHEKEIAAAKERNVAITITLPGDSAKQGIKDVTTPEIAAQISKKLGQEAAILAHVVFEGDA  
QAAPPADFDDATDTAGAAGAAGEKDAEAKGIEWDVQVPLPASCCKLTLFTYDSEEGKEVFWHSSSLLGAALAVYP  
DVKLNRGPPLEDGGFFYEGGMSGVREEDFAKIEKYVEGFTAGRHPFQRLLVKKSDAVELFKYNNPYKMHILTRVAD  
DGFCTVYRCGSFVDPCKGPHIPATNLVRAFVKVTKNASAYWLNDATKDSLQRVYGISFPQKMLKEWITFQEEAAKRD  
HRKIGKDQELFFFHNLSPGSCFWLPHGGRIYDRMLDYIKGLYRVKGFDFLVVTPNVYVNDLWKQSGHWQNYQEHMFA  
FEVEKEVFALKPMNCPGHCLMFAHRTRSWRELPIRFADGVLHRNEFSGALSGLTRVRRFQDDAHIFCMSSQITSEIRG  
ALQFMKEYVYGFGLGFELRLSTRPAKFLGDVELWNRADQLREALGFEFGEPPVSNPGDGAFAFYGPKIDVTVLDALKRKH  
QCATIQLDFQLPIRFNLEFQGESSVERPVMIHRAIFGVSVERFIAVLTEHTAGKWPFWVSPRQVILVPSVEHYLEYAMEINT  
RLLEKGFVSTVDTTDRTLSSKVRQAQLSQHNFILVVGKEELEAKTVNVRTRDNVHVHGSKTIDDLVADFKQLCAEYK

>Andalucia\_godoyi@prot\_9

MLRFASSSVRRRGFASSSFWKYVEEGPLDANKATTVALKADPNPNKVNNGEGIYKDDTGKCPVLPICIREAEARLAKAN  
ADHEYCPISGIPSFCKSASQFAFGADSSLFKENRIATVQTLSTGALRIGADFAKFLPKATPVFISDPTVWNHRLAFQTA

GCEVRTYKWDKAKNALDIDGCLKDLRNPALRSVILLHACAHNPTGIDPTMEQWKKISDACLERNHIVFFDNAYQGFA  
SGDPDKDAAGFRHFQGHQLIVAQSFQAKNMGMYGERVAGALNIMTGSQETTAVDSQLKIIIRANYSSPPLFGARLVDM  
VLSEPALKKQWVFDVKEMADRIALMRSSLVQNLGKAGSKLDWSHITNQIGMFAFSGLGEKQVMKLRSDFSVYMNKD  
GRMSIAGINSRNVVEYLAKAIEVTRS

>Andalucia\_godoyi@HsIVU

MKPKDIVAELDRFIVGQHEAKRAVAIALRNRWRRQQLTDKLAQEVSPKNILMIGPTGVGKTEIARRLARIAQAPFIKTE  
ATKYTEVGFHGRDQIIRDLVDVSIQTRNLIKDQKPKIHKIERRILDKLVGEDASPATVDAFRKVLADGDLENREI  
EIVVTEKVAQANPEPQGGMMNVNDLVVKKLGLAGPRMSKKLPIKDCRALLEEEELDKMLNHETVVRKAVRNVEENGI  
VFLDEVKIVTKSEYRYGTDASSEGVQRDLPLIEGTTISTKYGNVKTDLHILFIASGAFHHVKPSDMLAELQGRPLIRVEL  
KGLNQQDLYRVLTEPEFNLIKQQIALINSEVSLFTDDAIREIAAVAFEVNSTVENIGARRLATILERIMEDISFNASEYA  
GQGMTVSKESVRQKVGDMLLKTDLSKFI

>Andalucia\_godoyi@Hsp78

MIMLRVCKRAFFSVPKRPIASLAQPWLHACAGVPDVLAVRYAPVKGRRFYSQSPSGPNMNAWVSPDAQPAGANLK  
KFTVDLTKAKDGILDPVIGRDEEIRRMIIQLSRRTKNNPVLIGSAGVGKTALAEGLATRIVDGLVPDSMKNKIVLSLDV  
GSLVAGTSMRGEFEARLKGIKLDIEKDKQYILFIDELHLLVGAGQAEGGNMDAGNMLKPALARGEIRCVGATTLDEY  
RYIEKDAALARRFQSVVVAEPTVEDAISLRGIKERVEVHHGVRIADGALVAAAQLSHRYITDRFLPDKAIDLIDEAAS  
RLRLQQESKPEQVEAQEKKIIQLKIEREALRQESDKASKQRLTTLESDLAAREKEFNQLVGQWQAEKRKLEAKSFKQK  
IEARRELDNAQRMGWTRVAELNYSVIPHFQQLAEELEQQQVAAASAGGRLVSVSTVAEDIAAVIARQTGIPVAS  
MVQTERDKILHLEDTLRSQVVGQEEAIHAVANAIRLSRAGLKSASRPISNFMFVQSGTGKTLTVRAIAQALFNSADAM  
TVINMAELGDPQLSAGSAGYVGYEGLLTPVRRRPPYQVVLDFEFKAHRNVQHVLLRIMDEGFTDGHGRK  
VDFRNTLIVLTSNLGSEALAAAMPENTPRKQKDAVMEAVREHCAPEFINRIDEIILFNRLTMKDMHAITELRIKEVAANL  
SDRGIGLKVDSLAKDWLSRRGFDPAYGARPLRRVLLQSSLLSPLAVKMLNGDVPEGSTVQVTCNPVTADVVLEQALQ  
FTISPP

>Andalucia\_godoyi@mHsp60

MLRRTVASNLRFATGKDIKYGVEARDLMLRGINKLADAVQITMGPGRNVIIIEQAYGSPKITKDGVTVAKNIEFRDRH  
ENLGASLVRGVASKTNDAAAGDGTATVLTTRAIFFSEGCKAVAAGMNPMDIKRIGDKAVASVVAHLKSQSKSISKA  
AQVATISANGDTAIGDLIATAMERVGKEGVITVSDGKTLVDELEVVEGKMFDRGRFISPYFINNPKTQKVEFENPLIFVTD  
KLLSSLQSLGVLEEVVRMQRSLVIAEDVDAEALTTLVNKLRRGLKVAAVKAPGFGDNRKANLQDIAVLTGAQVLS  
EEVGMKVEEANLGTCKKITISKDDTILNNGGDAQRERVEQIKDANLTTSEYEKEKLVQDMLAKLNGGVAVIV  
GGASEVEVGEKKDRIIDALNATRAAVEEGIVAGGGSALLYASRELDKLQGENFDQGVGLKVRNIRVVPARTICDNAGH  
EGAVVVQNILSHQGSFSYGFNAATGEYVDMIKNGIIPVKVVRTALSDAASVSSLLTTTECMIVDLPEEKTAAPAAGM  
GGMGGMGGMGDMF

>Andalucia\_godoyi@mHsp70

MFRASSRFISRTGLRPRVFSAAKSDIIGIDLTTNSCVAVMENGTNPRVIENAEGMRTTPSIVAFKTDGQRLVGGPQAKRQA  
VTNPENTVYSAKRLIGRAFDDAEVQKEKKMVPFKISRHTNGDAWVEVMGKGYSPSQIGAFVLMKMKETAETYLQRPV  
TQAVITVPAFYNDSSQRQATKDAGAIAGLEVLRINEPTAAALAYGLEKGSNKTVAVYDLGGGTFDISILEMGNVGFV  
STNGDITLGGEDFDQTLMIYLNDFKQHQHIDLSGDRLAMQRLKEAAEKAKIELSSAMTNEINLPFITADASGPKHLM  
SLTRAQFEKLSLMDRTVEPCQKALKDAKLSPADINEVLVGGMTRMPKVAEVVRKIFNREPKGVNPDVEVAVGA  
AIQGGVLKGEVKDVLVLDVTPSLGIEITLGGVFTPLISRNTTIPTKKSQVFSTAADNQTQVSIKVLQGEREMAADNKVLA  
QFDLIDLPPAPRGVPIEIVTEITPDSIVEVSARDKATGNVQKVVQIQSSGGLRKEEIERMREAESHKDADKKRKLVEV  
KNEAESIIHTTEKNINQYKDKVDAAVVDGCRKAVAALREAMTKDDLEAVRQATTAVQQASMKIGEAFYKATGGSQST  
GTAQEQQKNTMDAEFKKK

>Andalucia\_godoyi@mr13

MSTSAFPRRTGLLATKIGMTAEWDANGTRVPLTVLRVPHAVSQQVKTEDTADGYTALQVGVTVGVSKHISKPVTHGL  
AKAGIAPRGAIAEFRVTEGELLVPGSMLSVLHFVPGQAVDLRGVTTGKGFQGVGMKRWGFGGLAASHGVSVSHRSHGA  
TGQRDPGRVFKGKKMAGHMGHEWRTIQNLRVYKVDPSRGLLYVKGVPDRAVVHVEDAIKNRDQLSLLPFPTRI  
LADGEDLASMKPEVMSKILTTRIIQTQVRSAPKIPGQAKTAQKGTAEKK

>Andalucia\_godoyi@mtif2

MFRLLSALVCSRFIGDVGISKPLLRVGGAAARFFASTGGFASRRGGPAASKNNNDDDGYDGPYHSGSKSNRVQKMK  
SAATSKSSRSAPRHGHSSKREEVAPEKTVRIVDSMSIREFAVALGIRPKILLKNLTSNAKSQYYNQKVKEEDIMNPYEA  
EIAMDMVMPIRAFATAAETLQGVSSSFTTKESPFSAHNVANGTSGAPAATHNQSSHGSSALSYGELLQKYNPVFTS  
EQVSQFPLRAPVTVMGHVDHGKTSLLDALRNTNIVSHEAGGITQHIGAFRCSPDSAGGTYITFIDTPGHAAFSAMR  
AKGAQCTDIVILVVAADDGVMPQTVVAISHAKAAKVPPIVAVNKIDKSGAEKNLSRVYQELMEHGLVPEYGGDTTV  
LVSAKRLNLDKLLAEIDFQAEILNLKAPVQGRARGVLEARLHKSMGPIATVLRMGTLKVDVAVGAFGKVR  
MRDPSASELLVSHAHAHQHDLAECSPSPVCSISGFKELPNAGDVMVVESEQEAEREIAERSKGAIEQRKQYQFDLSKL  
SSVADGASESMQKKEIPCIVKADVSGSVEAVVAGALAKLNHPEITLKVHAGVGPVSASDIALSEACMADLPAVVIAFNV  
RVLARSPGVVVRPYRVIYHLVDDMKQHLADFLDPRTEESILGKAAVLEIFNISKRTNAAAANANVQGRVLLVVGCKVV  
DGMLWGGKADALYRIYRKGSLLAEGLRVTLKRFQDDVDKVAKGNCEGLLELDGSGIEPQRDDEVICVELKNVVR  
TWDEDVVPQSAASVKEELVRKHR

>Andalucia\_godoyi@nad10

MTVNNKAEFVVSQMDQLVNWARTGSLWPMTFGLACCAREMMHSAASRYDLDRFGIIFRPSRQSDVMIVAGTLTNK  
MAPALRKVYDQMSEPRVVSMGSCANGGGYHYHSYSVVRGCDRTI

>Andalucia\_godoyi@nad11

MVIVFVDGHQVNVEKGGSTILQACAQVGVVEIPRCYHERLSIAGNCRMCLVEVEKSAKPVASCAMPVMEGMKVFTNTN  
LVKKAREGVLEFLINHPDLCPICDQGGEDLQDQAMAYGSDRGRFYEFKRGVDDKNIGPLVKTIMTRCIHCTRCIRFA  
AEIAGVEDLGTVGRGRDTEVGTIYIEKAFQSELSGNVIDLCPVGALTSKPYAFTARSWELKSTESIDVLDALGNSRIDVR  
GSEIMRILPRLNDDVNEEWISDKTRFAVDGLKRQRLTPMIRQNDQFIQVSWEDAFETIRKLSQSKVQAFAGDLADT  
ESLVVLRDLFHLGTQKQVSLAIPHTLSPDLRVNYLANTTLAGLESDVCLLLGINPRFEATLVNTRLRKSVLLNQLSVY  
SIGNEVDLTYPHTHLGNDAVFAQIVGGRHPFCQVLRKAKKPTLLIGKAFLETQSFSLVEELTRYLPLVQKDWNGVNV  
HLHASSVGLSDVGYQSHSSDYFKNDSVQMTYLLGVDDAEFVRQVRQQSEFVVYQGHGVDVGLYADVILPGSAYTE  
KTSLYVNLGRPQKTKLAFYPAGEARQDWKILRALSEYLVNSLPHYDDEAALEKRLSEIAPHLSSIGIKQAD

>Andalucia\_godoyi@nad7

MNFGPQHPAAHGVRLVLELNGEVIQRADPHIGLLHRGTEKLIYKYTYLQALPYFDRLDYVSMMSQEQAYSLAVEKLL  
QCQVPLRAQYIRVLFGEITRLLNHLAVTCHALDVGAMTPMLWGFEEKLMFEYERVSGARMHAAAYVRPGGVSQDL  
PLGLCDDLFTFAEQFSSRLDEEMLTNNRIWRQLVDIGIVSLDEAMA WGFSGVMLRASGLPWDLRKHQPYDAYHLV

DFDVPVGTNGDCYDRYLIRVEEMRQSLRIIMQCLNQLPEGVVKVDDKKISPPSRSDMKQSMESLIHFFKLYSEGYSVPA  
GETYTAIEAPKGEFVYLVSDGNGKPYRCKIKAPGFSHLQGLDMMSKGHMIADVVTIIGTQDIVFGEVDR

>Andalucia\_godoyi@nad8

MKLMERSAHLVFLSELVRGLVVTLLQYFFKEKVTLYNYPHEKGVLSRFRGEHALRRYSTGEERCIACKLCEAICPAQAITI  
EAEPREDGSRRTTRYDIDMTKCIYCGFCQACPVDAIVEGPNFEFATETHEELLYNKEKLENGDRWETEISANLSSEYL  
YR

>Andalucia\_godoyi@ndufv1

SLFSTAPPTAASTTPAAPAAPVKTGFGLDSEDRIFTNLYGERDVIYEGALKRGDWYRTKDLLSKGVDWILGEMK  
ASGLRGRGGAGFPSGLKWSFMPKVS DGRPSYLVVNADESEPGTCKDREIMRHPHKLVEGCLVAGFAMRAKAAAYIYI  
RGEFYNEALVLEKAVAEAYAKGFLGKNACGSGYDFDVIYHRGAGAYICGEETALIESLEGKQKPRKPPFPANVGLY  
GCPTTVTNVETVAVSPTILRRGSSWFASFGRKNNAGTKLFAISGHVNRPCVVEEEMSIPLRELIEKHAGGVRGGWDLNL  
AVIPGGSSVPLLPRKVCDDVLMDFDALRDVRSGLGTAAMVMMDKSTDVVKAIARLSKFYKHESCGQCTPCREGTGWL  
MNLMDRMVAGNAEMEEIDMLEEVSRIEGHTICALGDAAPVQGLIRHFRPEMEARIRQYKTSQQATLSAKH

>Andalucia\_godoyi@ndufv2

MHVDTDPDNNANTPFDFSPELYKRIDQILAKYPPNRKRSATLPLDLAQRQCGGWVPLAAMNKIAQLLEVAPIRVYEVA  
DFYSMVNRKPVGKYHLQVCVTSPCMVKGSDLELHLEKHLGIHLGETTADGVFTLGEMECMGCCVNAPMIAVADYSN  
PPEWRYDYEDLTTETAIVVEALRKGDKTLKIGPQNGRKNCEPQGGKTSLFGEPGPY

>Andalucia\_godoyi@nsf1

MTRLFSPVIRSSSSLLSKRLLSTLSSSVVTTDEGRSIYLDLQATTPVDPRVLDAMIPLYTFQYGNPHSRTHMYGWETQ  
DLVEQSRQVATLIGASPTDVVFTSGATESNNAKLAGFYGQKRRHIITQIEHKCVLDSRHLQKQGFVYTLVPSA  
SGIVDLKLLKRSIQPDLTVSVMAVNNEIGAIQDMPAIGKLCRENKVFHVDAQAQVKGKIPVDVNEWNCDLMSISGHK  
VYGPKGIGALYVRRKPRVRLPIIHGGGQERGLRSGTIPAPLVVGFGTACKVAKEEMTRDSAHTKLARRLYDGMTQRI  
QHVQLNGPPLGDPMPRYCGNVNLSFSFVEGESLLMALRGIAVSSGSACTSASLEPSYVLRALGVEEELAHTSIRFGRFT  
TEREVDFAIACAGQVDRLRQMSPLWEMVQEGIDLKSIQWSGH

>Andalucia\_godoyi@odpA

MPATALAEPSTTVTTSRDELFTFLRMTSLIRRVEIVSDQOYKARMIRGFCHLYSGEEAICTGMEALDQSRDAMITAYR  
DHGNHIVRGGSAEEVFAELFGRATGMSKGGKSMHFYNACKLFFGGNGIVGAQCPVAGLAFGAQRLGTGGVSVSC  
YGDGAANQGGQIFEAMNMAALWKLPAIFVCENNQYGMGTSTRRGSADDNYYSRGHYIPGIKVDGMNVLAVKEATRVA  
REYAVNHGPIVMEMSTYRYSGHSMSPGVSYRTRDEVQKVRERDPIERLKGIMLEAKAATEADLEAVEKEIKIQVDE  
ALAKALAAPEPEPSQLTADIYVGKYEGETIRMVEKS

>Andalucia\_godoyi@odpB

MSILSRRVSSFFLRRSFSSAPASPTATITVRDALNQAALDEELSRDPRVFMGEEVARYNGAYKITKGLHDKYGDSRIIDT  
PITEAGFAGITVGAALMGMRPVCEFMTFNFSMQAIDHIVNSAAKARYMSGGQLGAPIVFRGPNSSAAGVGAQHSQCF  
AWYGSVPGLKVLSPFNALDARGLLKAIRDDNPVVFLENELMYGTAFARTPEFDDVDFTLPIGKANVEREGSHVTVA  
HSRAVHTALEAAKLLAEKDGISVEVINLRSIRPLDIPTVIASVKKTNRLVTVVEGWPLFGVGAIEVAQIMESPADFLLDAP  
IERITGADIMPYAKNLEAMA VPPQPNVNAVKRTLGLK

>Andalucia\_godoyi@PCCB

MFRFSPFLRSAGAHRAVAFPERLATIRSTAQLGGGQARIDTQHSKGLTARERLQVLLDPPSFRETDALALHRCDFGM  
DKQKFYGDVSVTGSHTIHRVYVFSQDFTVFGGSLSAVHAEKICKIMDAAVKVGAPVIGINDSGGARIQEGVDSL  
ADVFQRNVLSSGVVPLSLITGPCAGGAVVSPALDFVLMRSGTSMFVTGPDVVKVTGETVTQEELGGASTHTAKS  
GVAHAADFNEFELLTATRELLSYLSSNKDQPPVVPSTDPWNRSCDALRFAVPDDPNASYNMKDVISQVVDNRNSIFEIM  
PDFARNMITAFARIEGKTVGIVANMQPELAGTLDIDSSVKGARVRFCDAFNIPVTFVDVPGFLPTAQQYGGIIRHGAK  
LLYAYAEATVPKVTVITRKYGGAYDVMSKHLRGDSNYAWPSAEIAMGAKGAVEIIFRGKNVEEETANYTERFAN  
PLKAAERGFIDDIAPEDTRKRIAEDLRGLRARKDVKNLCKRHGNIPL

>Andalucia\_godoyi@sdh1

MGLAQKGYDVACISKLFPTRSHTVAAQGGINAALGNMGRDDWRYHMYDTPVKGSDWLGDDAIHYMCKEAPSTVRE  
LEHMGVFPFRTDEGKIYQRPFGGQSLDYKGGQAQRCAAAADRTGHAILHTMYGQALKYNTKFFIEYFALDLLMDQD  
GACRGLVAMCMEDGSIHRFRANETILATGGYGRAFYFCTSAHTCTGDGNAMVSRAGLPLSDLEFVQFHPTGIYAGCL  
ITEGSRGEGGFLNGLGERFMERYAPTAKDLASRDVVSRA MPTVEILEGRGVGPNKD HILLQLSHLPAEVLRLRPLGISE  
AAIFAGVDVTKPIPLVPTVHYNMGGIPIWTGEAVTMKNGNPSIIPGLMAAGEASCASVHGANRLGANSLLDIVVFG  
RACADTVERKHKPGDKQAPLPADAGMQSLENLDRLRHSNGKYTVAEVRTSMQKTMQNHA AVFRRQDLLEEGVRKM  
YDIYGLDQHVRLRDRSMTYNTDLIEALELQNLMINAVQTMVGAERKESRGAHARDDFKERDDATWMKHTMSWVD  
LQTGKVKLGYRPHVNVNLDTDGVPFPQKRVY

>Andalucia\_godoyi@sdh2

MTKMMHFQIYRWDPEKNEKPYLATYPIHLNECGPMVLDALIKIKNEQDSTLTFRRSREGICGSCAMNIDGTNSLACK  
RIDTTQSSMKIYPLPHMYVVKDLVPDLSNFYAQHSIEPVMKKKTELHDSIEMHQTKDQRAHLDGLYECILACCSSSC  
PSYWWNSDKYLGPAILLQAYRWIHDRDDFTKERLSNLEDPFKLYRCHTIMNCARTCPKHLNPGKAIKIKKSISLFS

>Andalucia\_godoyi@SUCLG1

MLSSVTRRFHSSAKVFNAKTKVICQGFQTKQGTFFHSQQALEYGTRMVGVTGPKGGSTHLGLPVFNVM DARKATD  
CDASVIYVPPPYAAAAIEEVA AAEVPLVVCITEGIPQHD MVRVKS VLRDAGGRTRLIGPNCPGIKPGECKIGIMPGYIHK  
KGRIGVSRSGTLTYEAVAQTTAAGLGQSTCVGIGGDPFNGT NFDVLD RFLVDPETE GIIMIGEIGGQAE EEAQFLIDK  
KNTKPVVGFIAGTAPPGRRMGHAGAVISGGKGD AQTMRALRDAGIEVVNSPAQMGRAMKQLFEKKGML

>Andalucia\_godoyi@tufA

MAAKQKFERNKPHCNIGTIGHVDHGKTSLTAATKVLAE TGGALYTPYDQIDKAPEEKARGITINSSHVEYETVNRHYA  
HIDCPGHADYVKNMGTGAAQMDGAILVVSAAADGMPQTR E HILLARQVGVPSLVVFLNKVDMVTDPEMLEI VELEIRE  
LLDSYEYPGETPIIRGSALMALEGNPELGRNAILKLMETVDQYIPLPNRPVLDL PFLMPVEDVFSISGRGTVA TGRIEQG  
TVKVGEEVEILGLGKNTKTTCTGIEMFRKLLDSSQAGDNVGLLLRGLKREIIRGQVICKPGSIKPSYKFEAQVYVLSKE  
EGGRHTAFLSNYRQPFYFR TADITGNIQLPEGVQMVMPGDNVKVVLDIAPVAMVEGLRFAIREGGRTV GAGVVS KLIS

>Andalucia\_godoyi@TypA

MMTTTTMTIMAAVGSASRRCFSSSVVRDISKIRNLSIIAHVDHGKTSLVDCLLKESLSQRSGSTESERVMDSNQLEKERGI  
TILAKATELTFNGYTFNICDTPGHADFGGEVERSLSMVDGVALVDATEGPM AQTKFVLKALQAGKLPV VINKVD  
RPTARVGGPVENEIFDLFCQLDANDEQLDYVLYASARQGWCR TDWKDESVDVTAFFAAA VKRFPSPNDPTAAAFQ  
MLVSQLESNSYFGKCLLGRVQSGTVKVGQRIHSIAPNGDIVEDNRIMKILKRRQGM TQIAVDEAVAGDIVSIAGLPKSTV  
NSTLADLSIVDPPIPIDPPTISMMAFVNDSP LSGKDAKSKVSTMIRERLEKEVESNIALNLTISPNGEAFVVRGRGELQ  
LGILIETMRREGFEMSIYPPKCLFKDDGSEPIEEAVIDVEADYAGTVIEKLT LRKLGELKDYTT HQRSRLPF

>Andalucia\_godoyi@Coq7  
 VSRLLRVDMAGEIGA VYICRGQLA VL RDSAARSTVSHILSQEQTHLSAFEELVRAKRARPSVLNPLWKRLAFGIGVVTA  
 ALGPQAAMACHEAVETVIASHYNDQLRELHRMDATSTTRTQSLNEDAGEGVGELRETVRRFRDEEEAHRELGTAGG  
 AASAPMY PILSNVIRAGCKIAIQIAQKL

>Andalucia\_godoyi@ETFDH  
 MFRIFSNPVKIKISCSAVSKRFLALAPNVDREVMFEFDVLIVGAGPAGLATALRLKQLDSNLNVCVIEKGAEIGAHTLSGA  
 CIEMQAMNELIPDWKSLGAPIHQEAKNDYFVWLLNDKXHVRLPTPPMQNHGNYIVSLGAVVQWLKQCEDAGVDV  
 FPGFAAADVIVEDGQLRGVITSDSGIAKDGTVKDSFAPGVQLRARQTVLGEGRGSLTKNLDFKFLRKNADPQTYGL  
 GVKEVWEVVPKFEAGKIVHTVWGPMDMKTGGSWLYHWENNKVS LGFVVGLDYENTYLSPFQELQRWKKHPFIQS  
 LLEGRCISYGARTISEGGLQSLPKVSFPGGVLVGDSAGFVNVPKIKGTHNAMKSGMLAAEAVEAFNSGSSEATSYD  
 RLKNSVWVEDLHKVRNIRPAFQWGLPALAYSAVDTYLFRGRAPWTLHMKHADHECTKPAEACEKIAYPKPDGVISF  
 DLLTQLARSGTNHEHDQPAHLTLKDPAPVQKVNLPVYDGPESRFPKAVYEVYEGRLVINAQNCLHCKACDIKDPTQN  
 INWVVEGSGGPAYAAQM

>Andalucia\_godoyi@ndufaf9  
 MSHLTRGVVGRGGRSSVSGITATVFGATGFLGRYVVRNLGKMGSRVIVPFRGDEQGYRHLKLMGDLGQIVPVKYDPL  
 DPASIRNVLSRNLVISLVGASRNAHSSLDANVRLPEEIAIQAKQSGNVQRLVHVSALGASYDAESLFLRLKKGEDA  
 VRGSFDGATVIRPAAMYGVEDEFNSMAAAPKILGGFTPVWTQGHLLQPVVWGDVAQGHASVEDSAAGKVEEAA  
 GLEALSRIALMKRVFNWIGRPTDKIVPIPDVVDAALFSIKYLPRRYAPVTTEEIEYMRSNVVASKDALSLRDLGVAQ  
 APIEIAHQFLAMTYKRGGVFFDPELQK

>Andalucia\_godoyi@ndufaf5  
 MSQAALDRAVRVMQDEQLLPASKEIVSRLVDRLEDISRAFPKVLNLGGPADLVAPALAGSRSSVAEAVSTDMSQAALD  
 RAVRVMQDEQLLPASFHSTLVVDEESLPFEENTFDAVLSPLCLHWVNDIPGSLIQUIERSLKPDPGLFLGAMLGGDTLKL  
 RISLTLAQQERESGLAA YISPMAGFRDAGNLLSRAAFSLPGVDVDTITVPYPAFTLMQHLWFMEESNISKHRRGFISRD  
 TLMSAAAIYQSMFGNPEAAEGEEVLATFQVMYLIGWKFDASQPHAKRRGTAQVSMQELAKGLGSKIGEVH

>Andalucia\_godoyi@NifU  
 MFIQTEVTPNDLAKFKPGREVMGKRGRSNYSSPLETFNSLLAKRFLAIDGVHVSFLGPDFVTITKPKDATWATMKPDV  
 YASIMDFFNANIPHADDVEQPRDTAAQEGDSEVLLIKELLETRIRPVVQEDGGDIEYRGEAGIVKLVGACSTCSS  
 SATLKHGIENMLMHIPEVVAEVPVVDKEEAAGNKAFFDFEKSQNK

>Andalucia\_godoyi@PCCA  
 MFRTLDFSRFFSSDNLFGKILIANRGEIACRVIKTCRKLGI RTVA VYSEADGRSKHVRLADEAVCIGPAASKLSYLNMD  
 AIVAACETTGAEA VHPGYGFLSENNHFASKLDSRKAIFIGPPASAIAMGDKINSKIAKRAGVNTIPGFLGEVATPQDV  
 LRISNEIGYVMIKASAGGGGKGMRIAFNDKEALDGFRLSKEEAAASFGDDRMLIEKFVEQPRHIEIQVIGDKLGNLTL  
 PERECIQRNRQKVLLEAPSPFLDPATRKAMGEQAVMLAKAVGYYSAGTVEMLVDAKKNFYFLEMNTRLQVEHPVTE  
 MITGLDLVEEMIRCAAGKLSRTTQDQVINGWAMEARVYAEDPARNFLPSIGTLKTYVEPVGPGIRCDSGITEGAEISV  
 HYDPMICKLITHGKNREESIDILRAALDQYVIQGVTHNIPFLRDVMDHKRYKDGRIIDTKFIEVEYPPGFKGHVLTVEVAQ  
 EISKAAAVVEFLREENRYSAFSSGVSHEPSSDQYVSVVDSGLPAAVVKVSRCSRTGNLLVNDKPSNAKWLIDSVFYQ  
 DGDVTLQVLERHVTGGSVIQVMAQTRVYELDVKRSVAVKDLFVHMVVISKPDLSKMLVSPMPGTVIQVAVKPGDKVVIQ  
 EIVVVEAMKMRNLLRSPVDGIVKEIRCKAGKSVKVEEILVEFE

>Andalucia\_godoyi@PET112  
 MKAQSIKALDKTRFGVVKWDVVIGIEVHAQILSRKTLFSRSPSVTSAANENVSLFDAAIPGTLPRTNMHCVFQGIRTA  
 NVMNSVQPIKDRKHIFADLPYQITQFMPLSRGGALMIGAGDSRKRIGIERIQLEQDSGQSLHDEHPHFSFINLRA  
 GCGLMEIIEPGLIACASEAVEYVKKLQYLLRHAGTCDGSMENSLRADVNVSVRSAGSSALGTRCEIKNLNSFRSIRAI  
 EAEARQIELLESKGTVDQATMAFDVASGQTRVLRSKENAPDYRYPMPDPLPLRITEGVLEAALRDAAEHPETQISRL  
 RSTFGLSTYDVEVLMTDPATVHFFETCMQLGPKRDPKDISGSPVSPENLGNLIDAVEDRVVSGKTGKGMMLDMVSGD  
 TRSVKEMISSGNLRISFEPERVAEYLRSLIKDHPAEVSEYKAGRTRVFGFFVGSAMRQFKGKVDPHLVNSLARELLEES

>Andalucia\_godoyi@UQCRC1  
 MSSANLPSHILRYPSTKMTLPSGLRVATQERHGNTASLGWIDTGSRFENANNNGVAHFLEHVLFKGTASRPQAAL  
 EIESLGAHLNAYTSREMTAFYARAFANDVPKAVDIIADILQRSASEAAVDAERQVILREKQEVENNHYEAVFDHLHAV  
 AFQGSLLARNILGNEKNIRNMKRDDIVNYVNAFYTAPRMVVAAGNIQHEKIVELVSRAFEKVPTVSGSPLLDASGHA  
 SAGKVRVFGADVRVRNDEMHEAHVAIGFEGASVWNPDSVPLMVAQTMGLGWSRASAAGANMGSKLVQALVADDL  
 VSHVSAFNTCYKDTGLFGVYVVGKPGRLDDVAYEVMHELTRMCMKTTEEDVERAKAQLKAQAMMALDDNAAVCD  
 DIGREVLA YGRRISPAEMFALIDNVDAKVLRETMMKYVYDQEVSLAAIGPTESPLDNRFRRLTYMLRY

>Andalucia\_godoyi@UQCRC1  
 ETEAETDKTTGGQHEHGVLEQEEADDQNDAAVRRSFSGSSIQARSFSTEPVALYPASETRNAGYNPADYHVHVVGH  
 AHSQDPSKRALSYAVLTGGRFVYASMIRLLALKFIYSMSASADVLALASLEVDISGIAVQAVTVKWRGKPVFIRHRTA  
 AEIEEARRENSVPMRDQKDEDVQRPEWLVLVGVCTHLGCVPINNAGDHNGWFCPCGHSHYDISGRIRKGPAPLNLE  
 VPEYKFTTDTTIVVG

>Goniomonas\_avonlea@atp1  
 MAISASELTSILEARIKNYASKIDLKEVGTVVSVGDGIARVYGLDKIQAGEMVEFAASGIKGMALNLENDNVGVVIFGD  
 DSSIKEGDLVNRTRFIVDVPVGESLLGRVVDPLGQPIDGRGPLTSAATTISRRRVELKAPGHPQSVNEPMQTGLKSVDSL  
 PIGRGQRELIIGDRQTGKTAVIDTINQKTINANASTASGRLYCVYVAIGQKRSTVAQIVNLLDRNAALSITYIIVAA  
 DPAPLQFLAPFSGCTMGEFFRDNGMHCLIIYDDLKQAVAYRQMSLLLRPPGREAYPGDVVFLYHSRLLERAAMNDK  
 LQGGSLTALPIIETQAGDVSAIYPTNVISITDQFLFETELFYRGIRPAMNVGISVSRVGSAAQVKAQKQIAGKLELAQ  
 YREVAFAAQFGSDLDASTLHLLGRGARTELLKQSQFPLAVEEQVFLVYAGVVRGFLDALDLKIKDYETELAEIRSE  
 HSFNNGHALLTLVGEELAISESTEKDLWEFFSWFTSKFSGRKQS

>Goniomonas\_avonlea@atp2  
 SRSALRASQKALKLNASVVATRPSRGMEEAASGTAKPAAAGVKNKGRITQIIGAVVDVQFEAGLPKILDALVQDSELRI  
 VLEVAQHLGESTVRTVAMESTEGLTRGQAVIDTGEPIPIVPEGLGRIINVI GEPIDERGPVITRMKYPIHRAAPLFEQS  
 VEQEILVTGKVVDDLAPYAKGGKIGLFGGAGVGTVLIMELINNAKAHGGFVSFAGVGERETREGNDLYHEMITSV  
 QLGEKSSKAALVYQGMNEPPGARARVGLTGLAVAEYFRDEEGQDVLFDINFRFTQACSEVSALLGRIPSAVGYQPT  
 LATDLGALQERITTTKKSITSVQAIYVPADDLTDPAPATFAHLDATTVLSRGAELGIYPAVDPLDSTSRMLDPRIVGD  
 EHYNMQVQKILQDYKQNLQDIIAILGMDLSEEDRMTVARARKIQRFLLSQPFHVAEIFTGSPGKVFVLEDITIKGFTSIVQ  
 GAYDDL PENAFYMGDINEVTOKAEMEAAELANKRT

>Goniomonas\_avonlea@atp3

MLGIVGRNSLQGSRALALTRVVPQVPRDRGMAANAKVLKARLKTIGSIKRITSTMKMVAASKLRGFQTRMEQSRPLQQS  
IASVFDRIPEAEV AEGAAAAKPDGAHLIIGMASDRGLCGGINSIVKAIIRITKDNVEVEKKIVTVGDKPRALTRTHGK  
MFQFVNEVSKAPPTFLVAALLAEELNQIEYASCTLVYNNKFISAIAIYETTEIEMGTPAGLLARLPKFGQEYEFEGEDTNIM  
SDLIQMRIA VQLFNMSLESATCEQSARMAAMDGASKNCGEMIDKLTVMNRRARQAAITTELCEIVAGAEIAAS  
>Goniomonas\_avonlea@cox11  
RSKNKAGAA YAVAVVVAVGGLSYAAVPLYRFLCAKTGYAGTVKTDVDYSARAKPVSDSRLLVRFASQVSEGMPPWR  
FWPQQSEVYVQPGEAALAFYKAQNL TDEPIGVSTYNVMPDQAGNYFNKIQCFCFEEQRLNPHE TVDMPVFFFDPDFL  
EDPLLSGVDATLSYTFKATDTERIHEQLAQQAQPHVLKLLAKHSLDAKAQADA  
>Goniomonas\_avonlea@cytc1  
MASRLANAARAAVSRVPSAGGYATLAAAAGAAAAGTTLAFSDDALHFVNQPVSHSGPFEAFDTASIRRGYQVFSEVC  
ASCHGLKLIAYRNLVGTICTEAKAKELAAEKEYTDGPDDQGMFERPGLSDYIKSPYPNSEAAKAANNGAEPDLSLI  
TKGRHGGADYIFALLTGYREPPGVTVGEGQHYNYPFPGGKLAMPPPLICSGQVEYEDGTEASLSQMAKDCSTFLAWC  
AEPEQDVRKQMGIKVAALLFAMAGAGYYKFRFRWSPKRNKRLFFH  
>Goniomonas\_avonlea@DLDH  
MLRISRHTAFLSLRRTTGLRAFAAAAAGGKQDVVVVGGGPGGYVAAIKAAQLGLKVTCVEKRGALGGTCLNVGCIPSKA  
LLHSSDMFEASQKDFKHHGIIVDGVKIDLNAMMAQKDGAVKGLTTGIEGLFKKNKVITYAKGYGRLSGPNTVEVTKAD  
GTTESIDTKNIIAAGSEPVLPFLKYDEKVICSN TGILALDKVPKLLIVIGAGVIGLEMGSVWRRLGAEVEVVEFMDGVT  
PGVDREIANNFHKLLVKQGLKFLHSTKVTA AEIRADGATLTV EPAAGGPAKKMEADVVLAVGRRARTE DLGLEALGI  
ELDKAKRVIDDHFRTKLPNVY AIGDCVRGAMLAHKA EDEGVAVAEILAGKPGHVNYDAIPXXXXXXXXXXXXXXXXXX  
XXXXXXXXXXXXXXXXXXXXXXXXXXXXXXXXXXXXXXXXXXXXXXXXXXXXXXXXXXXXXXXXXXXXXXXXXXXXXXXXXXXX  
ARTCHAHP TLSEAVKEAAMACYDKPIHF  
>Goniomonas\_avonlea@DLST  
KSTALPTRFSVNTIALRTFAVKVIPVPSMGESITEGSISAWLKEVGDQVEVDEVVCEVATDKVNVEIRSPDAGVIKELFA  
DIDTVEVSGKLFSLDVGATGGKKKEAAPAPEPKVETTP EAPKQAPAPPKEAPKKEAPPSTKEAPKPAQPPVSFS  
ERATEFRVAMTRMRKRIAERLKASQTTAATLTTFN EIDMHTIMAMRRTKYKDEFEKQHGVKLGFM SAFVKAASNALLAA  
PQINAVIDGDDVFRNYVDISVAVSSPTGLVVPVLRNVHEMSFVDIERAIAEYGEKAKKGTAL EMDMAGGTFTVSNNG  
VFGSLLSTPIINQPQSAVMGMHAVNQKPWV  
>Goniomonas\_avonlea@etfB  
MRLLVGVKRVVDYSVKVRVKADKTGVD TNNVKMSMNPFCIEAVEEA VRMKDQKLASEVVAVTIGPTQSQETLRTAM  
AMGADRGVHIKCDQELQPLTVAKLLKAVAEKEK PDMVLLGKQAI DDDANQTGQMLSALLGWSQGSFASKVTATKES  
LEVREIDGGTETLSLKMPAVVTADLRLNEPRYATLPNIMKARKKPVETMSPEDLGVSIDTKLKT VSVAEPPTRQAGA  
MVADVNELVAKIKAAGFA  
>Goniomonas\_avonlea@grpE  
MMKRHLLCATGRVLAASRTAAGSRRAPINAASIWA TRARPALHARSFAEEAAAAA APEQPAEPVEEPVKDEKDARIE  
QLEKETKDLQDKCLRTMAESENMRTRSMKNVDDAKKFALQKFATSLLEVADNLGMALASVPEQDRKQDQKLNAFLE  
GIEGTDRLHLKILSAHGVT RVWPLNEKFDPHKHEALFEMPKTGEAEPGTCGQVVKAGYCLNDRLLRPAQVGVVQEA  
>Goniomonas\_avonlea@prot\_10  
MAEEVETFAFQAEINQLLSLIINTFYSNKEIFLRELISNSSDALDKIRYQSLTDKSVLESQPDFFIHIQPDKTNNTLSITDSGI  
GMTKSDLVNNLGTIAQSGTKAFMEAVSAGADVSMIGQFVGVFYSAYLVAEQVTVTSKHCDDEQYIWESSAGGSFTVR  
RDTQSEQLGRGTRITLTKEDQLEYLEERRL KDLVKKHSEFINYPISLVWEKTT EKEVSDDDPEAEAEKPEGDEPKIEEV  
DEESEKKEKTKKIKEVSHWEMV NKQKPIWTRPPEEVTKEEYTA FYKYSISNDWEDHLAVKHFSVEGQLEFRSVL FVP  
KRAPFDMFKKRNKRIALYVRRVFMNDNCEELCP EYLSFIKIGVDEIDLPLNISRESLQQNKILK VIRKNVVKKCLEMF  
AEIAENAEDYKTYEQFSKNLKLGIHEDTANRAKLA ELLRFHSTKSGEDQTS LKDYVSRMQENQKV IYIYITGESKKAL  
ENAPFLEALRKRNLVLLMVDPIDEY MVQQLKEYDGK KLT SVTKEGLQLDDSEEEKRKEEVKARTEGLCKLIKETLG  
DKVEKVVVSDRIVDPCVLVTGEFGWSANMERIMRA QALRDSASQMYMVSKTMEINPDHAIIR ELVVKADQAKGDK  
TVKDLVLLFETSLLTSGFALDDPNQFAGRLHRMIK LGLSIDEGDDEDDGGDIPPLEEDDATATAGGGMMEEVD  
>Goniomonas\_avonlea@prot\_13  
MQTAREFLKFVDSSPTAFHAVEEVRKVLVSSGFNLLREDEPWDLKNGSSYFTRNQSTIVAF TVGKEYRPGNGFKILAG  
HTDSPHFVKPKSLIKEKSGYNQIGVECYGGGLWHTWFDRLTLA GRAVVQTGPSKFEHKL MHIKRPILRIPSLAIHLD  
REANEAFKFNKEEQRLRPV FATSIKSSLESPA VAEGRHHPA VLA AIAEELGCKPEDV RDFELGVVDCQPAIAGLHNEFI  
LAPRLDNLMSCFVCLNGLIASNTPASLADDVDRMVAF FDDHEEIGSSSAQGAASSLLRHTMSRITATSAGGAARPD IHE  
CAISKSFLVSMDMAHAIHPCYSGKHEENHAPAIHKGMV IKTNQNRQYATNAVTA FALREVARRLDIPLQDFVVRNDTA  
CGSTIGPILAHNCGMRTIDVGPQLSMHSIREQC GIDDVESSTKLVTGFLQMFREIDDSLRVD  
>Goniomonas\_avonlea@prot\_15  
MYVIKRDGRRESVKFDKVTARIERLCYGLDPNFVQPVEVAMKVVS GIYDGVSTSQLDSLAAETAASMTTKHPDYAQL  
AARVAISNLHKNTLKSFGTMMKMLYQYEDPKTGENASLI AKDVWKVIQKNAALLDSTIHYDRDYGYDYFGYK TLEKSY  
LLKLNKGKIVERPQHMLMRVAVGIHG EADK VLETYELLSDRWFTHATPTL FNAGTPK PQLSSCFLLTMKDDSIDGIYDT  
LKQCAKISQSAGGIGLSIHNVRAKGSYIKGTNGTSNGIVPMLRVYNDTARYVDQGGGKRKGSFAIYLEPWHADIDDFLD  
LRKNHGKDEMRARDLFYAMWISDLFMKRVEADA EWSLFCPHECPGLADAYGDDFEKLYEKFESGKARKQVKAQQL  
WFKILESQIETGTPYILYKDACNKKSNQKNLGTIKSSNLCTEII EFTSPDEVAVCNLASIALPKYVEMDDFGNGIKFDHQK  
LYEITKVVTRNLNKIIDVNYYPVKEAENS NRHRPIGIGIQLADTFIHLRMPFDSAE AQQLNKEIFETIYFASMETS MEL  
AIEEGTYETWEGSPISKGIFQFDMWDVKPESNRWDWEDLRKKVIKNGVRNSLL LAPMPTASTSQILGNNECFEPYTSNI  
YSRRVLSGFEFAIVNKHLLRDLVKINMWNEG MKNKLIANGSGVQHIDEIPIQTLKDL YKTSWEIKQKVIIIDMAADRGA YIC  
QSQSMNIFMQDPNFGKLTSMHFYA WKAGLKTGMYYLRTKAAVDAVKFTVDKQALQQT KPTTEKINEKPLDYKEYAV  
KNEELAKAASSFVEMSEEEQKFAA  
>Goniomonas\_avonlea@prot\_17  
LQHWGGIYFELGKGRLSALVACTGATG FVLGSAGMPMDWGNFVLLAGTYLSACA ANGINQWREIHNDLSMERTAN  
RPLPSGRITPNHALTAALVAATSGAGLLAVQINPLCAGLCVLNLGIYTM IYTPMKQTSHLNTWAGAVVGAIPPLMGWA  
AATGSLPPAAPFLAALLFSWQLPHFMALAHMLRSDYLAGGYQMLPSFDTPKTANVILRNSLYLFP IAASFPLLGVCXAS  
ALSMGFVYLAI RFRNSHKDEDAKKVFLFSLMYLP AVMAAMMFHRTSTEEAVHD  
>Goniomonas\_avonlea@prot\_18  
DGTREGAAASATPSYYSFISGSVESFERKIEESQRQLGVDPDRDYVPITYASQTSWGGELLRLVPALLMVGIALLMRSMS  
GGAAGGGRNIFQIGKAKPTIIRPDMNVNTTFKDVAGLDEAKIEIMEFVEFLRAPERFRKLGAKIPK GALLVGPPTGKT L  
MARAVAGEANVFFSISGSDFIEMFVGVGPSRVRDLFQQARQNAPCIIFIDEIDA VGRARGKGGFSGGNDERENTLNQM  
LVEMDGFNPTSGVVLAGTNRADVLDPALLRPRGRFDRQVSIDKPIDKGRFQIFKVHLKLNKLLADDDLEEVARRMSSLTP

GFSGADIANVCNESALVAARRAKEAVDISDFEAATERVIGGMEKKSIMSLERRTVAFHEAGHAIAGWFLHADPLL  
 KVSIVPRGVAALGYNQFLPRELSLYSEPMDDMMCMALGGRVAEELCFDGVVTTGASDDLNRVTKIAVQQVAIYGM  
 NKKVGLLSYQEGYNQFTKPYSEATAALIDSEVRDLNRAERYTKELLTSKREFLDRVGNHLLERETMTHDDVQLLG  
 PRPFPMSPSYAEFVRSQSEWADRAAAAHKELMDTAAKLKAAADDVAASAAKKAADKKPEVQSQDKDESQDKKKE  
 >Goniomonas\_avonlea@prot\_24  
 MTDKRKRKIDLEDDAAQKRRTEPAINFLTGRPYSKHYFDLLATRKNLPVNDFKQGFDIAVNKNQTTVLVGETGSGKTT  
 QMPQFLVEAGYIRDKMMVACTQPRRVAAMSVAKRVAEMDVTLGEEVGYTIRFEDMTSPKTVLKYMTDGMMLREA  
 MTDPLLERYSAVLLDEAHERTVATDVLFLIKEVAKQRPDLRLVMSATLDAGKFQQYFEGAPRVDPVGRMFPVEIFY  
 TQEPERDYLEAAIRTVVQLHLCEPAGDILLFLTGEEIEQACKQIEKECAQAGPEVGPVKCWPLYSSLPQAQQRVFDAA  
 PSPRTPDGPGRKIVVSTNIAETSLTIDGIVYVDPGFSKQKQVYNPRIRVESLLVTAISKASANQRAGRAGRTRPGKCFRL  
 YTSKAFNKELQEQTPEMLRSNLGSSVVLTKKLGIEDLVHFDMDPPAPETLMRALELLNYLGALDDEGEMTEMGAM  
 MAEFPLDPQLAKLLVDSPKYKCSNEILSIAAMLSPNIFMRPKEASRAADEAKQQFAHVDGDHLLSNAYYAWKSNRE  
 DQKWAYDNFLNHRSLKSGDSVRTQLSRIMVRFNLPVSTDFGDRDYINIRKALVSGFFMQVAHLDPGSHYLTAKDNQ  
 PVALHPSCCLDHKPEWVLYHEFVLTTKNFIRTCDDVRGEWLEAAEHYDLRNFAPGRKTALERLVRVGTGAPPL  
 >Goniomonas\_avonlea@prot\_32  
 HAVLRVSPKAVRFMSSEDKTVLFDTHVKHGGKMPFCGWSMPLQYDSQGIMASVQHVRSKCGLFDVSHMGQLRFT  
 GKDRVRFIESLVVGDVAGLDVDGARLSLITNENGGIKDDTIITRREDHLYVVVNAAGCFDKDMAHFAEHLERFKKNGGD  
 CTIEVLNNERALYAVQGPATQNLQRHVKEDELSKMAFMTGHWKVVAGHDCIVTRCGYTGEDGFEISMPAGKAAELT  
 EIFLNEPEVEPAGLGARDSLRLAAGLCLYGNLDNEDTSPVEGALMWTISKRRREEANFLGAETILRQIKEGVARKRVGL  
 LVDGAPARDHADVDFMAGNKIGEVTSGAYSPLMKAPIAMAYVSTPNSKLTTEVQVSVRGKLGKATVTKMPFYPYNY  
 TPA  
 >Goniomonas\_avonlea@prot\_34  
 RSGVFMRGVSARLVSTLQHQKLTVTTHKSSLPKLEDLKFQTSDHMLECPWNVKSQWAAAPKISPLHPLQLHPASTS  
 LHYGVQCFEQKAYKDKQGRARLFRPDMNARLQSRGLRCLPDFDKNELLECVELVRVERKWIPDVGDFSLYLRP  
 TYIGNTPALGVGPGSEALLYVICSPVGYPTGFNPIKLAETRYVRAYPGGTGDCKVGGNYGPTVMPQVEAQKKGYQ  
 QVWLFGDEKLVTEVGTMTNQFFIKNKQGE  
 >Goniomonas\_avonlea@prot\_35  
 NSSHYLRRSEHGGRRTTSGSSESSDKGKGPLGWRSLLLIVPIGAGCLAYAEYLKHQQEQRQEQTKVLPSVGRPSLGGD  
 WILDKNHKIVTSDLLRGWLLMYFGFTFCPDICPNELAKITDAINLLDKRLGGPLVTPVFISIDPERDTPQVGEYIKDW  
 HPRFVALTGSTAQVSEVCKFRVYVYKAPTGDAPTDYLDVHSIITYLMNPQGSFVDFGKNKSAPEIVDDIVKYVQQY  
 GAQEK  
 >Goniomonas\_avonlea@prot\_4  
 MNLEKVRNIGISAHIDSGKTTLSERILFYSGRHIEDVRGGGDGATMDHMELEKERGITITSAATSVTHNGYHINLIDTP  
 GHVDFTVEVERSLRVLGDGAVLVLCVGGVQSQSVITVDRQMKRYQIPRLAFINKMDRTGANPRRVVEQLREKLGADAF  
 AQPIGAENFRGVVVDLIEMVAYTFEGDQGEKVVTEGIPADLDEAEARVAMLDLSNYSDEVMELLSEEVSKDMI  
 YRVMREAVLNGATPVYMGSAKNGKGVQPLLNAVYQYLPSPDLREIYGRDPSDEEKIELSPDPDKPFVGMFAFKIVEDP  
 FGQLTFMRYIQTIKKGEAYTNQRSQKRFSRIVRMHSEKREIDEAGPDHIAVMGIDCASGDYTCSEYDYLATLESM  
 YVPEPVKIAVNPRLGDDGDKMSKALQRFKEDPTFSVYDEETNEILISGMGELHLEIYIERIRREYGEVEVYATLESY  
 RESPTREVEFNKHKKQTTGGSGQYAHIVGKLIPIESESEDSFEFEKVVGGRIKQYIPAVEKGRDILGKPIADYVVG  
 TRIELLDGSHYHDVDSSEKAFYTAAGQCFREYFKQAAPKLEPIMKVEIEVPEDFQGTVTGDVIRRRGLMSTNDTNEGMT  
 VILAEPALAEFTGYATDLRSMTOGQGTFTMELAAAYRQTPSNIQEEIIAERKKDELAR  
 >Goniomonas\_avonlea@prot\_5  
 MADGSTFLFSSESVEGHPDKMCDVISDSVLDACLAQDPDSKVACETCTKTGMVMVFGEITTKAVLDYQAIVREAVKG  
 IGFDDSNKGFYKTCNVLVAVEQQSPDIAQAVHVDKKEEDIGAGDQGLMFGYATDETPELHPLSHLLATKLARRLSEA  
 RNDKTLPLWRPDGKTQVTVEYKLEGGACVPQRVHTILISTQHAEVGNVIREKLSKSEIDKVVDAKLLDDKTIYHLNP  
 SGRFVGGPQDAGLTGRKIIVDTYGGWGAHGGGAFSGKDPKVDRAAAYAARVWAKSIVAAGLARRCLVQYAYAI  
 VARPLSVNNTYGSQTKPDAEILAMVEKTFDLRPGCLGRQLDLKRIYAKTAAFGHFGRTDKEFTWEQPKAFA  
 >Goniomonas\_avonlea@prot\_9  
 MVPARPKSYFAEVPMPGADPILGLTDAYNKDTDTKVNLGVGAYRGDDGKPYLPSVRAAEKAIMDANVNHEYAGIT  
 GIKQFVDCSLEFAYGKNSQALKEGRIAGAQLVSGTGACRVAGEFYRFLGRNTPLYHTNPTWANHIPFKDAGLDVRSF  
 RYYDANTCGLDFKGMDDIKAAPTGSVFLHACAHNPTGVDPTTEQWKEISALMKKCGHVPFLDMAYQGFASGDAE  
 RDAAVRIFVDDGHLIGLAQSYAKNFGLYGERVGLSFGADKTEAQRIESQMKIMIRPMYSNPPVYGARLVAHILND  
 PTLNPQWYAEK  
 >Goniomonas\_avonlea@HslVU  
 LKPREVVAELDRHIVGQQAACKAVANALRNRWRMIDSPLEEMPKNILMIGPTGVGKTEVARRLAKLANAPFIK  
 VEATKYTEVGFHGKDVDSIVRDLVETAISMVKAIVRERSKAKVLEAVEERILDGLVGAKAGSSLDRESFRYLXXXXX  
 XXXXXXXXXXXXXXXXXXXXXXXXXXXXXXXXXXXXXXXXXXXXXXXXXXXXXXXXXXXXXXXXVKECRPILEDDEISKLYNQDQIHKMA  
 VDSVERDGIWFIDEIDKIARSKTVYQGADASAEGVQRDLLPIEG  
 >Goniomonas\_avonlea@mHsp60  
 MQRLASFAFRSAVRARPALVSSRIFRGLATGKDIRFGVDARALLQGVDRDLADAVQVTLGPKGRNVVIEQSFSGPKIT  
 KDGVTVAKSIEFKDPHLNMGAQLVRSVASKTNDVAGDGTATVLTTRAFREGCKSVAAGMNPTDLRKGIDLAMRAV  
 VKDLQARAKNISSKEEIAQVATISANGETGIGQLISEAMEKVGKEGVITVQDGKTLDDLEVEVEGMKFDGRYISPYFISN  
 PKNQKCEFEDAMVLLCEKVVSSFSIFPILEHCAKVGKPLVVAIEDVESEALALIVNKLRRGLKVAVKAPGFGDNRK  
 ANMQDMAVLTGGTVIDEDLGLKMESVEPSMLGQVKKATISKDDTILLDGGQSKAAIEERCQHIRSIEATTSEYEREKLG  
 ERLAKLSGGIAVIKVGGAEEVEVEGKDRDLTALNATRAAVEEIVPGGGTALLYASMVR  
 >Goniomonas\_avonlea@mHsp70  
 AATGRAAGRKVAGSLRRARKFTPVARFHASARRMDGVQGDVIGIDLGTNSCVAVMEGKAPKVIENAEGARTTPSMV  
 AFDKDGNNMLVGMMPAKRQSVTNTNTFYATKRLIGRSFSDETIKADQSNMPYKLVKADNGDAWVARADGQKYSQV  
 GAFILQMKMETAEAYLGRPVKQAVVTPAYFNDSQRQATKDAGKIAGLEVLRINEPTAAALAYGLDKTDGQTIAVYD  
 LGGGTDFVSILEISGGVFEVKSTNGNTHLGGEDFDIRIMQHFVAEFKESGIDLTKDNLAVQRLREAAERAKCELSSTSA  
 TDINLPFITADATGPKHMNYKLRTRAKMEGLVEDLIEKTKQPKSALKDAGISTSQINEVILVGMTRMPRVQEVVKTFLF  
 GRDPSKGVNPDDEVVAMGAALQGGVLRGDVVDKIDLLDVTPLSLGIELTGGVFTRLIPRNTTIPTKSSVFSTAANDQTV  
 SIKVLQGEREMAAANKMLGNFDLVGIPPAPRGMPQIEVTFDIDANGIVNVSADKATGKEQSIQISSGGLEDQINSMI  
 HEAEQHAEDARAKEAAEARNEAETLVYSSERSLNEYRDLRDLKEDIDAIETALTNLRAVLGNDDVEAIREKANELQTA  
 SMRIGEALNKASAGSSSSSEGADDDKSGDKQ

>Goniomonas\_avonlea@mrl3  
MPLALHRTGLIAVKRGM TALWDSWGV RVPLTVLEVRDCQVTVQVKT V GKEMTNAVQV GCDNVSRIQRITRPLVGHFA  
AQQVPAKRKLTEFRLWNKEALLPVGTVLNARHFVPGQYVDVQGT SKGKGYCGVMKRWGFSGGPASHGNSKTHRSA  
GSTGQRKTPGRVFKGKMGAGRMGHETTTVHSLLVFKIDNRHNLVLVKGAVPGPNGSYVRITDAVFKPRRDLPFPTADP  
DPAEEVPGEMFAPRGPDPFAAPP

>Goniomonas\_avonlea@nad10  
MQRIQYFISKVDQLVTWAQRSSLWPMTFGLACCAVEMMHTAASRYDLDRFGIILRASPROQSDVMIVAGTLTNKMAPA  
LRKVYDQMPEPRWVISMAGSCANGGGYYHYSYAVVRGCDRIVPVDIFVPGCPPTAEALLFGILQLQKK

>Goniomonas\_avonlea@nad11  
VVINNDEIQVPDGTLLQACEKLNIVIPRCFYHTGLSIAGNCRMCLVEVVGSPKLAASCAMPVLNLRVLTDTTAVRKA  
REGIMEFLLANHPLDCPICDQGGECDLQDQAITYGSDHGRYNEYKRAVADKDFGPLIRTSMNRCIHCTRCVRFSSIGN  
AGDLGTIGRGNIEQISXXXXXXXXXXSELGNLVDVCPV GALTSVSYAFSSRPWELRSIESIDVFDGVCNKIRFDTRGVAILR  
VLPRTNNTCDSTWITDKTRFSFDGLKVQRLTKPLLRSRFTFXXXXXXXXXXXXXXXXXXXXXXXXXXXXXXXXXX  
NLDVANCFVFIGVNRVEANLINLYLRRKLLAVGKSLKISISSFFDPTFFVDYAGHSTRSLEFIEGRHILCRSFFFLSIFII  
GQSVWSRDPGSEEKYFAGTISESDRFVNSRLCYLSASAGQVGSCLGL

>Goniomonas\_avonlea@nad7  
MNQNVLSLVDLVENTSVQFNLTRLREIKNLSLNFQPHPAAHGVLRLILELSGEVVEKADPHIGLLHRGTEKLIETYKY  
LQALPYFDRLDYVSMMSSEHAFSLAVERLSNVCVPIRAKYRVLVFEITRILNHLLAITCHALDVGALTPLLWGFEEK  
LMEFYERVSGARMHAAFIRPGGVAADLPLGLCDDIYSFCVQFSSRIDEMEEMLTNNRIWKQRLVDVGIPTPEEASAWG  
LTGVLLRSGSISWDLRKTQPYEYVSSDFNIPVSSGDCYDRYLIRVEEMRESLRIIQQCLNLLPPGAILTDGKVAPPSRR  
KLKSSMEGLIHQFKLFSEGFILQSGETYTAVEAPKGEFVFLVSDNTNRPYRCKIRAPGVCHLQAVDFM SKGHLLADV  
TVIGTLDIVFGEIDR

>Goniomonas\_avonlea@nad8  
MNIKSFLLIELCRGMWALQYFFRKKVTLNYPLEKGPLSPFRGEHVLRRYPTGEERCIACKLCEAICPAQAITIEAEMRE  
DSSRRITRYDIDMTKCIFCGFCQEACPVDIAIVEGPNFEFATETHEELLYNKEKLLSNGDRWEREQASL

>Goniomonas\_avonlea@ndufv1  
MLAVGARTRAFRLARPLTALVSSRSQKTSFGNLSQDRIFTNIEYGEHDRVKGSMKRGDWYRTKDLIGKGDWDMID  
EFKKSGLRGRGGAGFPTGLKYSFMPKKS DGRPSYLVINADESEPGACKDREIMRNDPQKIEGCLVVGFSMRKAAAYY  
IRGEFADEAITLNQAI AEAYKEGLIGKNACGTGYDFDVYVHRGAGAYICGEETGLIESLEGGKQKPRKPPFPANVGLY  
GCPTVTNVTETVA VCPTILRRGSAFFAGLGRKNNSGTKLYNIIGCVNNPTTVEEEMSIPLRELIERHGGGVTTGGWDLNLLC  
VIPGGVSVVVPASLNCDAIMDYDGLKEYASGLGTASVIVFDKSCDIHGIARIAQFFKHESCGQCTPCREGCSWMSIM  
MRMVEGNADIAEINMLDSISRQIEGHTICALGDAAWPVQGLIRHYRPELEERINAYKARAASAGPH

>Goniomonas\_avonlea@ndufv2  
LSSQVFSHKDSSHNHISTVFEFTPENYKLIKWHMSKYPPAYKRSVIPMLHIAQE QNDGWIPLAAMNKIARILEINPMRV  
YEVATFYTMFRREPIGKNHVQVCTTTPCMIRGAYDILKVVQDYTGCKVGESSKDGLWHVSEAECLGACVNAPMVQVA  
GEICQDSYFEDLTPETIKMLDITKSGKPTVGPQNGRVGCGIQGKTC LHGEPPGPAFFRTD GAL

>Goniomonas\_avonlea@nsf1  
MDPRVLDAMMPLYTWQFNGPHSRSHLYGWETEALVENARASV GKLIGADAKEIIFTSGATESNNLAKGIAHFYGGK  
KKHLITTQTEHKCVLDSRQLQAE GFVTYLPVLKDGLVDMNVLRAIREDTALVSIMAVHNEIGVIQPLAEIGKLCRE  
KKVFFHTDGAQAAGKIDIDVNEMNIDLLSISGHKLYGPKGIGALYVRRRPRVLEAIISSGGQERGLRSGTLPAPLVVG  
MGRAAEVCLQEKENDLAHIKRLADRLYDGITASVDHVFNLNGHRHQRYPGNLSFAYVEGESLLMALKEIIVSSGSAC  
TSASLEPSYVLRALDVGEDLAHSSIRFGLGRFTTE

>Goniomonas\_avonlea@odpA  
SRVAPLRVVAPRLLHNFVVDGENLTADLPPIKTHLV DGVPTSTKTNKTELLEYRITLLMRRVEIVSDLLYKSQVIRGFC  
HLYDQGEAICVGMEEAITKDDSIITAYRDHCTQIGRGDTAERVLAELCGRFTGCSKGGGSMHMYLRSANFFGGNGIV  
GAQIPVGTGLAF AHKYNNTNGNSTPGSPSSQVAISMFGDGASNQQLFEAMNMAQLWKLPIIYVLENNQYGMGT SKG  
RAASNPDFYQRYDNIPGIKTDGMDVHAVR

>Goniomonas\_avonlea@odpB  
MALFRRGLAVTKACRVVSRHFGSSRVLASPOLTVRDALNAALDEELERDPKVFLMGEEV GAYQGAYKVSRLGFQKY  
GAGRVDTPISEAGFAGIGVGAAMQGLRPVIEFMTFNFLSLQ AIDHVINSAKALYMSAGQINVPVIFRGPNGCASGVGA  
QHSQCLASWYAHCPGLHVIAPYDAEDAKGLLKASIRDNDPVPVLENELMYGANFVDSAAVMEKDFVLPIGQAKIMRP  
GTNVTIVTFSRMVAHALQAAEELEAQGISAEVINLRTIRPLDMKTIAESVKKTNHIVTVEEGWPAYGIGSEIAACIMESEV  
FDMLDAPLERVTGVDVMPYAKNIETAAQLAPHNIVNACKRVCYRNK

>Goniomonas\_avonlea@PCCB  
MHRLRTSPLLRASLLRRPALRSPPLQNAVASFATVGRSFDQKLAVLEERAIEGGAKRIEKQHKGGKLTARERIEVLLDP  
GSFREYDKLVEHRCVDFGMQKNKTPGDAVVTGTGTINGRQVYLFSDQFTVFGGSLGEMHASKICKIMDRAVAAGVPV  
IGLNDSSGARIQEGVDSL AGYADVFLRNVMSGGVVPQLSVIMGPCAGGAVYSPAITDFIFMVEDTSHLFITGPNVVKTV  
THEDVTFEALGGAKHTHTKSGVAHRSFRDDAEALLQLRALYDFLPLSNRDAAPVRQSHDPRTRQEAASLDWIVPHDPNT  
PYDMHHVISKVVDGDELFEIMPDYAKNILVGF SRLEGRTVGIVANQPKELAGCLDIDASVKAARFVRFCD SFNIPVTFV  
DVPGLPGTAQEHGGIIRHGAKLLYAYAEATVPKLTVITRKAYGGAYDVMSKHLRGDVNVAWPSEIAVMGAKGAV  
EIIFRGQSAEEEVKYLDFATPLVAAQRGFIDAVIQPHETRTFLCV

>Goniomonas\_avonlea@sdh1  
LVRAAKFHRSAPAAASQDHVHSYPVVDHYSYDAIIVGAGGAGLRAAVGFAENGFNTACITKLPTRSHTVAAQGGINAAL  
GNMSEDDWRWHFYDTVKGSDWLDGQDAIEYMCREAPRAVIELEHYGMPFSRTEEGKIYQRAFGGQSLHYKGGQAH  
RCACVADR TGHSMLHTLYGQALKNDAKFFVEYFALDLIMDEGACRGMALCMEDGTLHRFRAHNTVLA TGGYGR  
AYFSA TSAHTCTGDGNAMAARAGVPLQDHEFVQFHPTGIYAGCLITEGARGE GILRNKNGERFMERYAATAKDLA  
SRDVSRSMTIEIREGRGVGPEADHCYLRHLDHLPALLAERLPGISETAMIFAGVDVTKPEIPVPTVHYNMGGIPTLKT  
GECVTIGPDGKDRIPGLMAAGEAACASVHGANRLGANSLLDIVVFGRAQAQTVA AKSKPGMPLPDLPKNAG

>Goniomonas\_avonlea@sdh2  
MVAARDMTSVQPKPKMKRFDIYRWNPVEEAKAHLQTYEVDLND CGPMILDALIKIKNEQDPTLTFRRSCREGICGSCA  
MNIDGNTLACLASISSEKTPYIPLPHMYVVKDLVTDLTNFY AQYKSIKPKWLKSEAKGDKHEFMSAENRKTLDGLYE  
CILCACCTSPSYWNNPEKYLGPVLMQAYRWIISRDEATEERLES LGPPFKVYRCHTIMNCTQTCPKGLNPGKAI  
QLK

>Goniomonas\_avonlea@SUCLG1

MLRTRLQTVRAGRRFASTIPRLKNGTPAPTIVSKATKVLCOGFTGKQGFHSTHAIEYGTNMVGGVSPGKGGSTHLNL  
 PVFNSVQEAKAQVQPDASVIYVPPGAAAIALEALEAEIPLVVCITEGIPQQDMVRVKAALNSQATRLIGPNCPIGKPG  
 ECKIGIMPYIHKQKIGIVSRSGTLTYEAVYQTTVAGLQQTTCVIGGGDPFNGTFLDCLEYFVSDPETEGIIMIGEIGGT  
 AEEQAAEWLGS CGNKKPVVGFIAGLTAPPGRMRMHAGAHISGGKGTATAKIEAMNKAGITVSSSPAKLGSTMLVEMKA  
 AGLA

>Goniomonas\_avonlea@tufA

FIGRCVSPAGLTSESRASLAPLVVKARHMAEYKRDKPHMNIQTIGHVDHGKTSLTAATIKILAETGGAEFRAVDQIDNA  
 PEEKARGITISSAHVEYETATRHYAHVDCPGHADYVKNMITGAAQMEGAILVVSAPDGPMPQTRHILLARQIGVPSIV  
 VFLNKCDLVDDSELELLEVEVEVLEFVKFPGGDLPIVGRSALCALENTKPELGRDAIIEIMKQVDAVYVPLPERDLK  
 PFLMPVEDVFSIAGRGTVATGRVEQGGIKTGEEVEIVGIQATVKTVTGLEMFMHKLMPISQAGDNVGCLLRGQKRNDV  
 MRGQVLCCKPGTVKPHKKFKAELYVLTKEDEGRHPTFMTNYPKQFFRRTADVTGTVTELEDAQAQMVIPGDNVSVCTVELL  
 YPLAINQGLRFAIREGGKTVGAGVVAIDE

>Goniomonas\_avonlea@TypA

VASLRNVAIVAHVDHGKTTLVDKLLAQCGEGGGDRVMSMDLEQERGVITIRSKVTAWEVKDHRMNVVDTPGHAD  
 FGGEVERVLGLVDGFLLLVDAVEGPMTQTKFVLGKALQRGLQPIVVINKVDRDQSRISQVMNDVDFLDFVNLDATEEQ  
 DFPFMYASAKEGWAIAGLGGDISVGMAPLLDAIVS

>Goniomonas\_avonlea@ndufa9

MSSVGLTASMERARAGMGGRSSVSGVVATVFGAYGFLGKYVVRNLGRTGTQIVAPYRGDIYEARDKVLGDLGQIVL  
 VHYDANNREEIMRTMEHSNVVINTGKRKETYFSTFDSANHQLSKTIAECATEVGCIERFIHVSSLSAVEGAQSKWSQS  
 KLAGENA VREAFPSATVLRGLPLVGEEDKFMNRFVAVMAKTLNRVPLFGRQDAKFQPIVGDVSRASISNTVFNPRTRGK  
 DYDLAAPESFTLREIVDFVIETMRHPEAKVLPVPLGGIQGNRIEKSPIPRFALTEDEVTEYQEDHVCPRGSKGARDLV  
 PVLLS SDSVGFRLFSQC

>Goniomonas\_avonlea@ndufaf5

MHKIACHASGNTVTQDIFDRQVKRIQRDAAALQPDANFDYLRNEVASRLVDRLLDDTIVKFPPTALDLGCGPGCIRKHL  
 SDRGGVRLLYQCDMSPQMVHRARNLVVTDVPTPPSVSLVADEEDLPRDESFDLVMSNLSLHWVNDLPGVLTVKVRKC  
 LKPDGMFLGAMLGGSTLTELRTALILADQDLGGVA AHISPMVGVADAGNLLGTAGFSLISVDVDTIKVEYKDAYELM  
 HHLQAMGEGNAIKRRKQFVSKKVFDLAAKKYKGLFGTSKGV EATFQV

>Goniomonas\_avonlea@NifU

MPRVSVLAAHRRSMFIQTQDTPNENCLKFLPGETVLEEGMTNFQDMRSAMISPLAKALFRVDGITGVFFGKDFISVTKS  
 AKIDWDLKPDIFSVIMDHYISGQPVLLDESDAQHEDTRILPGDSEIVATIKELLDTRIRPFVQEDGGDIRYISFEDGIVKV  
 QLQGACSTCSSSTITLKNVENMLMHYVPEVDAVEAIETPDEHLEGQVAEDQLKFVAVSTTNPDGSRRD

>Goniomonas\_avonlea@PCCA\_

QPPFKKILVANRGEIACRVMKTAKRLGIKTVAVYSEADAQALHVRLADEAVCVGPAPSAQSYLNAKNIMDAMRSTGA  
 EALHPGYGFFSENTEFAKQLEQEGFVFIGXXXXLAAAMGDKIESKLLAAAAGVNVIPGFNDIIRDDAHAIEIARQIGYVP  
 MIKASAGGGGKGMRYAVYNDDEAKEGFRSTNEASASFNDDRIFIEKFIENPRHIEIQIADKHGNVAVYLNRECESIQRN  
 QKVIEEAPSVLLDEATRAAMGKQAVALAHAVDSCSAGTVEMIVDQKNFYFLEMNTRLQVEHPVTEYITG

>Goniomonas\_avonlea@UQCRC1

AMSSSQSFCAPLPPNYKFDPAKYRTVPTVTTMPNGMRVASETTPGETATVGVFIDAGSRYESDITNGTAHFLEHMNF  
 KGTQKRTQQLETEIENMGHNLNAYSREQTVYAKVLKQDVPKAVDILSDILLNSELKPANIERERGVILRELDEVC  
 SEEVYVDDLHGTAYQTTALGRITLGPVENIQSIKREHLVDFIKANYTAPRMCLVAGAVDHDQQLVELAEKGFQGLRTE  
 PEVAPAEAPHQSIFVSDTRYRNDMEKAHV ALAFEGVWSSGDSFAQMVMQALLGNWDMHHFSGKNMAMSPMCSTI  
 AERGLATNITFTQYSDTSLFGVYIGCDPDTISDMCVIMREAAANLAHRSTDEVDVARAVAKLKNLLFDLQDGTSGQICE  
 DIGRQLQTYRRRLSVAEIFARLDAVDAPTVRVASELISDRDIAVAARGPLANMPDYGWLRRRTYMLRY

>Goniomonas\_avonlea@UQCRC1

AEPLVRTTGSLSNDYEFEHDDKIADGDPKRAYTYFVLGGARFVFAFGRLAVLKLHSMNASADVLALASTEVDISGI  
 AEGTMLTLKWRGKPVFIKHRTASEIKAAEDQNPALRHPQSDSERVQKPSHLIVLVGCTHLGCVPLGNQGDFAAGFFCP  
 CHGSHYDTSGRIRKGPAPLNLLEPPYKFIEEQKVFIG

>Malawimonas\_californiana@atp1

MFASALRSKVLATSVRQLSTSSALAAAPTASEVTRILEDRLKTFAKSEVEEVGKVLVSGDGIARVHGLLNVQAGEMVS  
 FGNNIKGMALNLERDNVGVIFGNDRRAIREGDMVKRTGAIVDVPVKGGLLGRVVDALGNAIDGKGPLDAAHRARVEV  
 KAPGIIIPRYKVHEPMQTGLKAIDSMVVPVGRGQRELIIGDRQTGKTAVVAIDTIINQKFINDDSTDEKLLYCIYVAVGQKRS  
 TVAQVVHTLEKHGAMKYTTVVAATASEAAPLQLFAPYTGCAIGEYFRDNGMHALIIYDLSKQAVAYRQMSLLRRP  
 PGREAYPGDVFYLSRLLERA AKMSEAKGFGSLTALPVIETQAGDVSAIYPTNVISITDQIYLESELFYKGVRAINVL  
 SVSRVGSAAQEKAMKQVGGHLKFLAQYREVAFAQFGSDLDASTQHQLNRGARLTEMKLGQGYQPLPMEEQVAVI  
 FGGVNGFLDKLPVSEVQPFEGFLRKYIKEQADVLEQIKKERKLSDATTLNKNVYEGALAA

>Malawimonas\_californiana@atp2

RAQGVRFASLTNRAPVLRQSAAVQVRVQQRGYAEKPAATGAAKGKIVQVIGAVVDVQFDTHLPQILNALEVQNHEL  
 VVLEVAQHLGENTVRTISMEGTEGLVRGQGVVDTGLPITVPVGRECLGRIMNVIGEPIDDRGLPTTKRPLPIHTEPPTFTE  
 QGGAAEILVTGIKVVDDLAPYSKGGKIGLFGGAGVGKTVVIMELINNIKAHGGFSVFGVGVGERTREGNDLYKEMIESG  
 VIKLGGESKAALVYQMNPEPPGARARVALTALVAEYFRDEEGQDVLIDNIFRFTQAGSEVSALLGRIPSAVGYQPT  
 LATDMGAMQERITSTKKSITSVQAVYVPADDLTDPAPATTFSHLDATTVLSRQIAELGIYPVAVDPLDSTSRILDPVIVGE  
 EHYNVARAVQKLLQNYKSLQDIIAILGMDLSEEDRLIVARARKIQRFSLQPFHVAEFTSSPGKFVPLKETIAGFKALE  
 QYDYLPPEGAFMVGNVVEAVERGKQMAAELAKKDK

>Malawimonas\_californiana@atp3

MATLKEVNNRIKSVKNISKITKSMKMVA AAKLRRQAALMAQAQNYVEGIKRFMEKEVATAEKSEAVPAAKTAEKQK  
 HLILAITDRGLCGGVNSTVARNVRLVKAEDAAGRDTEIMIVGEKQATLRRDMSKRISYVFLLESKQPLTFGAAAAI  
 AERVA AAKADQLTIVFNFKSIAFETVRRPLLSYKALEESKIESGAFEFDTSLPSLYEFQLANTIFSALVENTTVELSSR  
 TMAMDNASRANQMIDRLQLFYNRSRQAVITKELIEIISGAAV

>Malawimonas\_californiana@cox11

RWENREIGLAVGAIITGVAASYVAVPLYQMFCQATGYFGAPSTQAVRKAFFEESEEDQKLVKRPITVRFSDV ASGIPW  
 HFEPAREIVVIPGEPALAFYRATNHSKPIIGVSTYNTVPAALARHFVKIQCFCEHQRLAPHETVDLPVFFYLDTQML  
 KDPFLNRVRSVLSYTFFLTEDQQSEDEVMEQAERARD

>Malawimonas\_californiana@cytc1

CLRASKARASLATVAERVEEPSKRLVTLGLALVGA AVSAAALLVPRDTHASSDLSLPAEYPWAHKGILSSFDHAAIR  
 RGFHVYKSVCANCHSVELIAFRNLVDVAFTEPEVKIAAAGYEVQDGPDEEGSMFERPGRSLSDKIPKYPNEEAARFGNN



GALPPDL SLIVKARPHGADYIFALLTGYRDPAGV VVRPGSFY NPYFAGGVIGMPPPLGEGAXXXXXXXXXXPTPAQAAK  
DVTEFLAWAAEPEHDDRKMGMKVFLTLGVA AVLAMWAKRFKWNVVKHRTIQFMDMSRGP GMR

>Malawimonas\_californiana@DLDH

MLRLLARPVSLTSSVLRPAAVTTARGYAAPASDADVVVIGGGPGGYVAAIKAAQLGLKVACVEKRGALGGTCLNV  
GCIPSKALLQTSHL YEEIAHDVKGHGKIVQGVSDIAAMQVEKEKRVKGLTTGVAGLFKKNVAYHQGFGRITSANEV  
TVDLNEGQAKINAKKIVITGSDVAPLPGVAIDKVVVSSGTALALSKVPKRMVVVGGGVIGLELGSVWRRLGSEVI  
VVEFLDRVGGPMDAEIAKQFQILGKQGMKFKLGTGVGAEVRGDGATLVLEPAKGGAEKLAADVLLVLSIGRRPFT  
DKLVLAEVGVSMDKRGFVNINDNFQTNVPSIY AIGDVVRGPMALHKAEDEGIAVAEILAGKHGHNVYGVIPSVIYTYPE  
VAWVGKSEELQKENIKYKVGKPFPIANSRAKTV AQTEGLVKFIADAETDRVLGCHIIGSNAGEAIAEPALAMEYGASS  
EDIARTCHAHPTLAEAIKEAAMATYDKPIHI

>Malawimonas\_californiana@DLST

MFRVGLFGRVGSVAVRIARPQVREVAKVFNLP TIADSI SDGT V GKWHFQPGDAVKTD DDLISTVETDKVAYEFRSPVN  
GVLLKHFPKDGNIKVGEPFVEIDVDAAGGKSKSDDAPKEETPKAESKKEASPKPEQPKPEAPKAEPKAEVKTAPKEP  
TPAPQPVFTGSRSENVPMRMRQRIARL KDSQNTNAML TTFNEIDMSGYITLREELKDVFAEKHKVKLGFMSGFVK  
AAASALRFMPVVNSAISGTDIVERDYIDISVAVATPTGLVVPVLRNADQLSFAGVEKAI AELGTRARDNKLTLADMAGG  
TFTISNGGVYGSMMGTPIINPPQSAILGMHGTVKRAVVVNDQIVIRPMMYVALTYDHRLLIDGREAVLFLRHIKDCVEDP  
RRLLELV

>Malawimonas\_californiana@etfB

GCTTSCATTMRILVAVKRVVDYAVKVRVRPDKTGVELAGVKMSMNPFD EIAVEEALKLKEKGVATEVVAVSVGPA  
GAAEVLRNALAFGCDRGHIA YEKGEVSTLSVAKLLKGLVAKEQPGLIILGKQAIDDDSNQTGQMLAGLLNYPQGTFFAS  
KVAVSSDKKTV DVTREVDGGLETVSLTMPAVITCDLRLNTPRYPTLPNIMKAKKKPIDKVTPEDLGVTVQSTLKM LTV  
EPAKRKGGVIVDSVETLVSKLRNEAKVI

>Malawimonas\_californiana@grpE

MLRNVLRASLARASMPAPWRLRTPVRLFASETTEPKAEAEAGQQPEPAKDPKTDLEK KLSSEVEKIKELNSNY  
LRAIADAENARKIARQDRVQNAREYGVGEFAKSL LAVADNLDHALASVPPAARADKLMSSFYDGVSM TQTTLMKALE  
KHGVTRIQADLGQKFDPNCHNAVFEQDAPDREAGTISQVIKSGYKIRDRVLRVADVGVARASS

>Malawimonas\_californiana@prot\_10

MSKTETFAFQAEINQLMSLIINTFYSNKEIFLRELISNASDALDKIRYEGLTDKSRLETNPNLEIKIVPDKTNKTLTVWDSG  
VGMTKADMNCLGTIARSGTKAFMEAVSSGADLSLIGQFVGFYSAYLVADRVTVSKHNDDEQYVWESAAGGSFTIT  
PDADGEPLRRGTKIVLHLKEEQLEYLEERRLKDLIKHSFISYPIYLQVEKEKEKEKPKDEDKETEESDEEGEKEDK  
KEDKKPEKEKVKELVLNKKQPIWLRKPDEISREYGTFFYKSLTNDWEDHLAVKHFTVEGGVEFTACLFTRRAPFDM  
FEPKPKPNIRLYVRRV FIMDNCEELIPEYLSFIKGVVDSDELPLNISRETLQNKV LKVIKRNIVKCKLEMFTELAANKD  
DYKKFYDAFSKNLGIHEDATNRAKLADLLRYHSTKSTEDQTLADYQTRMKENQEFIYITGESRAAVESSPFLEVF  
KKGIEVLLMTDPIDEYAVQQLEKYNKKLVNITKDGLKLPETEEKKKFFEEKAAAEGLCKAVKEILGDKVDKVQVG  
TRITDPCVLVTSEHGWSANMERIMKAQALRDSMSTYMTSKKTMENPAHPMAELRRRVEADKGDKTVKDLVWLL  
FETSLLTSGFSLDEPTGFASRIHRMIKLGLSIDEDEMTDAAPADLPSLEPSETKTTSMEEVD

>Malawimonas\_californiana@prot\_11

MATVKHKVLILSGKGGV GKSTVSSQLAYAFAAKEMEVLGDDIDICGPSIPKMMGLEGESVHASNLGWEPAYVQENLA  
VMSIGFMLQDPDQAIWRGPRKNGMIKQFLKDV CWGELDVLLVDTPPGTSDEHLSVVQFLKESGIDGAVIVTTPQEV AL  
LDVRKEITFCQKVGVPILGVVENMAGFVCPNCKTETQIFYPSSGGAARMAAEMGV PFLGSIPLDPRLRGAAD EGGKSFAS  
VHGDSPAVKTLNVIVDQLARTLDC

>Malawimonas\_californiana@prot\_13

MASHATDFIKFVNAVSPYHAVHQARSLLAAGYRFISEAGTWDVKPGGKYFYTRNQSTIVAF AIGQQYTAGNGFNIV  
AAHTDSPVLKVKPVSVHSSAGYVQGVPEPYGGGLWHTWFDRLTVAGRIVVRGGADFSSRLVRINKPILRIPTLAIHLN  
REVNSDGFKFNTQTHVLPV LSTAVKEALAVPSDAKHHPRLLEMLAKELSCPKEDIHDFDLNLDVTPQSVIGGPLDEFIFS  
PRLDNLCMSFCALMAGDLSSSENVRMLALFDHEEVGSASDHGAASPIAEVVRVVTLLGGTSMPTDLVEVALR  
KSFLVSADMAHAVHPNYSEKHESHHPAMHKGIVIKENSQRYATSSITSLPLRIIAQKRSIPLQEFVVRNDSACGSTIGP  
IISSNAGMRAVDIGAPQLSMHSIREMCGVEDVKWGVQLCQAFYEEFSEVDRHVRVDDQTA

>Malawimonas\_californiana@prot\_14

MYRNVLEEMFEKWEANPQSV DSSWQTFRRDVQASESFESFKSTVAAKGS DPESIKRAVYD TVRLM TLARMYRVRGHL  
NANLDPLGLQQPVLADLDP AKYK LSEADMKREFVSPPLGQISDYDKYRVVAPSRVVEDIRRVYCNTVGV EYHIIHD  
AVQREWLQNKIEVEHPKELSKDEKLWIYTHLAHAELFEQYLARKEKTAKRFLGEGGETCLPVLEKIVEAASDQGVESIV  
IGMPHRGRNLVNLANTM KKPFAIFQGFHKL SVDEWDKIHNQQEELVGSADVQSGSDVKYHLGTTVDRLLNXXXXHL  
TLPSPNHL EAVNPVEGRTRAQQFYLG DTERSRAMSVLMHGDAFAAGQGVVAETL MFSDLPTTGGTIIHVNQIG  
FTTDPVSGRSTPYCTDIAKGAGAPIFHVNGDDPEAAVRIAQLAVAEWRQRFHKSIVVDVVCYRRRHGNEDEPSTQPR  
MYKAI EAKETVKVSYGKLVASGVVTA AELEAMDKSFSEMLEQEFQAGKDYVHNPLDWIPKPKELAQLPVQPTG  
VEESTLLAIGKHVTTVPEGFTVHPQLKRSVIAARAKMMETKQGLDWGMGEHLAYGSLLEGHAVRLSGQDVERGTF S  
HRHAVWNDYESPVKSSKIPLDNMSKDQGRFIANSLSSEFVGLGFEYGTSLSPAHLAMWEAQFGDFANGAQVIFDQ  
FLSSGEQKWYTSGLV VLLPHGYDGAGPEHSSCLERFLNMSSEEPETPRAEWDEELQLRQCWNQVVYLTTPANYFH  
AIRRQMKRNYRKPLIVAVSKGLR LPASNLSDFLPGTFMSVYPEQNPQDLVDPKDVKRIVFVSGQLFYDLIKARSERKI  
KDIAIVRVEQLNPFPAAVAREADKYPNAQVVWAQEPEKNMGSWGFVRPRLELILNYDRDPIYVGRHVSASPATGWA  
QMHEKEKEALKRAAMTIA

>Malawimonas\_californiana@prot\_18

GMNLPAGVEAHGPQRKIVFRIGSVTSFEKLLDDAQNEFGIPPSQRVPVSFVQATSLVNEALRLLPTLLL VAGFLYMMRK  
MGGSSGFKLFSVGKSPAQVFKQGDIKTTFKDVAGLGEAKNEIMEFVEFLRNPQKFSRLGAKIPRGALLVGPPTGKTL  
LGKAVAGEANVPFFSISGDFVEMFVGVGPRSRVDFLFAQARSNAPCIVFIDEIDAIGRHRGKMGGNDERENTLNQLLV  
EMDGLKSLAGVIVLAGTNRADVLDPALTRAGRDFRHFVDPDLPARQKIFEVHLKPLKLDADPPPEAYSKRLAGLTPGMS  
GAEIANVCNEAALHAARTSKKAVEFSDFQYAVDRVIAGLERKSRVLTPTTEKRTVA YHEAGHAVVGVWFLEHCDPVLKM  
MDMVCMTLGGRVAEQIFFAKASTGAADDLDRITRSLY AQJAMFGMDKEFGPITYPAPKDGELQLWKPYSEETAVIDE  
RVRTIVREAYDRTLRLTEKKDAVVKLAEALLEKEMLSQEDVITLIGTRPHGAMSNEYAFVYGEKGYKGSLEEAQQRD  
AATRPREGSIGSTV

>Malawimonas\_californiana@prot\_24

MTERKRTFGQATEQMNPLTGRTFQSRYFDILAKRKTLPVYEF RDEFIDIVNKNQVVVLVGETGSGKTTQIPQFLIDMGF  
ANTKKKVCCTQPRRVAAMSVSKRVAEELDVLGEEVGY SIRFEDMTSQKTILKYLTDGMLLREAMTDPMLEGYSCIVL  
DEAHERTLATDVLLGLVKEVSRKRKDLKIVVMSATLDAEFKQTYFDGAPLLKVPGR LFPVEIFYTPEPERDYLEAIRT

VIQHIMVEKPGDILLFLTGEEIEEDACKRIVREAGNLGDQVGEIMAVPLYSSLPNLLQKIFDTAPAARRSGGPPGRKVV  
 VSTNIAETSLTIDGIVYVIDPGFAKQKVYNPRIRVESLLVTPISRASAQQRAGRAGRTQPGKCFRLYTEKAFKELIPNTY  
 PEILRNSLNTVLLKLLGIEDLVHFDMDPPAPETLMRALEQLNYLGDALDDGDLNTPMGSTMCEFLPDLPQSKMLVM  
 APEYNCSNEMLSIVALLSVPNIFVRPRESAAAADHAKAQAFLHDGDHLLTLLNAYHAYKANNDDQWQWQNFNARM  
 KSGDNVRTQLARIMRKFNLPLVSTDFNSKEYYPNIRKCLCTGFFMQAAHLERSGHYLVTKDSQVVALHPSACLHDKPE  
 FVIYNEFVLTTKNFIRTVTDVKAEWLLEVAHYDDMDNFPDCEAKLVFKRILQRRAIADKQSSRYASSTY

>Malawimonas\_californiana@prot\_25

TPTVRSFLRNLIRAASQKAPGYVIGLPLSPTMEKGTISEWVKEGDKVSPGDQLAMIETDKAQVPFDSQEEGYIAKIL  
 VPKGSSDIPVNPQIIIAENKEDVAKFKDYVPEGASSSSSTSESAPASAPAPEQPAQQPAQQQASKAAEPAERGRIFASP  
 VAKKLASEQGIALSEIQSGPAPTHRIVKADVEKAASQPKKAAAPAPVFSAAV PATGAYTDVPLSNIRKVIATRLTEAK  
 QTIPHYLTVDVVMDPELLAIRQELNASQAKDSKISVNDVFKASALALRKPVTVNSWVGTAIRVNHTVDVSVAVQAD  
 TGLITPIKXNDQRGVVAEISAATKDLAERARKGGLQPSEYQGGTFTISNLGMFGRQFAAVINPPQACILAVGASSRRVVP  
 ASEQGGDDVKVANVMTVTISADHRVVDGAVAAQWLGAFRGLLEKPVMTLL

>Malawimonas\_californiana@prot\_26

SYHSLKTDGPVLDGAVDTASDAFKANTAVMSEYVAQLRQHVAAAKQGGDDKTRKRHTDRGKMLPRDRVGALLDAG  
 SPFLESLAGHGLYEDSVPAGGIITGIGRVAGTECMIVANDATVKGTYYPITVKKHLRAQTIAMQNLPCVYLVDSDG  
 GAFLPLQSEVFPDKEHFGRIFYNQAMSSMNIPQISVVMGSC TAGGAYVPAMSDETIVKGNGTIFLGGPPLVKAATGE  
 VVSAEDLGGADVHCRTSGVTDHYATSDEHGIALARRIAANLNRAPPQSPPTPEAPAFDPADMGGLIPADTRVQFDVR  
 KVLARIVDGSRFDEFKALYGTTLVTGFAIRIHGHPVIVANNVLFSDSAAKGAHFIELCGQRGIPLLFVNITGFMVGRK  
 YEAEGIKAGHKMVTAVATAPVPKLTIIGGSFAGNYGMCGRAYDRPFLMWPNARISVMGGTQAASVLTAVQREG  
 MERAGKQWPQEQAQFRTAIEDRYNHEGSAFFSSARLWDDGVIEPSSSRDVLGLALATTARAPKPLPHWGVFRM

>Malawimonas\_californiana@prot\_32

RLAAPLARTFATDATPLMKTPLNEFHKKLGAKMVPFCGWEMPVQYKEGVLAEHLHCRSKASIFDVSHMGQLKIFGKD  
 RNAFIESLTVADVNGAAENKAQLSVFTNEKGGIIDDITRNLNHLFVVINAGCRDKDMAHLRAHEAKFRSSGKDVKI  
 EEIDTHALVNLQGPAMNVLQAHVKEDLKQVPMSSHMIRVNGVECRVSRGTYGEDGFEISIPSEQAVSLTESLLNSP  
 VAKVLMTGLGARDSLRLEAGLCLYGHDLNEDITPVEGSLAWTIKRNRSEGGFPADKILQQLSSNVYPIKRVGLTSTA  
 PAREHMEIQDEAGKKVGEVTSVTPVTKASISMGYVPLELSKVGTKLHVMRNGKQIPAVVAALPFVPTRYKTKPKAA  
 APK

>Malawimonas\_californiana@prot\_33

GVSIAAGAVASLSFAISDKTPPIVISQTNAPLPTRADHLKRVRELASFDVIVIGGGATGCGVAFDAATRKLNTLLERD  
 DFASATSSRAKLVHGGVRYLEKAVQELDWEQLRLVDEALNERGVLLRTAPHLVHALPIIVPLEKWWKVPWMWIGCK  
 LYDFISGKAVVGKSYLSQEEITLKRITLAPDRVAGSMVMYEGQMND SRLCTTVALTAAANGATVNLHVEVVGLDKE  
 XXXXXXXXXXXXXXXXXXXXXXXXXXXXXXXXXXXXXXXXXXXXXXXXXXXXXXXXXXXXXXXXXXXXXXXXXXXXXXX  
 XXXXXYLVDVRSVWTGIRPLAVDPHKVGSVTTAQISRDIHVHVS DSGLVTINGGKWTFRMAEDTLNRAVAVANLP  
 AGPCVTRRTMLLGGDGYTSSLHEHLRSEYQLDPSVARHLADNYGDRAVTVAEYIKQGFGRKLAPDYLFVEAEVLHAV  
 RAEYACTVVDVIARRLRLAFLDRKELTNAIPAVAALMAKELRWDDTRRAQEEQAARQFMRFEPADGDACARPS

>Malawimonas\_californiana@prot\_34

RFAAAMASPEPAADIDASRLTITRKTTPRPKQPHESLIFGHTFTDHMLEIDYKPKSGWSAPRIVPLHDLSLHPAASVLHYS  
 LECFDGLKAYRSPQDKPVLFRPDQHMARFNRSARLALPSFNEPQLLECKLVSLE RDWIPNARGYSLYIRPTLIATXX  
 XLGVQPASHALLYIILSPVGPYYREGFKAVKLLAEKEYCRAFPGGTGDAKVGNGYAL SILPALEAAQKGYTQVWLFG  
 PQHQITEVGTMMMFVFWKNEQGERELVTAPLDGTILPGVTRDSVLQLARQWGEFKV SERAFTMPDVVKALEEGRVCD

>Malawimonas\_californiana@prot\_35

MYSKSPITWTGFGIIGITGVGMVLYFNYEKEKQLRNARLGRITIGEIMVGGPFELQDLGDNKVTDAELLGHHSVYVGF  
 HCPEVCPNELAKMGVIMAGLDSDEQTKGQVQPYFVSDPGRDTPPEKLREYAKQWHPHSIRYL TGHDDQIKHVARAYRI  
 YSKPDDDKDYLVDHSIVMYLMSPTGKICIGYFGQTHNAEQVVS KIRELLGPSYTFLEWIGKTVGLSKSDSV

>Malawimonas\_californiana@prot\_37

MLAKYLWLKGETGLKVRVVGALTLIGAKITNVYVPIFKHSDALAAPTDLALAI PFSVLVGYGVARGAASLFNEM  
 RNVVFANVAQNARRVSLQVFEHLHKLDLNFHLSRQTGALSRIIDRGVGRGINFVLSAMLFNIVPTFLEIGLVSALLAHTC  
 GAPFVLVTAAGTVVAYAVFTIIVTQWRKFRKQMNAIENDMSSKVLLESLINYEYVYFGNERMELKRYDQSLAGYEGAS  
 IKTQTSLGFNLQGSIAFTAGMTGLMLLAAGVHGMETVGDVLMVNGLLFQLSIPNLFLGTYREMRQSFIDMEQMF  
 SLLSVPATIQDRPDAKPIVVRGSGSIKFEHVTFGYSKDRPILRDVVSFEVPAGRTVAIVGPSGCGKSTIMRLLFRFYDVSEGA  
 VRIDGQDVRDVTVDSLRRQIGVVPODMVLFNDTVYYNIA YGRPGADPEEVYAAARSARIHVVNSFPDGYNTK VGER  
 GLKISGGEKQVIAIARTMLKRPAILLCE

>Malawimonas\_californiana@prot\_4

MHEIKSEVGSKMDSMELERERGITIQSAATYCGWKGHNHINIIDTPGHVDFTEIEVERSLRVLDGAVMTITVDKQMKRYHV  
 PRVAFINKLDRMGADPFRVIGEIRAKLRHNAAAVQVPIGAESSLSGLVDL VHMGRGFYMGAAQTQVSEVEIPNSVSKSL  
 VEAKRQELIEQVANVDDQLGELYLSEANITPEQLKSAIRRA TLRQFFPVFMGTSLNKNGVQSLLDGVIDYLP CPRERDN  
 VALNLSKNEEQVPLESNPNKPLVALAFKLQEHKFGQLTYMRIYQGTIRKGDQLLNTK TGKKVKIPRLVRMHSDEMEEI  
 AECGPGEIVAMFGVECSSGDTFTDGTQYAMFIVWNGYSKALGRFQREDPTFRV SFDKESQQTIIISMGELHLDIYVER  
 MKREYKVDTVVGGPQVSYRETITKPADFNTHKKQSGGAGQFARIIGSIEPIGFDQPCFVNAL VGNVPPGFVPACEK  
 GFAEAAEKGPLLGHIVQGVRTTIKDGLAHSVDSNELSFR LASIYGFKAQAFDKAGPVILEPIMAVEVSVPTFEQGTVGGI  
 NKRKGTILNTEREGYTHIETHVPLANMFGYSTELRSATQGGKGFESMEYHQHMPVSRQTQELIEAYKQRKEDNK

>Malawimonas\_californiana@prot\_5

MADIFLFTSESVNEGHPDKLCDQVSDAVLDA CLREDPQAKVACETCAKTGMVMVFGEITTSANLDFQRIVRDAVKEIG  
 FDHSDKGFYKTCNVLVAIEKQSPDIAQGVHLNRDEM DLGAGDQGMFGYATNETKEMMPLSHVLATQLGLRLTEVR  
 KSLGCLPWLDPGKTQVTVVEYQKTSRVEPLRVHTIVISTQHIEGVTNEQIRADLHEHVIKPVVPAEYKLDTIYHLNPSGR  
 FVIGGPQGDAGLTGRKIIVDTYGGWGAHGGGAFSGKSPDKVDRSAAYAARWVAKSLVAAGLVDRVLVQLSYAIGVA  
 HPLSIFVETYGTKRSDAELLSIVKKNFDRPRAIHKALKL TEPIYSKTACYGHFGRAEFAWEQPKTLEM

>Malawimonas\_californiana@prot\_6

RRKLSIHTIPTSVPVKTVICITIGPGINTVEKLAELMYHGSVIANVRAAAKVNKPVAIMLDTMGPEIRTGKLEGGKPV  
 LRTGQPTIFNTLIVGDSTKCGVTYNHITQVLSAGSLLIDDLG LIALVNSVHSDRLECTVKNGLLGETKGVNLPNCV  
 DLPVATARDKDIIEFGIEGIDAIASFRQAENVREIRSILTQSRNPNAQNMIIHSKIENVEGLNNEFEEILHESDGMVAR  
 GDLGVEIPIQKIAMAQKLMISQCNVAVGKPVITATQML ESMIKNPRPRAETTDVCNAVLDGSDCVMLSGETAKGDYV  
 ECVQLMVSICRETEAGINYYVSHKYLRRTASVSGGVSEVISATAVKAEEEMGAKLMVVLTETGATARHVAKYRPSVPI

LCINSHDMVARQCQVSSRDVCFSRGVIPFTVDSMIGTDAIVLQALAFATSAGLCQSGDIVVLVSGYKEGIPGQTNMIKKL IAP

>Malawimonas\_californiana@prot\_7

MAEVSEAYPDFISQRVALFEQIKAKQAAEPRDKKPIKITLPDGA VKEGVAFETTPLDIALSISKGLADKIVA AKLDGGVV WDAWRPLESDCTLQLLKFEDDGKKVYWHSSAHILGQAMELEFGGKLCIGPALEEGFYDDIGGDVVVSEADYARLEA RVKKIIDQKQPFERLLVPKEVALEMFKYNYKTEIINQKVPDGDVCSVYRCPGLIDLRCRPHVPNTGKVKALKVTKSSA AYWLGKNDNSLQRVYGISFPDAKQLKEVWHFQEEAKKRDRHRNIGRDQELFFFHERSPGSCFFLPHGTRIYNKLTAFIR RQYWKRGYTEVVTNPNVFNKLVQDSGHWAHYKENMFSFAVEGQDFALKPMNCPGHCVMFHGHRSSRYRELPIRFADF GVLHRNEYSGALTGLTRVRRFCQDDAHIFCMPSQIMDEIRGVLDLQEVYGFIFGFTFDELSTRPKDFLGEVAQWDEAE KALTDALNGFGQPWKINAGDGA FYGPKIDIRVFDALRRRHQCATIQDFQLPQRFELTYEAGGGRMETPIIVHRAILGSI ERFIAVLTEHYGGKWPFWVSPRQVRVLTLDTKCQDWARQVESKLAAGYYVDTDFGDAKIEKKIRHDVQRRPDRAG QLHPCGRTQGGCRRREGQRAHPR

>Malawimonas\_californiana@prot\_9

MRAALSAVSRISFSSVRTASRWSKVEMGPADPILGLTVSFKN DPNPNKVNGLGVGAYRDDNGQAFTLPCVREAEKRLV GADHEYGPIGGVPGFTKAAAALIFGEDNAALKDGRVATVQTL SGTGALRVGDFFIRRFQGALPVYMPNPTWPNHKNV ARDSQLGAVKEYRYDYDKASKGLDMQGMVADLAAENPENSFILLHACAHNPTGADPTQEQWKEISKVCKDKKHPIFFDS AYQGFASGDPAKDAFAVRRFIEDGHDVVVAQSFANFGLYGERAGAFHIVCSSPKENEILLSQLRILIRPMYSNPPVTGA RFVETILNDKALTKQWHSVDKLMADRIISMRHALVDGLKKAGSSHNWAHITNQIGMFCYTG LNP EQVKMIEKHHIYL TGDGRISVAGLTSKNVKYVADALHDVTK

>Malawimonas\_californiana@HslVU

ELIPREVV AELDRYIIGQGEAKRAVAVAFRNRWRRRN LAPNLRNEVIPKNILMIGPTGVGKTEIARRLAKLTNAPFLKVX XXXXXXXXXXXXGRVDTHIRDLVDVAIHNQKQATKERXXXXXXXXXXXXXXXXXXXXXXXXXXXXXXXXXXXXXXXXX XXXXXXXXXXXXXXXXXXXXXXXXXXXXXXXXXXXXXXXXXXXXXXXXXXXXXXXXXXXXXXXXXXXXXXXXXXXX IHDARTVIEDEEVEKLASEESVIADALR AVQEDGVVCIDEIDKIVVSSKDRTTSNASDEGVQKDLLPLVEGTTVTRYGNVDTGKILFIASGAFHSVKPSDMLAELQ GRLPIRVELKPLSQHDLYRILTEPETS LIKQJALMKTENIDLVEFDDAIREIAAVATSNASVENIGARRLHTIIEVLEDV SFNCDKYRGQRLVITADQVKRSIAELETQDLKKFIL

>Malawimonas\_californiana@Hsp78

MARAGKLDPVIGRDEIRRTLQVLSRRTKNNPVLIGEPGVGKTAIVEGIAQRIANGEV PDSVKNKRVISLDLSSLLAGAK FRGEFERVSVLKDVIKAEKGVILFIDEMHTLVGAGAAEGAMDASNMLK PALARGELHVMGATTTAEYRKYIEKDAALARRFQSITVPEPSTDTIALLRGLKEKYEVEHVGVRIMDASLVFAAVNAHRFISERFLPKAIDLIDEAASRLKMQMESK PDPIEKLAREVMMRIELEALRREPDPSPNEKRRAVLEKEVVEKQASLDQLNRTWQQEKDALEKVKAAKRQLDQAKNE FVLSQRSGLLARASELKYSIIPKLEKDVAFQSENKLSMLSDALRPKDIAAVIARATGIPVENLMMDEADKLLHLEDRLR ARVVGQEHALRVIDAVRLSRAGLHAHTRPLGSFLGPTGVGKTELCKALAEVLFNGDNTMTRIDMSEYMERHSTSR LIGAPPGYVGYEEGGTLTEAVRRRYPQLVLFDEFEKAHREVANLLLQVLDDEGRLTDSQGRTVDFRNTLIIMTSNIGADA LASLPEGATSEQARPQILAAVRRHMAPEFINRIDEMVLFNKLGRGVMSDIVNVQLKQVSRMLEEKQLT LSVSPA AHAW LAEQGYDFTYGARPLKRVIHQHLLNPLARL VIEGKVPPLSTIAVQVDGSSSLKLEVRPPMTTP

>Malawimonas\_californiana@mHsp60

MFRSAANPVARLARLSFPVRQYAAAGKEIFGADARKKLLKGVHKLADAVAVTLGPKGRNVILDQSGFAPKITKDGVT VAKHIEFRDRYENAGAQLIRQVASKTNDVAGDGTATILARYFFAQGCKSVEAGLNPMDVRRGINAAVEKVIEDLKS RSIDVTNKDQIKQVATISANNVVKIGELIADAMEKVGEKGAITTDGRTLQDEL DVVEGMKLD RGYISPFVTD AKTQR CELENVHVLVVDKKSINIQGLVKALEVSVQKGGSLIVAEDEVGDALATLVNVRVRA GLKVC AVKAPGFGDNRNKIL HDIATMTGAVLSEDEVGLKFDDTLAVEQYLGSCCKKVSVDKDDAIIFFGGSGNQDAVSERLDQLRDAIKQTTSDYEAKEL QERLAKLTGGVAVIRVGGATEAEVNERKDLVTDALHATRAAVAEGVLPGGGSALLFASRALEGFKLANFDQDHG VSI VREALKVPAKTIASNAGIDGGVVVEKVLASSNTHGYNAQTSAYVDMIKEGILDPTKVVRTALMDAARIASLMTTAE A VIVDLPKEEPAAPARGGMGGMDMDY

>Malawimonas\_californiana@mHsp70

MFSRILCQPLRRLPFRRLRAYADAAPTGPVVIDLGTNSCVATMEGQNPRVLENAEGARTTPSVVAIQKDGTVLVGAPA KRQLATNSQNTFHGKRLIGRRYDDPMVRKEQQMVGTYIVKADNGDAWVEAQGGKYSPOIGAYVLT KMKETAETH FGGPVKNAVVTVPAYFNDAQRQATKDAGRIAGLDVLRINEPTAAALAYGLNSGKHSKIAVYDLGGGTFDVS VLEIVE GFVEKATNGDTFLGGEFDARL TEYLVDQFAKENGMDLRKDRIALGRLREAAEKAKIELSSTNQTDINLPFITADATG PKHVQMTLSRAKYETLVDLLKKTLEPCKQCMKDSGFKNEDLSEVVLVGGMTRMPKVTELVRGLFGKEPFKGVNPD E VVAVGAAIQGSVLTKTGGVLLDVTPLSLGIETLGGVFTLIPRNTTIPTKKSQTFSTAVDNQPSVEIKVLQGERELAA DNKLLGQFQLVGIPPAPRAVPQIEVTFDIDANGIVNVS AKDKDSGRQQITL KSSGG LAEDDIKRMVQEAERNKTADTQ RKALIEAKNEAETTYSLEKLTTEHREKIPEADRTKVQEAIAEVRKATEGDNVDAIKSKVAALSSHNMRLYELVYKQG GQQQQQSGDSSNGDKKQ

>Malawimonas\_californiana@mrl3

ALDARNLIRSENLTEEELKSSLTEEDFGVTSARYTPTASNWTPQSKRVGVV ARKEGMLSLQDEWGRWWPLTLLKLENT QVTQVKTKETDGYDAIQV GIEDILPRKTTKAMIKHFEKAGVPPKRKTFEFRVTPDALLSPGTTITARHFVPGQYVDVTGI TKGHGFTGAMERWGFGLRASHGVSVSHRSHGATGQRQDPGKVFKGK MAGHMGVDQRTIQSLRVYQIEAKLNCLL VVGSVPGPKRGFVRIRDALRKHVVPFPFTVAPPSETPETMPDIVVADPGDPFAPMVEETE

>Malawimonas\_californiana@mtif2

MQKVSGVSWKGTAEARAKPPSDGFTLSDELAKLRRPKPDHGARIPAAHTHQPRHAPSTVQHRFVGDRTVVIGDSIPIRT LATEAGARVVDVLKALILGENPRSVSAAISGDAEALALEEMMLRKWVSTVKITRLRPREINVSRYTRERIAKDVSA G TQYPAKSPVATILGHVDHGKTTLLDALRHTAVAAKEAGGITQSIGAFSVARPEPTRRITVLDTPGHAAFTQMRKRGA A VTDVAVVVVAADDGKVPQTVEAIRHAQDAHVPMVVALNKCDKEGVDVAVVASLAQYGVVTEAEGGDVQVVRISA LQALKSGGTDGNLSALIDAIDLQADLSGICMAPTDVPAEUVIEARNDKQVGPVAVVITAGTLRVGD AFVCGCSY GK AKHFAVNGQRVSSAPPATPVDLMGLKEAPAAGDDFVVEDEKARKIAAWRCELRESNNEMRRKRAAVRMADA AKR GVIELPVVKADMHGSMEDIAEALETAHIPSNEVVVRVVGSGVGNVHESDIDLANA AKAMLIGFNVKANASVMAVAR MHGVAVRTYRVYIDLVEKREQLTALLPTTEEIVVNGRAEVAQLYPIRGKKS GATQNVAGSRVLEGAIKRSSAVRLMR DGTEIWSGKIFSLKHFKEEVSEIEKGKCEGILLDDCADLQQGDVIECVETVKRQRTLEDSAAASHKAVR

>Malawimonas\_californiana@nad10

ASRVPSLAALQSSVPSDKAAAHVSPASQKSQSTAVEPSAAGKVRKFDLSEKPKGGLEYVSKLDSLNVNWSKSSM WPMTFGLACCAVEMMHAAAPRYDLDRFGIVFRASPRQSDVMIVAGTLTNKMAPGLRKVYDQMAEPRFVSMGSCAN GGGYYHYSYGVVVRGCDRIVPVDIYVPGCPPTAEALLYGLLQKQKIGRQRTL

>Malawimonas\_californiana@nad11

GIHATARACAAPAKTLKMSVDGKEVEVDASFTVLQACAVAGVEIPRFCFHERLSIAGNCRMCLEVEVEKSPKPIASCAMP  
 VAPNMKVFTNSEKTKRAREGVMFELLANHPLDCPICDQGGECDLQDQALVFGKDRSRFHEYKRSVEDKNIGPLVKT  
 VTRCIHCTRCRVEASEIAGVEDLGMTGRGADSQIGTYVEKMFDESELGNIIDLCPVGALTSKPYAFTARPWELVRTE  
 VHAIGANISLDTRVGEVMRVLPRINEDVNEEWLSDKRSFSYDGLKRQRLHFPMIKKPNGEYISATWQDTLQYIKERL  
 GVPGTNIRALVGNLADCESMMALKDLVNRLGSENIESREDGMKVSPLRASYLTNSTIAGAESADVLLIGCNPRVEAP  
 LFNTRLRKAYLYNDALITYIGPKQQLTYDANHLGDSVSVLKDILKGAHPLAKVLQQAQRPVVVGGAAALRRPDASGIL  
 EAVGQLAHKTPNLVQPGVWNGVNLHTAASRVGALDLGIVPGTAAQSSATGRSVLYLLNADDFGEEAVKTSGSDTFVI  
 YQGHGDKGASRADVILPGCAYSEKDATYVNTTEGRVQRTKRAVGGPPGDAREDWKIIRALSEVLGVALPYDVTVKLRQ  
 RLADVSPSFARVDKREPATIMPOVPSSAPTLDTTVPMASGVTNFYMTDPISRASQTMARCTA

>Malawimonas\_californiana@nad7

MESRNFVTFNFGPQHPAAHGVRLVLELDGETVVRSDPHIGLLHRGTEKLEIYKTYLQALPYFDRLDYVSMMSMEHCYS  
 MAVERLLGCDVPLRAQYIRVMFLELTRILNHLAVSAHALDVGAMTPMFWAFEEREKLFEPYERVSARMHAAAYIRP  
 GGVSMMDMPLGLMDDIYQFIRQLPSRLDEIEELLTANRIWKMRLLVDIGVVTAQQAQDWGFTGVMLRGSGVPWDLRKTQ  
 PYEVYDKMEFDVPVGTGDCYDRYRCRMEEMRQSVRIVQQCLNQMPGEPVKSGDAKISPPSRQEMKTSMEALIHFK  
 LYSEGFSVPAGETYTAVEAPKGEFGVYLVSDGSSRPYRCKIRAPGFFHLQGLDFMAKGHMLADVVAIGTQDIVFGEID  
 R

>Malawimonas\_californiana@nad8

MPKSVAVVRSNSTQPTQPPNPDDIDPWHRRERLKNFKPKETSAKHLIDWTANSLITELVRGAIVATSVLFEPKVTVNYPF  
 EKGPLSPRFRGEHALRRYATGEERCIACKLCEAVCPAQAITIEAEPREDGSRRTTRYDIDMTKCIYCGFCQEAACPVDIAV  
 EGNPFESTETHEELLYNKEKLLANGDRWEAELAHNIEANFLYR

>Malawimonas\_californiana@ndufv1

MLSRVVALSRTAARLPVTVTSRGY AERAYGNLKDEDRIFTNLYGDAHGPDGWKIDGAMKRGDWHRTKDIIGKGV  
 IVNEMKASGLRGRGGAGFSPGMKWSFMPKQTDPRQYLVVNADEGEPGTCKDREIMRQDPHKLVEGCLVAGFAMRAR  
 AAYIYIRGEFDLEANRLEEAIIDEAYKAGYLGPNSCGTGYAFDVYVHRGAGAYICGEETALIESLEGKQKPKPLKPPFA  
 NMGLFGCPTTVNNVETIAVAPTILRRGAAWFSFGRKNNTGTKLYCISGHVNNPCTVEEEMSIPLKELIERHCGGVVGG  
 WDNLLAIIPGGSSVPLPKSICDNVLMDFDALKDVQSLGTA AVIVMNKSTDPRAIARLSKFYKHESCGQCTPCREGT  
 WLWSLMERMVVG DARVDEIDQLEELSRQIEGHTICALGDAAAWPVQGLIRHFRPVMQRIAEYQKAGTKAASVHA

>Malawimonas\_californiana@ndufv2

SAGALFVHRDTPDNNASTPFDWTSNDRKRIEKILSKYPAHYKRAKTIPLHLAQQKNGGWLSLAAMNKVADTLGVS  
 RVYEVATFYTMFNRNFVGHVQVCTTTPELCEGSGPVLDAIRTHLGVEVGETTADKEFTLMEVECLGACVNAPMMQ  
 INDDFYEDLTPDSAVEVLRGLKDRGRVVRVGPQGNARHTCEPSHKRTSLATPAWGPSAPNLDRVEPPKPEAPKGAADA  
 KK

>Malawimonas\_californiana@nsf1

SSKSTLAGRPYILDMQATTPVDPVRLDAMLPPYTEQYGNPHSRTHAYGWDSEEAVEAAREDVAKVIKADSKEIVFTSG  
 ATENNNMAIKGVARFYKQKQKHVITATEHKCVLDSICALQEGFDVYTLVQVQNGLVLDLESAIRPDTSLVSMG  
 VNNEIGVVQPIQIGSLCRKRGVFFHCDAQAIGKIPVDVNA MNIDLLSISGHKIYGPKGIGALYVRRKPRVRLPIQSGG  
 GQERGMRSGLTAPLIVGLGAACRVILEEQHNDTRHVTQLSRYLYDEVKRIELVTLNGDKESRYPGNLNL SFRFVEGE  
 SLLMALKQCAVSSGSACTASLEPSYVLRALGVEEDMAHTSIRIGIRFTTREEVDHIVSLELQHVQRLRDMSPLYEMW  
 KEGIDMKSSISWTGH

>Malawimonas\_californiana@odpA

RLLRSPASVLLSSRRGLASAAEISYEIPESYAYHKLDVKVDRKTKMKKSELMEYFKT MATMRRMEAEAEQLYKAKF  
 VRGFLHLYNGQEA VVTGTEAILKKTDSVITAYRDHCHFVGRGGSVRACLAELMGRFPGCSKGGGSMHMYLAKNNF  
 GNGIVGAQVPVAGLAFAHWYRQDGGVCFASYGDGAANQQQIFEA YNIAFLWKLVPVFCENRNYGMGTSIQRAA  
 SNQAFTRGDVAVPGIKVDGMNVLAVREGVRYAAEHARTKGPLVEMDITYRSGHMSDPGLSYRSREEVQATRQAR  
 DPELVRTWLTANGWATEALKAIEKEIRAEIQMSAELKTSPPVSEL TADVYVDTHS

>Malawimonas\_californiana@odpB

MQSSRILSLAGRVASSRSVFLIRFNSTAPAATEVPTKLTVRDALNSALDEEIERDDKVFLGEEVGGYDGYKVSRLG  
 WKY YGSKRIVDTPITEMGFTGIAVGAALAGLRPICFEMTFNLSQAIDHVNSAAKGLYMSGGQLRCPVIFRGPNGPAK  
 AVAAQHSQCFAAWYGA VPLKVIAPYSAEDARGLLKAAIRDNDPVVFLENEVIYGEAFDITPDVLSKDFVLPKAKIE  
 KIGTNTVTAFSRMVGVLEAAKIVKEADNIDVEINLRSRPLDRQTIVDSVKKTNRLVTVEEGWPQYGVGAEVAASI  
 MESDAFDYLDAPVQRVSGADVMPYAQNIEDLATPTPQIVADAIKACYKK

>Malawimonas\_californiana@PCCB

MFRQALLGLRQVTASVRSQRLRFNSSKIEALRQSSLGGGEHRIAAQHKKGKLTARERLALLLDQGSFVELDAFVEHR  
 CTRDFGMEKQRFPDGVVTGSGTINGRPVYVFSQDFTVFGGALSETHAQKICKVMDKAMLIGVPVIGLNDSGGARIQEG  
 VASLGGYADVFRQNVDSAGVIPQLSLIMGPCAGGAVYSPAMTDFMMVRDTSYLFVTPGDPVVKTVTHEMVTAEELGG  
 ARHTTTKSGVAHA AFENDLEAMRKTREFFDYLP LNREGPPVPCEDPRTAELS LDRVVPADANMPYNMLDVIHKV  
 VDNGDFELQPEYARNIVIGMARMEGRTVGIVANQPKEQAGVLDIDSSTKAARFVRFCD SFNPIITFVDVPGFLPGTKQ  
 EYNGIIRHGAKLLYAYAEATVPKLTVITRKAYGGAYDVMGSKHLRADS NYAWPSAEI AVMGAEGAANIIFRGPDLPA  
 RVAEYKNQFANPLAAARRGFLDDIIRPHQTRQVLCRDLELLKNKEYERPARKHGNIP

>Malawimonas\_californiana@sdh1

PAARRMASSDPAAYPIIDHTYDVVVVGGAGLRAAFGMANAGYKTACITKLPFTRSHYVAAQGGINAALANMTEDD  
 WRWHA YDVTVKGSDWLGDDQDAIHYMCREAIPVIELEQMGPFSRTKEGKIYQRAFGGQSLKFGEGGQAYRCAAAED  
 RTGHALLHTLYGQSLKYNTTEFFTEYFALDLIMENEGCRGVIAMCLEGSLHRFRSHKTVLATGGYGRCYLTATSHTC  
 TGDGNAMVTRAGLPIQDAEFVQFHPTGIYGAGCLITEGARGEGGYLLNAQGERFMERHAPTAKDLASRDVVS RAMTV  
 EIMEGKGVGPKDHDVYLQLSHLDPALLHKRLPGISETAAIFAGVDVTKPEIPVLPVHYNMGGIPTNYMGEVVTIKDGN  
 PDHVVPGLMAIGEAAACVSVHGANRLGANSLLDIVVFGRAAVHRVQQLAKETPHRPLPKAGHESIDNLDKLRNGQG  
 XXXXXXXXXXXXMQRTMQRYYAAVFRKQDLETTGCKELTRIPDLNLLKLDHGRMIWNSDLVEALELQNLMTQAMITM  
 YSAEARKE SRGAHARDDFTKRDDKTWMKHTVGLDVPVTKVSLDYRPVHMNTLDENEMKPIPPKQRYV

>Malawimonas\_californiana@sdh2

MLRSLSTLSRFARSAAPTAEKAAASAKPAAAAMPTKKAPDVRRFQIYRWDPEKNEKPRLQSYDVMSCQCGPMVLDVL  
 IKIKNEVDPTLFRRSREGICGSCAMNIDGTNTLACLRAVDQKSMKIYPLPHMAVIKDLVPDLTNFYRQHASVQPYLK  
 YKTEPAPVSNLQSEEQRAKLNGLYECVLCACCSTSCPSYWWNGDKYLGPAILLQAYRWIADSRDQFTRERLESLEDDA  
 FKYLRCHTIMNCSRTCPKGLNPALAIKIKSQISEL

>Malawimonas\_californiana@SUCLG1

MFAVRGRTIIAAAPRSLLSAVRSYAAEASAGPPYVFVDRNTKVICQGFTRQGTFFHSQQAIEYGTQVVGVSPPGKGGSTHLGLPVFNTVSEAVRTTGANATSIIYVPPPGAKAAIIIEAIEAEIPLIVVITEGIPQHDMAIYVKHALRSGSKSRLIGPNCPCGVIKPGECKIIMPGHIIHLPRIGIVSRSGTLTYEAVAQTTANLKGQSTCVGIGGDPFNGTDFVCLKLFMNDPQTDGILLIGEIGGSAEEDAADFIKAHPKQPVAAFIAGSTAPPGRMRMGHAGAIISGGKGTAGDKIRALTAAGVTVAESPARLGDAILKAMKERGKA

>Malawimonas\_californiana@tufA

TPVLRFLFSAMTAAAPRPTVVHSYTIVRGMAKFERFKPHVNVGTIGHVDHGKTTLTAATKVLADQALAKFVAFDQIDK APEERLRGITIQSAHVEYETKNRHYSHVDCPHGHDYVKNMITGAAQMDGAILVVSADDGPKPQTRHILLARQVGVPH LVVFMNKVDKVDPPDLEL VEMEIRDLLKFYKFPGDETPVIRGSALHALNGTDEQLGRAAILKLMETVDSYIPTPPRAV DKPFLMCVEGVNSISGRGTATGRIEQGIVKVGDEVEIHGLGKSGEKTVTGVMFRKELDQGGAGDDIGALLRGVGR DDIRRGMVLAKPGSVKTHTRFEGEIYALKDEEGRRTPFMNRYRQVYFRTADVTAGVTLPQGTETMMPGDNCKLTF QLQYPVVLNQLRFAIREGGRTVAGIVASIVE

>Malawimonas\_californiana@TypA

PRVTSLSRANTAPILQRLQFSARFASKIDGIRNVAIIAHVDHGKTTLVDTLRQSGTMSAIAQGARVMDSNALEKERGI TILAKVTA VNWQNKRNIVDTPGHADFGGEVERILSMVDGVLLVDATEGPMPTKFLVSKALRQRLRPIVVLNKAADR DTSRPFSEVTEIFDLFCALDCAEDQDFSVLYASAKEGWA VRSLSDKRESMQPLDITXXXXXXXXXXXXXXXXXXXXX XXXXXXXXXXXXRILTGRVYSGSVLVNDRVHALKRAESTKIEEGRVLKILQRSGMERYTVDKGIAGDIISVGLSAATVGD TISSIXXXXXXXXSPAIDPPTIAMQFNPDSPLAGTEGSQVSTMVGERLRAEAEVNVALQVKQMGETVEYVRRGELQLG ILIENMRREGFELSVSPPTVVYREDEQGNKLEPIEEMIDVDAEFMGVVIEKMAIRKAEELDSKDVAGKTRLRFLCPSRG LIGFKSEFSTETRTGIMHHVHFSYKPFKGPMPNQTRKGLVMSMDGVSTHYALQNLDRGTMFITPGVKVYPMIVGE HTRDNDLDVNVSKAKKLTNVRATATDMGALALSPPRILKLEESISYVKTGELVEVTPKSIRLRKPGEMDSAKRVAARD AKK

>Malawimonas\_californiana@CLPP

IMFSLCRRLLQPASICRWASYSPTRALIPMVIEQSPRGERVFDIYSRLLKERIIFLNGEVHDDSAVVVAQLLLQAEDH AKPVFLYINSPGAVTAGMAIYDTMQFIRPEVHTLCMGQACSMASLLLAAGSLGHRMILPNSKVMIHQPHGGTSGQAS DIAIHAKDILETRRLNDLLS

>Malawimonas\_californiana@Coq7

MADQEEKHLEKFKKMVGKEKRVPTVLEPVWNAAGYALGVASALLGERAAMACTVAVEDVIAEHYNGQLRDLKAG ADKAEALFDITIRAFRDEDMGHHTAMQHGAAPAYGALTAAVKGATRTAIFLSERL

>Malawimonas\_californiana@ETFDH

QLHTRSALYSTASPSEHAQQGTQKQSESETAVDPRTOEPRAAEFDDVVIVGGGPAGLAASIRLQKLAQNQRDVRVCVI EKAAEFGRHTLSGAVMETRALDELIPQWREKEAPLHTPA THDRLYLTERGAYRLPLPREMNNHGNIVSLSQVVRWL AAQAEAGVELYPGFAGAEILREGDKVVG VATGDVGVGKRGEIKSGYSRGMELRGKVTLFAEGCRGSLTRQLYSMYN LEQGEPTQYIGLKEVWEVDPAVHKPGHIMHSFGWPVKDAYCGSFLYHMKPNLISLGLVIGLDYKPNPYSYHEFQRF KHHPLVKPLLEKGTICIEYGARAHIEGGWQSLPKLTFPGGALIGDCAGTLNVPKIGTHTAMKSGMLAAEHAFAELDQA QSLDKYDSALRESWVGKELYAARNVRPSFDLGFIPFVLISGTESYITRGLKPFTHHHGRDSQSLRPAEACREIVYEKPD NKISFDLLTNLQRTNTNHEEDQPHLRVTDVPVKARVSYTKYAGPEGRFCPAGVYEWIKDEQTEPKLQISAQNCIHKCT CDIKSEFITWVPPPEGGGGPMYTNT

>Malawimonas\_californiana@ndufa9

SIARTNPEQKRGI AFHQVTPGARASVAGVPVTLGATGFLGRYVVSSIGNTGSQIVVYRGNESYRHLKLAGDLGQIV PIPFHPKRIDTIAQAVEHSAVINLIGRNYETHNSSFEDVNVRLAGDIAKVCTEAGVQRLIHVSALAANDPHATSRWAQT KRRGEEAVRKAFFPDATHIRPAPVFGPEDRLSQKEATVAKFFLFPFI FGSDSRIQPTWVLDVAEAILNATRDIHTAGKTYEL AGPRVYTRKQFMDEILDIAGLWRARPVPVPSLLAAVPAWFLERIPPIEYVTRDMLKQY AQDIVRDDSALGYEDLHITPQ SFEKHAVSLLRGRFPKKAHIGFEITNES

>Malawimonas\_californiana@ndufaf5

DTMEVFDQRQYKRLQRNRIARANAPDFDLRDQIADTLVDRLXDVPRDFPNALDLGCGSGSIIRHLNRGGIQTIVQCDX XXXXVKA YRVHADEEFLPFQHGSDLVMSNLSLHWINDLPGVFQQVRKILKPDGMFLGSMGGQTLTELRTSFVVAES EREGLSRRMSPMADVSDVGLISSAGFNLPVDVETVTLNYASPFVLLHELMMGEANA VNSREMTLKRDTLLSMA ASYQALFGNADGSPATFQV

>Malawimonas\_californiana@NifU

RRSLFIRPARTPNENSMQFFPTXXXXXXXXXXMEFKSIREENTQKSPLAKLLFQIEGVESVFM SHNFVTINKTEETEWDIL KPHVFAALMDFDSDGQPVYTDMPVTDITLPEDEVVAMIKELVETKIRPYVLRDGGNILYRGFKDGYVHVQMTGSC SGCSASDTLKKGVESMLMHYIDDVKGIVRVDEAGDDVNSALQLEERLARAKKESKA

>Malawimonas\_californiana@PCCA\_

ANRGEIALRVFRITCKKLGIRTVAVYSDADKDALHVQLADEAVRIGPAPTNSYLNADAVLEAARKSGAQAIHPGYGFL SENA AFSEAVTKAGITVGPNNAMRALGDKIQSKHIAKEAGVSTVPGYVGEVNSEADA IKIANQIGYVVMLKASAGGG GKGMRVAVWDDDDVRTGYTISREEAKSYFGDDRLLIEKFIESPRHIEIQIMADSQGVLYPERECSLQRRNQKVIEEAPS VALDDATRSMGEQAASLARA VGYQSAGTLEFLVDPRKNFYFLEMNTRLQVEHPITEYITGVDLVECMMLVAAGHPL PMKQSDLKIKGWAVESRVY AEDPLKGLFPLSIGLLTTYKEPPVTDYNLRVESGVTEGSEISVYDPMISKVVSYGENRDQ ALLRQKNALDSYVIRGLNHNIPFLRSVLDHPRFIKGDNLTKFIPRDAPKGFSGHALTARQVKELVGA AATMHMMRTQR DASISDRLDSS

>Malawimonas\_californiana@PET112

WQLVVGLEVHARINSPKCLFSGASTDIDAPPKNVALFDSAHPGTLPVNLPHCQEAVRTALALRGRIALHSTFDRKHY SYHDLPHGFQITQKLCVMSGGLEVKLENKEVVVPIQHLQIEMDSGKTIQDLSTLYVDLNRAGVGLMEIVTAPVMH SSAVAGQFVKQLQTLRHRIGTCDGNMQDGLSRCDVNVSVTHRVTQQRGARIEIKNLNSIRSVVRAIDYEYERHVDLLTR KEELKPETRSFDAMSNTTQFMRSKETHLDYRFFPEPDLPALVLEEIRKSLPRMPEQIAADLVSNY AISQADAALLTCDLR VLDFFEQA AKGRSGKKVANWYVSELFLLAGAKRPFDESITPQQLGSLIDALDAKTIXXXXXXXXXXXXXXXXXXXXXX XXXXXXXXGLTDTDEASLRSLCERVVQSNPTEVAKYKAGRTRVFGFFVGA VIKETR GKADPETVNRIVRELLDR

>Malawimonas\_californiana@UQCRC1

RRLVSSSQQFSLALRRISA VIPTTTTTNGIRVATEEKAGETATIGVFIDAGSRYEYEQNNGTAHFLEHLAFKGTSNRTQ QLELEVENIGAQLNAYTSREHTVYAKVLKKDVPRAVNILADIIQNSLYPEERIEAERSTILREMEEVERTFEEATFDRL HETAYQGTALGRITLGPENIRTIQRXDLKDFVKTHYTGKRIAVVAGAVSHADLEKLTQSSFGSLPAESATPVHKTPC KYTGSVDLVQNDMDLTHVALAIQGVGWKHADSIPLMVMQIIIGAWDRNAGSARHLSSKLAGEVHRYDLARFMSF NTVYSDTGLWGTYAIXXXXXDETLDDL CYAIENEVWRMCFDVTEAEVERAKNQLKSSLLVQVDGTTQTCEDIGRQLL TYGRRVPVAEMLQRIDXXXXXXXXVRRVASTYIYDQDPVMAMIGPVAGAPDYNRLRKWTHWYRT

>Malawimonas\_californiana@UQCRFS1  
RSL SRL PL STIR SSARALASSSSGGDPKTGYQVADDFHHGPD RARSNVGGDVG RKMFAYSVLGTA AIYAASVRNTVV  
DFVDSMNSPADVLALASIEVDIQIAEGD TMVVKWRGKPIFIRHTAAEIEAAKSTALSELKDPQEDAVRVQDPAWLIV  
LGVCTHLGCVPMVKQGDYDGLCPCHYSHYDTSGRIRKGPAPLNLEVPYQFIEGNTKVRIG

>Malawimonas\_jakobiformis@atp1  
MICLSFVFRYFQARLFTTSSAARAAPTASEVSR IIEDRIKFSFSHKAEEVEEVGRVISVGDGIARVHGLLNCQAGEMVTFA  
GGVKG MALNLERNVGVVIFGNDRVIKEDLVKRTGSIVDVPV GKAMLRVVDALGNPIDGKGAIDTQTRSRVEVKA  
PGIHPRQKVAEPMMTGKAVDSMVP IGRGQRELIIGDRQTKLTAVIDTIINQK FVNDTGEKRKLYTIYVAIGQKRSTV  
AQVVRLEKHDAMKYTIIVAATASEAAPLQFLAPYSGCAMGEYFRDNGMHALIIYD DLSKQAVAYRQMSLLRRPPGR  
EAYPGDV FYLHSRLLERA AKMSDANGGSLTALPVIETQAGDVSAIYPTNVISITD GQIYLESELFYK GIRPAINVGLSVS  
RVGSA AQERAMRQVGGRLKLYLAQYREVA AFAQFGSDLDAATQHQLNRGARLTEM LKQGGYSPLMEEQV VVIFGG  
VNGYLDKLPVSEVGFVFRK YIKDKHATLLD TIRKERM TDASTEELK KAYD GALNAWSAAK

>Malawimonas\_jakobiformis@atp2  
GPKGKIVQVIGAVVDVQFEGALPPILNSLEVQNSDIRVVLEVAQH LGENTVRTISMEGTDLGVRGQGVVDTGAPIMVPV  
GRET LGRIMNVIGEPIDNRGPIS TKKAAIHAEP LFTQSSATEILVTGIKVV DLLAPYSKGGKIGLFGGAGV GKTVVIM  
ELINNI AKAHGGFSVFGG VGER TREGNDLYKEMIESGVIKLDGDSKAAALVYGQMN EPPGARARVALTALVAEYFRDE  
EGQDVLLFIDNIFRFTQAGSEVS ALLGRIPSAVGYQPTLATDMGAMQERITSTRKGSITSVQAVYVPADDLTDPAPATTF  
SHLDATTVLSRAIAELGIYPAVDPLDSTSRILDPTIVGEEHYNVARAVQKLLQNYKSLQDI IAILGMD ELSEEDKLVVAR  
ARKVQRFLSQPFHVAEVFTNQAGKFVSLKDTISGFKAIMEGQYDHLPE SAFFMVG TIDEAVDVAKKMAELGAK

>Malawimonas\_jakobiformis@atp3  
MAGETRGMATLKEVANRIKSVKNIAKITKSMK MVAASKLRRATASMMQAREYVAGIESFFEEAPTAEASTAVAAPAG  
TKRKH LIAVTTDRGLCGGLNSTVARQIRAMVKG FDSNTVPEIIMGEKGNAQM KRDLGPYFSYVFE LSKSTFTFASAS  
VVAEKILASNFDEATLVYNYFKNKISYVTTKRPIRSLKSFQEA KLEAGAYEFSDCLTDLYEFYVANSV FQSSVENATVE  
LSSRTMAMDNA TRNATQMIDRLTFYNRSRQASITKELIEISGAAA V

>Malawimonas\_jakobiformis@cox11  
GRKGKWDNTQIGLAVGAFALAGIAASYAAVPLYQMFCRATGYFGAVGRGDPAEAAA KAAAQONAVVRPITVRFTSD  
VSSNLPWSFVPIQKSIKIVPGETALAVYSATNKTD TPLIGVATY NVAPASVATYFVKVQCFCFEHQRLNPHESVDMPVLF  
YLDPEILNDPLLDHISAITLSYTFFLADREGQAAVQAAAL KLAEDSERERELGKVA AAVAQTADS

>Malawimonas\_jakobiformis@cyt1  
MAALTSRFVRAIAAAGAASLGIALLPRSQPAQTSGGELEPAEY PWSHKGLLSSFDHASIRRGFQVYKQVCSTCHSVELL  
AFRNLVGVAYTEDEVKALADYEITDGP DDEGEMFTRPGILSDKIPKPYANEQAARFANNGSLPPDLSLMVKARPRRE  
DYVFSLLTGYREPPAGVVVREGMHFNYPYFPGNVIGMAKLLTDDLVEYDDGTNPTASQA AKDVVTFLTWAAEPEHDDR  
KMGMKVLFVLGVALITTYLKRKFWNVV KHR TISFMDMHRGPGTRK

>Malawimonas\_jakobiformis@DLDH  
KCISLFAFVEMLSVIRLARSVAARATRAMSAAATTDVDVCV VGGGPGGYVAAIKAAQLGLKTACVEKRGALGGTCLN  
VGCIPSKALLHSSHLYEHALHDA AAYGVKITGVSM DVAQMLAQKDNAVKTLTGGIEM LFRKNKQVYVKGFGKLSA  
NEVVVDMS EGGQSKIRAKNIIATGSDV TPLTPVIDEKIVSSTGALSMQRI PKKMIVIGGGVIGLEMGSVWRR LGTEVT  
VVEYMDRIGAGMDA EIAAQFQRLLTQGMKFKMSTKVMGAEINSNGAVVNVEAAQGGKPEKLDADCVLV SIGRRPY  
TDKLNLSAVGVKTDKRGFIDINDHFQTSVPSIY AIGDVVRGPM LAHKAEEEGVAVAE LLAGRAGHVNYNAIPSVIYTP  
EVAWVGKTEELKQAGVKYRVGKFPFLANSRAKTVAQTDGLVKMIADEATDRVLGIHIGSTAGEMIAEGLVALEYGA  
SCEDIARTCHAHTLSEAFKEAAMATYDKPIHI

>Malawimonas\_jakobiformis@DLST  
IVIGAIRVARPAARSFHALQRASVRLPLAERLQHQH LTFSRMMAVKTYTMPQIADAVNEGTLAKY NKQVGDYVNEDEI  
IAQFETDKVAFEPKASGVITKLYAQV GQTVRTGDNVVDIDV GATAGAGAAK PAPA AEKAAEK PAAAAA APKAEAP  
KPAKAEAPKPAESKPSAATGAKPAAAPVM MSTAGRTERREPM SRMRQRI AERLKASQNTYALLTTFNEIDMSNLMA  
MRDDLKDEFLEKHKV KLGFM SGFVRASASALQAFPVINAVIDEQDIVYRNYVDISVAVSTPTGLVVPVLRD VDRMSFA  
DVEKAINELGVRARDNKLTIPEMQGGTFTISNGGVYRSMMGTPILNPPQSAILGMHGVTKRVVVNDQMVIRPMMYV  
ALTYDHR LIDGREA VFLRHIKACVEDPRRLLEL

>Malawimonas\_jakobiformis@etfB  
MRILVGVKRVIDHAVKIRVRGDKTG VETANVKMALNPFDEIAIEEAMK LKQAGVAKEVVALSIGPTGAQESLRTALAL  
GCDKAIHVP HDKGDNLTLTI AKIFRGIIGRENPNL VLLGKQAIDDDSNQTGQLLAGLLSWPQGT FASKVVVEGDKVSVT  
REIDGGLETILLKLP AVITCDLRLNTPRYPSL PNMKAKKMPITQVKLEELGVD AKNTLQTVSVEEPAKRKGGVKVDSVE  
TLLQKLKTEAKVI

>Malawimonas\_jakobiformis@grpE  
MQRLAHPMPWRALAPVRPLSVYSGVYAENDQGA EQKAQQAQSAEQAAKEQKPEPSQPEKEIAELKDKAKEFQDKWVR  
SLAELENLRKITQRDIAVAREYAVTEFAK DMLSVADNLERALTAVPEQARAENKLLQNL YDGVKMTQSGLASVLQRH  
GVVKIPTVGEKFDPNVHNALFELDDPKYAPGVV SQMTKQGYMIKDRVLRVSDVGVVRQPSQ

>Malawimonas\_jakobiformis@prot\_10  
ISKNNDEQYI WESNAGGTFNITLDTEGERLGRGTKIILHLKDDQLEYLEERRLKD LIKHHSEFINYPIMLLVEKTEEKEV  
DGEAEGEKKEKVTTFEFELVNKTKPIWLRKPEEISREEYQGFYKGLSNDWEDHLAVKHFNLEGQIEFTXLLFVPRRAP  
FDXFE PNKKNNIRLYVRRV FIMDNCEELIPEYLSFIK GIVDSEDLPLNISRETLQ QNKVLKVRKNIVK KCLDLFSEIAEN  
KDDFFK FYDAFSKNLKLGIHEDSANRAKLA EFLRFYSSKSADEMTSLTDYVTRMKEGQDQIYYITGESRAA VESSPFLE  
GLKKRNIEVLFMTDPIDEYAIQQLKEFQGGKLVNITKENLNLGESEEEKKRIEEKA AFEPLCKTMKEILENKVEKVV LG  
QRIVESPCVLVTSEHGWSANMERIMKAQALRDSSMSMYMTSKKTMEINPSHPHIIKELKNRVERGDKA VKDLIMLMYET  
ALLTSGFSL EEPASFAKRINRMIAMGLEVDEEAGPAADAASDLPPLEPAAEGISNTTSMEEVD

>Malawimonas\_jakobiformis@prot\_11  
MSDRPDNAP EHCPTESDQAGHASACQCPNQTIMEIKERLSTVKHKILVLSGKGGV GKSTVSSQLAFSLAAAGYQVG  
LLDV DICGSP IPKMTGLEGETVHQSSAGWSPV FDERMAVMSIGFMLENPDQAI IWRGPRKNGMIKNFLRDVDWGELD  
VLLIDTPPGTSDEHLSIVTYLKDAGIDGAVVVTTPQEVALLDVRKEITFCCKVGVRLGVVENMAGFVCP RCKGETQIF  
RPTTGGAKKMAEEMQVPLIGSIPLDPSLRVACDEGKSFQAVNAESPASKALMSVVQRMFCSAMFIIFLYSKLYNTPEK

>Malawimonas\_jakobiformis@prot\_13  
MSGAVKEFLRFVNASVSPYH AVHQARTALEAAGYELISEAAPWKLKAGGKYFFTRSQSSIVAF AIGGQFKPGNGFNVV  
ACHTDSPVLKVKPVSIHQ RAGYLVQVVEPYGGGLWHTWFD RDL SVAGRVLVRNGS QYVSR LVHIDRPI LRIPNLAIHL  
NRAVNTDGFQNLQTHVLPVLATAVKSELENPTGAKHQALLKLLADELKC DPADVADFDLVLCDTQPAQLTGAMEE  
FVASPRLDNLCMSFCGLKGLAEASGLDSESAVRVLALFDHEEVGSQSDH GAGSPIMLYVLSAELVKRVTSV FVAGSDTPP

DIVEVALRKSFLVSADMAHALHPNYAEKHEEHQPMHHRGVVLKINSNORYATSALTALPLRLVANRAGVTLQEFVV  
RNDNACSGSTIGPIIAALCGMRTVDIGVPQLAMHSIREMCGAADIDAAVQLCTAFYTEFTAIDASVQTELTATTAQKSAK  
V

>Malawimonas\_jakobiformis@prot\_14

AQSVVPTQQRSFASKLHPSESLTGTSSVIEEMYENYQKDPSSVDSTWREFFRRVDSGAPPGEAVSIMTPPMLESVRRP  
VVSOGAAPAVRHLTCVSDNDGDVAVRQAVYDTVRLMTLQRLHRVRGHLQAKLDPLCLQPAKHLSDLPATYGFDTAD  
MNRPVVAPPQVKDITNQSQYTTTTVAKVLEEIRSVYCGTVGVEYYHIDAEQRDWLQKEIETPAPALTREEKLWVYK  
HLSHAELFETFLAKKFGIAKRFGAEGGEAMLPLVESIVETASDSGIESVIGMPHRGRNLANTMRKPFRAILQGFQAH  
DEPVNKQQSDVQSGDVKYHLGTTVDRTLKNGKHIHVTLSPNPSHLEAVNPVVEGRTRAKQFYLGDKERSRVMSVLM  
HGDAAFAGQGIVAEFLAFSDLNFFKTGGTVHIIINNIGFTTDPNSRSTPYPSDIKAGAGAPIFHVNGDDPEAIVQVGR  
AVRWRQRFHKSIVDMVCYRRRHGHNETDEPSFTQPLMYKKAIAKKNPRVL YREKLIAEGSVTKEELDAIDNPFLELLEN  
EFKEAKSVYHNPDYDWIPKPKWELMAEPSTVRPTGVVEEVLLMIGKHLTTVPEGFVPHRLGKAVIEPRRNMESKGL  
DWGMGEALAYGSLVLEGVHVRLSGQDVERGTFSHRHAVVHDYSETPKRYTPLDCITKDQARFIVGNSSLSEFGVLGF  
EYGTLESPEKHLTIWEAQFGDFANGAQVIFDQFVSSGEAKWYTSQGLVCLLPHGYDGGQPEHSSSRVERFLQQAEDSD  
LKSSQWDEDLQRLNWNQIANPSTPGNFFHMRQIKRNRKPLIITSPKRILRLPASDLSEFLPGTAFKSVLPERDQLVSP  
DKVKRVVFCGQLYDYLNARKERQVKDIAIVRVEQLAPFFAAVQQAQYVADVVVAQEEPKNMGFWDYVVRP  
FENALNSAEGASYVGRPSAASPATGYPEQHRELRTLEHAMTPRKDKKVL

>Malawimonas\_jakobiformis@prot\_17

TVTRAPRLGIRGLLSYLELSKFRGLGALVVFSTTAGFVLASGSIWQDWATIDWSQCAWVSVGTAALVGAANTLNQVIE  
RNRDRVMARTLGRPLGRLSVAHAIGFAVVCCTAAGTYLHQHNSKLTALGLSNLCLYAFIYTPLKMWHPINTWVGA  
VGAIPPVMGAAAIVLPGQPSLRDLRFDAWLMGAVLFLWQIPHFALSYFIRTDYAKAGYRMLSISNPTLTARLAVRYCL  
YLLPVGLLAWAAGVTDWVYAVDSAALAA YMAWKGRPFVMQPSDSNARRLFRAALVYLPVAVMLLAIAHAKPLSERV  
AKTPLLQIGAPVSVTAAVQTDGVTTVSQRSEA

>Malawimonas\_jakobiformis@prot\_18

SPSGDGSHESTRPVRNVHFQIGTVSSFEKKLEQAQRELGITPDHWVAVHGEFLKLSPTLLLIGGWYLMRRMGAGGG  
MSQIFNVGKSPAHEMYKQGEVTRTFKDVAGLDEAKVEIMEFVDFLTPAKFTRLGAKIPKGAAMLVGPPTGKTLAKA  
VAGEAAVPPFISGSDVFEMFVGVGSPSRVRLDFAQARQNPACILFIDEIDAIGRHRGRIGGNDERENTLNQLVEMDGL  
KGLHHVIVLAGTNRSDVLDPALTRAGFRDRHIYIDLPAIKARKQIFEVHLKPLKLAEPMENYSKLLAALTPGMSGAEVA  
NVCNEAALHAAREGKKNIEIDFYAIDRVIAGLERKSRVLAPEKKTVA YHEAGHAVTGWFLEHADPVLKVSIVPRG  
AAALGFTQYLPKDRRLHSDKQLWDMVCMTLGGRAEAEQIFFGRVSTGAADDLDRITRILYQEVALLGMDSTFGPISYPP  
PGDGEMRFYKPYSESTAELIDERVRLVDAFDRTMKLLTEKKEAVAALAEERLLEKEVLSQEDVAQLIGVRPFKQQT  
YEEFVYGTGLPNSAGTTDSATTTTAAAAAADSGAAAVAGSAPESAPKSDSNEKDKKPE

>Malawimonas\_jakobiformis@prot\_24

STKTKFSDGPGMAAAAGSAGAASGVNPLTGRAFSQRYDILAKRKTLPVYEFRDEFFKLVRENQVIVLIPQFLIEMGLA  
AGRKRIACTQPRRVAAMSVSKRVSEEMDVLGEEVGYNIRFEDMTSQTILKYLTDGMLLREAMADPTLDQYSCIVLD  
EAHERTLATDILMGLMKEVLKARPDIKLIVMSATLDAERFQDYFTLEGRAEKAPLLKVPGRLYVPEIFYTPPERDYVE  
AAVTVTLQIHLCEKPGDVLFLTGEIEEETCKRLVRESKNIEQAGELVAVPLYSTLPPAMQRRIFDAAPAAKRPYGGP  
GRKVVVSTNIAETSLTIDGIVYVIDPGFAKQKVYNPRIRVESLVTPISRASAQQRAGRAGRTQPGKCFRLYAEKAFKKE  
LTPQTYPEILRSNLNTVLT LKRLGIDDLVHFDMDPPAPETLMRALELLNYL GALDDDGNLTEL GKMMCEFPDLPQLA  
KLLITAPDYNCSNEILSVVSMLSAPNVFVRPRESAAQADQAKARFTHQDGDHLLTNVYHAFKANGDDAQWCWENFL  
NHRTLKSVDNVRTQLARIMRKFNLPLVSTDFNSKEYYINIRCLCTGFFMQAAHLERSGQYLTVKDSQLVGLHPSTGLD  
HKPEFVYNEFVLTTKNFIRTVTDVKPEWLVEVAPHYDMDNFPDCEAKLVFKRIQQRAELMKRAQQQERQLYKR

>Malawimonas\_jakobiformis@prot\_25

RVHLLPITSIRMASGKPOLPAPGRVVLG PALSPTMSAGTISEWKVKEGDKVAVGDQALAIETDKATVSMDSQDDGYIAK  
ILKPKGSSDVPVSEPIIIIAENAADVAKFKNFELGASAPAAAAPAAAPKAAAAPAPSPAPASAPARXXXXXXXXGAGGDR  
VFASPAARKLAADSGVSLAGIQGSGPAPTHRVIKADVERAALVTAQAKTAPATTTAAAAAPTAAAPAAPRAAVPAGAYTD  
VPLTNMRKVIAQRLTESKQIPHYYLSVDVEMDALMKVRAQLNAAQKDAVKISVNDFLVKAALALRRVPVAVNNS  
WLGTAIRVNHTVDVSVAVQTTGLITPIVRNADLRGVAIAAATKDLAERARTNKLTLDEFQGGTFITSNLGMFGIKQF  
TAVINPPQSCILAVGAAQRRVVPVSEESTETKIASVMTVTLSCDHRVVDGAVGAQWLGVFRSLEKIPITMLL

>Malawimonas\_jakobiformis@prot\_26

PYHSLRTDAPVLDG AIDVNSEDFKANTNAMNEYIQELRKRVSVAKQGGDEVSRRKRVKMLPRDRVAALLDPGSP  
FLELSALAGDGLYEDKVPAGGIITGIGRVSGTECVIVANDATVKGTTYYPITVKKHLRAQTIAMQNRLPCVYLVDSGGA  
FLPLQSEVFPDREHFGRIFYNQAQMSAMNIPQVAVVMGSCTAGGAVYPAMADETIVVKGNITFLGGPPLVKAATGEV  
VSAEDLGGADVHCRNSGVTDYARSDEHGVALARRIVANLNRSKPRAPDAEPEAPAFDPREMGDIAPDRKQFDVRK  
VLARMVDGSRFDEFKELYGSTLVGTGWAHIIHGRVIVANNGVLFGESAAGAHFIELCGRGIPLLFVQNTGFMVGR  
KYENEGIAKHGAKMVTAVATAPVPKLTMIIGGSFGAGNYGMCGRAYDPRFLFMWPNARISVMGGPQAASVLATVQR  
EGYERQKHWPAEEEAFAKIEARYAHEGSAFFSSARLWDDGVIEPSTSRDVLGLALAAAHGTEPAPPNWGVFRM

>Malawimonas\_jakobiformis@prot\_32

TTLRTVLQIARVLQAALQRTPLHSFHVQRGAKMVEFCGYDMPVQYKEGVLTEHLACRQKAAIFDVSHMGQLHVEGK  
DRIAFMESLVCADISAATDGKSQLSVFTNEKGGIIDLIVTRTPDYLYVINAGCKEKDIHLKAKAAAASGLDVKLNIIET  
HALVALQGPAMSTLQKLLKDDLTRMPFMTSAVAVNGVQCRVTRCGYTGEDGFEISVPAEKSVALTEALLDTGKGN  
VLMAGLGRSDSLRLEAGLCLYGH DINEDITPVEAGLTW TISKRRRAAGGFPGFNIAAQIANGAPKRVGKTTAPAREN  
CEILDTTGNKVGVTSGTFSPSLKAAISMGYVPAALSKTGTAIQVVRNGKALPAQVVDLPFVPSHYKVPK

>Malawimonas\_jakobiformis@prot\_33

EYQDMIVIGGGATGCGVTLDAATRGLKVALIEREDFAAGTSSRSTKLAHGGIRYLENAVNHLDYEQLRLVDEALNERG  
IMLRTAPHLVKPLPILVLDVDRWWKLPKLVIG

>Malawimonas\_jakobiformis@prot\_34

MAAMPAGPAADVDANLLSVTLAKNMKPKQPHELT VFGHTFTDHMLEVEWVKQGGWGAPRIVPYHDLVLSAASV  
HYGLECFEGFKAYRSPQKPLFRPDRNFARMTNSARRLALPSFNEGQMLECVKLVSIDRDWPNARGYSYIRPTLIA  
TTPALGVAPPSNALFFVIMSPVGPYFKEGFKAVKLLAEETYTRAWPGGTGPAKVGGNYSILPQLEAAQKGYTQVLW  
LFGPNQVTEVGTMMNFVFWKNEAGETELVAPLDGTLPGVTRDSVLALTRGWKEFKVSRPYTIHDLIKANEGR  
LEAFGAGTAAIVSPVSAINFRGKEHRIPLDAKSSAQAGLARRLMSTLLSIQYGETQHPWTITVD

>Malawimonas\_jakobiformis@prot\_35

PQAQSKTDTKSSAGESDAKSDSQWSRYRTPITWGTVGGVFTGLGVVMMYYNYEKSKRSDVKVGVKSVGEMAIGGPFNL  
VDVNGKPVSDQDFRGKYMMIYFGFTHCPDICTELTKVGEVMEQLEKNPKTRGKVQPVFISVDPARDSPAQLKAYAAD

WHPKFVFLTGNDQVRAVTKAYRVVYYSKPEVVTADKDYLDVHSHIYFVDPEGKCTNFFTQSLGAKQVVERITTELTGG  
ELSFADYLRGLVGLRKHQDQ

>Malawimonas\_jakobiformis@prot\_36

MLRSLRLDVRTVTLFPGDGIGPEISLAVQEIFSAANVPIRWEPEFDVGTAKASAGKMPDEAIESVKNRNVALKGPLATPIG  
GGHVSLSLTLRRIFDLVANVRPCRSIAGYKTPYDDVDVVIIRENTEGEYSGLEHEVVPGIVESLKLITRPASQRIAYAFE  
YAKRYQRAGVVAVHKADVI

>Malawimonas\_jakobiformis@prot\_37

MRLLYRFYDVTGQDIRAVSLPSLRAIGVVPQDMVLFNDSIYNYIAYGGSSETTEADVHSAQAARIHVDVIQ  
RFPEGYQTKVGERGLKISGGEKQRVAIARTMLKQPTILLCDEATSSLSRTEVEILHSLKQLAQDRTAVFIAHRLSTIADA  
DEILVMDSGRVVERGTHESLM

>Malawimonas\_jakobiformis@prot\_4

APTAAPRVIPSVFRRYLLDPAADAERISHVRNIGISAHIDSGKTTLTERILYYTGRIREIHEIKSEVSGKMDSDMLERERGIT  
IKSAATYCAWKDAHINIIDTPGHVDFTEIVERSLRVLDGAVLVLCVSGGVQSQTTITVDKQMRRYHVPRVAFINKLDRGTG  
ADPWRVINDLRAKLRHNAAVQIPIGLENLDSGVVLDLDMRAFQFFGNKGEQVKEIDFPNELRTMAESKRNELIEQVA  
NVDDALGELYLSSEKIEADALRQAIRRVTLARKFFPVFMGSAKYKNGVQKLLDGDVIDYLPNPSERENFALDRNKDEEK  
VQLSSQSNKPFVGLAFKLEHQFGLQTYLRVYQGTIKKGFITNITTKKKVKVPRLVRMHSDMEDIQCEGAGEIVAMF  
GIECASGDTFTDGTQQVTMESMHVPEPVMSLAIAPKVKDKSDAFGKALNRFREDPTFRVDFDKESQQTIIISGMGELHL  
DIYVERMKREYGVDTIVGQPQVAYRETVATKTDNFYTHKKQSGGAGQFGRVIGYIEPLGPDQSEFVNAVVGNNIPPGF  
MPAIEKGFHEAVEKGPLIGHPVQGVRFVLTDLGSAHVSNSLSRFLAAIGAFKTAFFAAGGMVLEPIMRVDIQQVPREYQ  
GNVIAGLNKRKGVVLSNEEREGYTHIEAHVPLKDMFGYSTDLRSATQKGGEFSMEYHKLAPVPRNVQQLMDAYAKK  
RAAEK

>Malawimonas\_jakobiformis@prot\_5

LTGSCYVLAKMSTFLFTSESVNEGHPDKLCDQVSDAVLDACLRVDPHAKVACETASKTGMVMVFEITTSVAVLDFQKI  
VRDAVKEIGFSDSDKGFYKTCNVLVAIEQQSPDIAQGVHIGRADEDLQAGDQGMFGYASDETPEMMPLSHVLATKL  
GARLTVYRKKGILPWVLPDGKQTVTVYKREGGLVIPQRVHTIVISTQHVESVNSNDQIRKDLLEHVIRKPIVPMMLKDTI  
FHLNPSGRFVIGGPMGDAGLTGRKIIVDTYGGWGAHGGGAFSGKSPEKVDRSAAAYARWVAKSLVAAGLCKRVLVQ  
LSYAIQVARPLSIFIDTYGTATKSEQELLDIVNKNFDLRPRAIKALNLTQPMYHKTACYGHFGRSEFPWEQPKKLEM

>Malawimonas\_jakobiformis@prot\_7

MAAAAAEVPEFVQHRIRLFEEKAKQAAAPKKEEKISIRLPDGA VKEGIAGVTTPLNVAEGIAKKLAQNTVAKVNGA  
MWDARPLEDDCDLKLITFDEDEGKHVFWHSSAHVLGQALELEFGAKLCIGPALEEGFYDLASEVPVTPSDFTRVET  
RVKKIIDERQPFERLAVPKEVALEMFKFNKYKTEIISKVPDGTCTVYRCGPLIDLRCRPHLPNTNRKAFKVTKNSSAY  
VLGNKLNDSLQRVYGISFPEPKQLKEWVAFQEEAKKRDRHVIGTQQELFFFHERSPGSCFFLPHGARIYNTLMSFIKEEY  
WQRGYTEVITPNMNFVLDLWKTSGHYQNYRDNMFLLEVEGEFALKPMNCPAHCMFMFKHRTRSYRELPMRYADFGV  
LHRNEFSGALTGLTRVRRFCQDDAHIFCTLQGIQAEVKGALDFIKHVYGVFGFRFELELSTRPEKALGTVEQWDKA  
LAAALDDFGQEWKINPGDGA FYGPKIDIGVFDALRRRHQCATIQLDFQLPQRFELEYEGETGKETPVIVHRAVLGSLER  
MAILTEHFAGKWPFWVSPQRVRLPFSKDCMAFAEEVRAALHDAGYFVDVSDTDDTIQKKIRNAQVAQVNYMLVVG  
KQVEAERKVNVRTRDNVVRGLKSIEEVLAEFDELKRTKAREEIAVPGAAAAAAAATD

>Malawimonas\_jakobiformis@prot\_9

MYSVLLSVRAILPRHVRMASRWSKVEMGPADPILGLTVAFKNDTSPNKNVNLGVGAYRDDNGKPYVLPVREAEKRL  
DADHEYAPIGGLPGFTKAAATLTFGDDSAPLREGRIATVQTLSGTGALRTGDFIRRFGLAMPVYMPQPTWPNHKNIA  
RDSQLGGVKEYRYFDKTKGLDFAGLKSLSAAPNGSMVLLHACAHNPTGVDPTQDQWVEISRLCKDKQHFVFFDSAY  
QGFAGDPDRDFAFAVRQFVRDGHVVAQSFANFLYGERIGFAFHIVTGSDEKAEILLSQLRILIRPMYSNPPTGARI  
VETILTDKGLTAQWHKDVKLMADRIGMRQALVDGLKQAGSKQDWSHITKQIGMFCYTLGLSTEQVKKMIEKHHVYM  
TADGRISVAGLTSKNVQYVANALYDVTKA

>Malawimonas\_jakobiformis@HslVU

VLLLVPATMWRRTLLFTVSVFRTPHTFRCSSTRPQELFPREVVAE LDKCVVQEDAKKAVAVAFNRNRWRRLHIDESMK  
GEVIPKNILMIGPTGVGKSEIARRLAKLTNAPFVKVEATKFTVEVGFYGRDVTIHDLDVAAIKDCHDRAKDALRGQVN  
SDIEKALVDKLAGPDARATTRESFLHMLRQGHLLDREIDIEXXXXXXXXXXXXXXXXXXXXXXXXXXXXXXXXXXXX  
XXXXXXXXVSEAKKVLIEDSLIEQKVTQEQQVGDALRSVQEDGVVCIDEIDKIVVREDSRNHSNASDEGVQKDLLPLIEGTT  
VNTPYGPDVTSKILFIACGAFHSCKVSDMLAEQGNFLPIRVTLQPLSENDLVRILTEPRSSLIKQCALLATEGVKLFTE  
DGVREIAKVAANVTQVENIGARRLFTVMERVLEETNFNCNCDTLRGQEVVNAEFVRKNLRLDLERSTDLKFFIL

>Malawimonas\_jakobiformis@Hsp78

MFNRVARSLIRVGRVIAGLPKPMIATTERQLGFVLGRVAVTPRVSGLFSSTFSSSRLHHTTPMRFAATPGQPEPYISPDALP  
TGEALRKYGRDLTEAAKRGQLDPVIGRDEIRRTLQVLARRTKNNPVLIGEPGVGKTAIVEGIARRIANGEVPEVSKNK  
RVIQLDLAAMLAGAKYRGEFEERLKSVLKDVTDKGEVILFIDEMHTLVGAGSAQGTMDASNMLKPALARGELHCVG  
ATTTAEYRKYIEKDAALARRFQPVVPEPSVPETIALLRGLKEKYEVHVGVRIMDAALVFAAVNAHRFISERFLPKAI  
DLVDEAASRLRMQAESKPEVIDSLQREVTLRIELEALKREPDPTAKRAREVEEVKVKQAE LDRLNVRVWQEEERQAL  
AKQKEVKRQLDQARSEMQLASRNGDLARASELMYATIPRLEKEAQALSEVPLTMSDAVRPKDIAAVIARATGIPVEN  
LMMDEAEKLLHMEDQLRARVVGQEALQVSDAVRLSRAGLHAHTRPLGSFLFLGPTGVGKTELCKALAEVLFVGD  
HAMTRIDMSEYMERHSTSRIGAPPYGVYEEGGTLTEAVRRRYPQLVLFDEFKAHREVLDGRLTDSQGRVDFRN  
TLIIMTSNIGADALALPEGKPSAAKDAVMSAVRRTMAPEFINRIDEIVLFRNRLERSVMADIVNVQLRGVAKLLEEKNI  
LLDVTPAARKWLAEQGYDPVYGARPLKRVIQNLNPLARKIIEGSLPQQSAVKVDVDRDGAVDISVAVVESQONEK

>Malawimonas\_jakobiformis@mHsp60

MQRFARLATSSPIRNLPIGRISASTRQYANGKEILFGSEARKRMLGGVKNLADAVQVTLGPKGRNVIIDQSFQAPKITKD  
GVTVAKNIEFRDRYENAGAQLRQVASKTNDTADGDTTATILARYILAQGCCKSVEAGLNPMDFRRGINAAIDRVV  
LKKRSIEVTTKQIRQVATISANDEKLGELIANAIEKVGKDGAITTQDGRTLNDELEIVEGMKFDGRYISPFVDTKTQ  
KCEFENPILLDKKVSNTLGLVKCLEYTPQNRPLIIAEDVDGDALATLVVNRRLRAGLKVCAVKAPGFGDNKRNKQ  
HDIAATTVGAQVISDDVGLKFDTTNFEQVLGSAKRVTISKDDTIVFGGSLPEAISERIEQLRDAIKQTTSDYEKEKLQER  
LAKLTGGVAVIRVGGATEAEVNERKDLVTDALHATRAAVAEGLVPGGGCALLYATRALDDVPTQNFQDKHGVQIVK  
DAL TIPCKTIVSNAGRDGGVVVEHLLSQSSNTRGFNAFADKYEDMIQTGILDPTKVVRTALVDSARVASLMTTAQAVIV  
DLPAEEKAGSAGGAGMGGMGGMGGMGGMGGMDY

>Malawimonas\_jakobiformis@mHsp70

MYSAVRNSLLRRVAVIRSAALRGYAEQAKVQGPVVGIDLGTNTSCIAVMEGTQPRVIENAHGARTTPSVVAVLQDQGV  
LVGAPAKRQVATNPTNTFHGVKRLIGRRFDDPMVSKQSMVGYKIVRADNGDAWVEAHGKRYSPSQIGAYVYLQSMR  
ETAKEHFHPIKNAVVTVPAYFNDSQRQATKDAGRIAGLEVHRIINEPTAAALAYGIKEKDAKIAVYDLGGGTFDISILEI



QEGVFEVKATNGDTFLGGEDFDARLVDFMANEFQKENNMDLRKDKIAVGRLREAAEKAKIELSSVMQTDIQLPFITAD  
ASGPKHLQMTLTRSKYSELVDDLLKKTLEPCRCQLKDAGVQPTQLKEVVLVGGMTRMPKVTEIVRGLFGKEPFKGVN  
PDEVMAGAAIQGGILYGDVTVGVLLDVTPLSLGIETMGGVFTRLINRNTTIPTRKAQVFSTAVDNQTSVEIKVFQGERE  
LAMDNKLGSFLLSGIPPAPRSVPQIEVVSFDIDANGICNVSAKDKDSGRQQITIKSSGGLAEDDIKRVMAEAEKMRRAAD  
LKRKEAIEARNEADTNIYAMERLLAEHKDKLTENDKEQARREITELRTAMEADDAKAIKEKVSALQATQTRLYHAAY  
HAGKQQGGDQQQQQ

>Malawimonas\_jakobiformis@mrl3

ARQRAALITKIEDLTEELKARQKVGGIVQHKYIPLASAWTPKSRRRVGAIIVKAGMLTLEDDWGARFPVTVTKTQEKE  
GYTALQVGATDMRPQKACCYLSVTKPMLVHFQKWNVTPKRTLEFRVTPDALLAPGTRISARHFVPDQYVDVTGITK  
GKGFAGPMKRWFGGGLPASHGVSVSHRSHGATGQRQDPGKVFKGKKMAGHMGVEQRTVQSLRVVKIDPKRDLIYV  
GSPVGPVKGYVRVKDSIRRRFTYSMPPPFTVPPTSETAESMPDEVVGAAGSDPFVRDVEE

>Malawimonas\_jakobiformis@mtif2

LQKATTVSWRGTSPRPTSGSQKSDATSTFKQPVARTSNERIINIGDTIIRDLAQNAGVRVVDVLKALILGEVPRSATSII  
SGDSAELALEEITARKWTQNKLIANRVTERDDVKRQYTRERILQDVAAGKTYPPRAPVVAVMGHVDHGKTTLLDAL  
RRTTVAHEAGGITQSIGAFSVAATPSQTTRSVTFLDTPGHEAFTAMRRRGGALATDVAVLVVAANDGVMPQTLDALRHI  
REANVPFVVALTDLVDASRIEEVKDMLGAQGVVTEDRGGDVQTEISAAAALXXXXEGLNSALVEAVLLQAEVAG  
NCMAPVTGRAEGVXIEARNDKQQGAVISAVVTAGTLRRGDVVVVGRAWGRVXXXXXGVPVVAEAGPSTPVDIVGLK  
ELAAAGDEVVVVXXXXXXXXXXSAYRGAKEMLVILKTDVHGSLEAVTEALENAHKPSTEVIALRVTSVAVGAVSEADID  
LAAATKARVLAFNKVPATVQAAARMHNVPIHSYSIHYALVXXXXXXXXXXXXXXXXXXCVQGVADVAQLFPTRDRK  
GTVTGHAGCRVIDGTMKKGAHIRVKRDGAVIWSGSMASLRHFREDVPKVVXKGQECGILLDGFADLRVGDITETVETV  
QRARTLDE

>Malawimonas\_jakobiformis@nad10

GARIPQIQNAVVPATRQATSSPTATAPQGTTLQEVGAGAPRKYDSLMLLEKPKNGAEYVVSKLNDLINWGRKSSMWPM  
TFGLACCAVEMMHTAAPRYDLDRFGIVFRASPRQSDVMIVAGTLTNKMAPGLRKVVDQMPEPRYVVSVMGSCANGGG  
YYHYSYAVVRGCDRVVVDIYVPGCPPTAEALLYGLLQLQKKIARQRTLLAAYRK

>Malawimonas\_jakobiformis@nad11

QLLVRSCRQVGSPLAAAAPAVKTVKMFVDGREVEVDASVTVLQACAVAGVEIPRFCHERLSIAGNCRMCLVEIEK  
SPKPIASCAMPVSPNMKVYTNSEKTKKAREGVMEFLLMNHPLDPCPIDQGGECDLQDQAMVFGKDRSRFHEYKRAVE  
DKNIGPLVKTVMTRCTHCTRCVRFAAEIAAGVEDIGMTGRGAESQIGTYVEKMFDESELSGNIIDLCPVGALTSKPFVAFAR  
SWELQRTESIDVLDVAVGSNISVDTRVGEVVRILPRVNDVNEEWLSDRSRFAYDGLKRQRLNSPMVKVNGKLVVVTW  
KEALEHIRDQLRGVPGSNIQALVGLSADAESMIALKDLLNRLGSENVCECREDGMRVDPGLRSSYLTNSTIQKAEETDLA  
LLIGSNPRVEAPLFRTRLRKAFLYNDALITYIGPKAELTYQSHHLGDNIGILKDIVTGKHPLAGILSQAARPMVIGAAAL  
RRADAESIQTLYRELTARCPALVQPGVWNGINVLHTAASRVGGLDLGMVPGPAAASAPTSGARVVYLLNADDFENLPE  
NAFTIYQGHGDKGASAADVILPGCAYTEKDATYVNTTEGRVQRTKRAVGPFGDAREDWKILRALSDVGLVRLPYDVT  
SQVRERLADVAPHFARVEHIEPTVVQPSLRASAVALDASTPVASGLINFYMTDPISRNSVTMSKCTA

>Malawimonas\_jakobiformis@nad7

MQSRNFTVNFQHPHAAHGVLRLELDGETVVRADPHIGLHRGTEKLEIYKTYMQALPYFDRLDYVSMMSMEHGY  
TMAVEKLLGVEVPRRAQYIRVLFLELTRIMNHLLAVSCHALDVGAMSPMMWAFEEREKLFEFYERVSGARMHAAAYIR  
PGGVSMMPVGLCDDIYHFQKQPSRIDEMDEMLTGNRIWKQRLVDIGVVTAQQAQDWGFTGVMLRSGVWPDLRK  
TQYEVYPELEFDIPVGTGKDCYDRYRIRMEEMRQSVRIIEQCLNKMPEGPVKTADAKVVPPSRQDMKTSMEALIHFFK  
LYSEGFSVPAGETYAAVEAPKGEFVYLVSDGSSRPYRCKIRAPGFFHLQGLDFMAKGHMLADVVTIIGTQDIVFGEVD  
R

>Malawimonas\_jakobiformis@nad8

QKLASVTPITVQSKSAVFAVSRREMSSTKMSDKERIRNFQPKERTLKHLLDWSAQTFLITELWRGLFMATTIMFEPKVT  
LNYPFKEGQLSPRFRGEHALRRYSTGEERCIACKLCEAVCPAQAITIEAEPREDGSRRTTRYDIDMTKCIYCGFCQEAEP  
VDAIVEGNFEYSTETHEELLYNKDKLLANGDRWEVELAHNVQANFLYR

>Malawimonas\_jakobiformis@ndufv1

MLTRVLSLARVGLRAPAEKTTYGPLKDQDRIFONLYGDSHGVDGWRLKGAEKRGDWYRTKDILGKGVDWIVNEMKA  
SGLRGRGGAGFPGLKWSFMPKPTDRPQYLVVNADEGEPGTCKDREIMRQEPHKLVEGCLVAGFAMRARAAYIYIRG  
EFVLEADRLEAAIQEAYAGLLGPNACGSGFPFDVYVHRGAGAYICGEETALIESIEGKQKQKPRPKPPFANVGLFGCPT  
TVNNVETIAVAPTILRRGASWFTSFRKNNSGTKLFCISGHVNTPTCTVEEEMSIPLKELIERHCGGVRGGWDLNLLAIPGG  
SSVPLLPKKICDTVLMDFDALRDVQSGLGTAAVIVMDKSTDVIQAIARLSKFYKHESCGQCPTCREGTGWSAMMERM  
VKGDAMVDEIDQLEELSRQIEGHTICALGDAAAWVQGLIRHFRPEMEKRIASFQKKGPSAPKQGPVHLLH

>Malawimonas\_jakobiformis@ndufv2

SSGSLFVHRDTEENNEKTPFEFNADSMKIQITILKKYPSHYKRAAMIPALDIAQRQNGGWSLNLAMNRVADLLGVARM  
RVYEVATFYTMFNRPVKGHFVQVCTTTPCELGSGQVLDALRDHLKIDVGETTPDKKFTLIEVECLGACANAPMMQI  
NDDFYEDLTPQTAVAVVKALAEKGQPKVGPQNGRVTCEPLGKRTSLTDMASAGPTAPNLDK

>Malawimonas\_jakobiformis@nsf1

MLALRRLGGNSGVIRRLVRHASAKNSNADELLGRPIYLDVQATSPMDPRVLDAMLPHYFTEFGNPHSRTHAYGWESER  
AAEEAREFVGAIGADAKEIVFTSGATESNNMAIKGVARFYKAQKKHVITQTTEHKCVLDSCRALEQEGFDVYTLVPVQ  
KSLVDLQELSAIRPDTSLVSMGVNNEIGVVQPLADIGSLCRKKGVFFHCDAQAQVGIPLDVNQMKIDLLSISGHKI  
YGPKGIGALYVRRKPRVRLPELQSGGGQERGMRSGLTPTLVVGLGAACRLILEERDNDVRHVQQLSKYLFQDITKRIP  
HVHLNGDLVQRYSGNLNFSFAFVEGESLLMALKTCVSSGSACTSASLEPSYVLRALGVEEELAHTSIRIGIRGFTTKRE  
VDYFVDLLEKSVARLRELSPLWEMYNEGIDLKSIAWAAH

>Malawimonas\_jakobiformis@odpA

SARTAPAARMQISQRGMAAAADEVTYELPEQMFAYHKFEQRAPKTTVVQKSDLIQYFKTMALYRRVEMQSEDLYRN  
KFIRGFLHVYTGQEAFLVGVSEAVLKPTDSAITA YRDHCHYLARGGTVRACLAELMGRYDGCAGKGGSMHMYHKPG  
NFYGGNGVIGAQPVPVAGIAFAHKYRGDGGVCVASYGDGAANQQQLFEAYNMAMLWKLPAIFVCENNKYGMGTSV  
ARAAANYEFYTRGDFVPGIKVDGMNVIAVREAMRLATAHARTQGPPIVEMETYRYSGHSMSPDGLSYRTREEVAEYRR  
TRDPIEFVKGLLQYQGWMTAEIEKAVEKQIRDEVEEVANDLQAPYPPAEELYKDIYAP

>Malawimonas\_jakobiformis@odpB

MLRVTASLPRRLAQAHRLFALVRLQSTDAAPKKVQVREALAMAMDEEMERDEKVFMLGEEVGAINGAYKVSGLF  
AKWGEKRIIDTPITEMGFAVLAAGLAGLRPICEFMTFNFSMQAIDHVNSAGKALYMSGGQLHCPVFRGPNGAAR  
AVAAQHSQDFSAWYGSVPLKVVAPWNAEDAKGLLKAIRDNPNVFLENEIMYGEQFELPASVQSKDFVLEIGKAKI

ERVGTSVTLTAFSRMVGVALQAAEILSKEHGIEAEVINLRSIRPLDRQCIVDSVIKTNRLVSIIEGWPPQYGVGAEISASVM  
ESAAFYDLADAPILRVTVGADVMPYPSQHLLEAAALPSIAMIVDAVKKVCYKK

>Malawimonas\_jakobiformis@PCCB

VGFHSRMNMHRLLQRLPAARAARFRPLVALSSARPLVAARFAHAAPAETQISDVRQEIRKLKEQAVLGGGEQRIAAQHK  
KGKLTARERLELLDEGSFNEIDALVEHRCADFGMGKQKYPGDGVVTSVGTIHRPVPVFSQDFTVFGGSLSETHAQKI  
CKIMDKAMLVGVPVIGLNDSSGARIQEGVASLAGYAEVFRQNVDSAGVVPQLSLVMGPCAGGAVYSPAMTDFIMMV  
KETSVMYVTGPDVVKVTMETVTHDELGGARVHTGKSGVAHLAFDNDIEAMXRTRELFDFLPLNNRDGVPERYTADP  
XDREEPYLDYIVPKDPNAPYNNMLEVITKVVDDGNFLEITQDFARNILVGFARMAGRTVSIVANQPKEQAGVLDIDSSVK  
GGRFVRFCDAFNPIITFVDVPGFLPGTKQEFNGIIRHGAKLLFAYAEASVPKLTVITRKAYGGAYDVMGSKHLRADVN  
YAWPNAEIAVMGAEGAANIIFRGDADL.PARVAEYKARFANPLAAARRGFLDDVIVPSQTRKLLIRLDELLKHKKEYEGV  
PKRHNNLPL

>Malawimonas\_jakobiformis@sdh1

NTKPQKGQHRMSSYPVVDHTYDVVVVGAGGAGLRAAFGLANSYKTACITKLPTRSHTVAAQGGVNAALGNMGR  
DDWRWHMFDTVKGSDDLGDQDAIHYMCREAIPAVVELENFVGFPSRTEDGRIYQRAFGGQSLDYGKGGQAYRCCAA  
ADRTGHAILHTLYGQSLKYNTYFVEYFALDLIMENGECEGRVLAALCMEDGTLHRFRAHKTILATGGYGRAYFSATSAAH  
TCTDGNAMVVRAGLPCQDLDFVQFHPTGIYAGCLITEGARGEGGILLNSLGERFERMERHAPTAKDLASRDVVSRAITI  
EVREGRGVPLKDHVYLQLHLLPPDILHARLPGISETAAIFAGVDVTKPEIPILPTVHYNMGGIPTNYMTEVVTLKDGPN  
DHVVPGLMAIGEAACVSVHGANRLGANSLLDIVVFGRAAVQQVQNTLKPAPHRPLPADAGEESIANLDRLRHANGA  
STPAEVRMRMQTKMNYAAVFRQTSTLEEGVKKIDEVYQEHKDLKLSDRGLIWNITDLVEALELQNLMTQAVLTLHSA  
ENRKESRGAHAREDFSTRDDVNWMKHTVSWLDDVDSGKVKLDYRVPVKMTTLDSEVSPFPQARKY

>Malawimonas\_jakobiformis@sdh2

MIRIWRSSAVAPLLRQVGPASAAAAAGPFKTEAKEAPQATAVKPKDVRKFQIYRWDPERTEKPRVATY EIDMNE  
CGPMVLDALLKIKNEVDPTLTFRRSCREGICGSCAMNINGANALACLKVDASVMKIYPLPHMNVIKDLVPLDITTFYK  
QHASIKPYLMQKQPEQGSNLQSPADREKLDGLYECILCACSTSCPSYWWNGEMYLGPAILLQAFRWISDSRDQFT  
RERLEALNDAYKLYRCHTIMNCTRVCPKGLNPALAIKIKKQIAELP

>Malawimonas\_jakobiformis@SUCLG1

MFSRIGRALLQAPRSVILACRTYASEAPLPTSAPYVFDVDRSTKVICQGFQTKQGTFTTQQAIEYGTKVVGVPKGGGS  
SHLNLVPFNSVSEAMKATGANASSVYVPPYAKGAIMEAIEAIEPLIVVITEGIPQHDMAVYKHALRESGKTRLIGPNCP  
GIKPGCEKIGIMPGHILPGRIGVSRSGTLTYEAVAQTTANKLQMFQSTCVGIGGDPFNFTNFVDTLRLFMNDPQTEGILLI  
GEIGGTAEEEEAEFIRQNHKKPVAAFIAGVTAPPGRMGHAGAIISGGKGTAAQDKIKTLKQCGVVVSEPAKLGDAML  
QAMKQFGKA

>Malawimonas\_jakobiformis@tufA

IVRGMKAFERVKPHFNIGTIGHVDHGKTTLTAATKVLADEGKARFMDFDQIDKAPERQRGITIQTAAHVEYETQKRHY  
SHVDCPGHEDYVKNMITGAAQMDGAILVVSADGPKPQTRHILLARQVGVNLLVFLNKVDLVEDQELLELAEEV  
RDLLKFYKYPGDEIPVIRGSALHALKGTDPKLRDAIMKLMDSVDTYLPTPPRAVDKPFMSLESVLSISGRGTVATGRI  
EQGVKVGEEIEITGFSAAPIKTTVTGVMFKKELDRGEAGDDVGLLRGVSREQLRRGMVLSKPGTVKTHKKFEAEI  
YVLEDEGGRTPFMNRYRQVFRVADVTGAVTLPQGTVMVMPGDNIRLTFDLQYPMVLAEGVRFVAVREGNRTVM  
SGVVTKVL

>Malawimonas\_jakobiformis@TypA

MSFFRVMQSRVHADGIRNVAIAHVDHGKTTLVDTLRQSGTMDKLDGGERVMDSDNLERERGITILAKVTAVNWNKD  
RINIVDTPGHADFGGEVERTLSMVDGVVLDVDALEGMPQTKFLAKALQRRLRPIVNLKNSDRPTARHSEVESELDL  
FCALDCTEEQLDFPVLASAKEGWAVRNQDKRESMHPLDITIVQKVPAPLVANAPFMSMLVTTVEREQYLGKILTGR  
VYSGQVRVNDRVKGMTRTGAQKEEGRVMKILQRSGLSRAPIELGTAGDIISISGLTQSTVGDITAAIDLADPIPAPIDPP  
TISMNFGANDSPLAGREGKLLTSALIGERLRGEAEVNAIQIEPMEVYEVVGRGEMQLGVLIENMRREGFELSVPSPV  
VYQTSSETGEKLEPIEVTIDVDQEFVGVVIDKMLVRKAEMVDSREVAGKTRLRFLVPARGLIGYKSEFSTDTRGTGMH  
YGFHSGPYKGPINNVRKGVLSMADGVTTYALKALEDRGVMFMGAGVCSYGMIVGEHTRDSDLVNPRVRAKLL  
TNVRSPTSDEAVARLSPRLMSLEEAIAYVKPGEVVEVTPKNIRLRKGMMDLSKRRATDRAERKAQK

>Malawimonas\_jakobiformis@CLPP

FRICMSSIIIFRSIMKRLSATFVRPMHFSRTFSTARTTRSVIPMVIEQSFRRGERAFDIYSRLLKERIVFLHGEVTDDESSLV  
VAQLMFLAEADPSRISMVYINSPGGLVITAGLAIYDTMQYIRSPVHTLFCFGQACSMASLLAAGSTGNRLVLPNSKIMIHQ  
PLGGTSGQASDIAHAEIELETRARLN

>Malawimonas\_jakobiformis@Coq7

TVQEMADQERAHYEKFADLARERRVRPTVLQPFWKMAGFAAGAATALLGDKAAMACTVAVEEISEHYNDQLRDLL  
SHGLNOREGELFETVRQFRDDELQHHDIGLAHGARETPAFNLLYESIKAGTKMAVWLSQRV

>Malawimonas\_jakobiformis@ETFDH

MFSRVLQAARRLQPRFGSVRSFSDAVDPRLEPRASEDFDVVIVGGGAPGLSAAIKLKQLSQASNKDLRUCVIDKAAEFQ  
RHTLGAVIEPRALNELIPDWKEKGAPLDPATSDKFFYLTEKRAFRLPTPPTLHNDGNVYVLSNVVRWLATQAEAG  
VEMYPGFAEAELYDDGRVGVATGDVGVGKDGKLDKDSFTRGMELRAKAVTLMAEGCRGSLSKQIIRFDLQOGRIQT  
YGIGLKELEWVDPSPVCPQGTILHTLWPLQHDVYGGSHLYHMKPNLISLGFVGLDYTNPYLNPYREFQRYKTHPLIRT  
VLENGTCVGYGARAIVEGGWQSIKLVFPGGALIGDAAGFVNVPKIKGTHNAMKSGMLAAECVFNALQGTGSLEAYD  
SALRESWVGEELYAVRNIRPSLHYGFLSFMAISGLETMITRGKIPITLQHHVEDHKSCLKPKDACTPIEYKPKDGLTFDLL  
TNLTRSNVNHEEDQPAHLKVLDPAPVERNLKVYGGPESRFPAGVYEFVDDTATGKPRQLQINAQNCVHCKTCDIKDS  
NINWTVPEGGGPAYSNM

>Malawimonas\_jakobiformis@ndufa9

RGIAFKQITPGTRPTVAGVPVTVFGGTGFVGRYVVAIGKTSQIAPYRGEDEMSVRHLKVNGDLGQIIPVPHPLKPETI  
AQAVEKSAIVINLIGKNYKTNYSFNVDVNNIPAMIAHVRCKEAGVHRLIHVSALAASYDAPSEFARTKARGEDAVREE  
FPEATIVRPATYGHEDRFITKETAATAKSLKWYPIIAGHLLTQPTYVVDVAAAVALQIARDGDTQKQVYELAGPTVYERG  
KLLREAFEVAGLWTSKAFNLPAHLALPAGFANELLLPFEPFWRDILRQLSQDIVKRDDALGYEDLGLVDPDSFEKHAFT  
LLRRFRPP

>Malawimonas\_jakobiformis@ndufaf5

MWRRLHRVVSANTGCNPARRGFATEEDSVNFDRNYKRIQRNRIARMHAEYEFRLNRVADTLDRLTDIPRQFPAV  
LDLGCNASNLRHLRDRGVSVKTFIQTDMAEEMLELYREEDANHPSIDVHRVHCDEEFLPFQNSKFDLVISNLSLHWVN  
DLPGVFTQVRNVSKPDGAFIAGLGGSTLRELRSFVVAESEREGGISRRMSPLADAPDVGNNLTRAGFNLPVTVDETITI  
NYGSPFSLMHELMMGEANA VNSRQMNLSDVLTATASAYNALYQNEDEGSVPATFQV

>Malawimonas\_jakobiformis@NifU

CRIPACALVAAQRGISSVVOPIAVRSAITRIESFPQPIVTAKRTLFVRVETTPNENSLKFLPTGRVVLESIGNIEFHSPRENT  
 QKSPLAKQLFSLEGVQSLLSFHEFVTVTKDDSVIEWDILKPNVFAATIMDFYDSGAPVFTDEMPVTDTTILPEDDDVVAAIK  
 EIVEMKIRPVVLRDGGNILFRGFIDGYVHLQLTGACSTCSSKATLYNGVENMLMHYVPEVKGIKQVEDEAEKVGNEEF  
 SELEKRLDRAKSVSA

>Malawimonas\_jakobiformis@PCCA\_

MQRLVQAVVRQSVSSAAAVQARNASTTKYFDKLMVANRGEIACRVFRTAKKLGIRTVAVYSEADKEAVHVQMADEA  
 VCIGPAPTNQSYLNMDAVLAAARKTGAQAIHPGYGFLSENADFSQACRDNKIAFIGPPPEAMYKLGDKIRSKQLARAA  
 GVSTVPGYAGEVNSEAEAIKISREIGYPVMLKASHGGGGKGMRVAWNDDVNLNFQISREEAKSFFGDDRLLEKFI  
 PRHIEIQVLADQOGNILYFPERECSLQRRNQVVEESPSVALDENLRRMLGEOAASLAREVGYFSAGTLEFLDKHKKF  
 YFLEMNTRLQVEHPVTEYITGYDLVEMMIMVAAGHPLPIKQSDIKINGWSMETRIY AEDPLKGF LPSIGLTSYREPEAA  
 EGLRIDTGVREGSEISVYYDPMIAKVV AHGSRNEALDRLR TALDSFVVRGVTHNVNFLRSVLDHPRFQRADLTTKFI  
 DEYPKGFVGHPLNAKQIKQLIASSAVMHMMRVERNNTISDRMESAPIPKLQLVVEVAGKQYEV MVARDPAADELSS  
 DSYAVGIATEVKSMEGAHEEPVPSVAAAAKDAEPVAAAHEHENGDEHVFEVPEWDVDSTLFRFMLGDESPVVLQ  
 MVRATPTGFRIQHIGSNYDVKVMSKLEAKLMPYMPEKKAMDTSKMLLSPMPGALRHVYVNVGDQVTMGQPLAVVE  
 AMKMQNVLRAVAPGKVKKILHQPGAILQPDEVIMELE

>Malawimonas\_jakobiformis@PET112

MISRKWLTVGLEVHARIKAATKLFSGAGTDVSARPNSSQVGFDDAAVPGTLPVLNRECVMQAIRTSVALQGHVALRST  
 FDRKHIFYHDLPHGFQITQKFTQLMRDGLHVAEPKGPSKTIGVKYLQLEVDSGKTIHDLSPQFSYVDLNRAGAALMEI  
 VTEPEIRTPGEAASFVRTLQSLLRHIGTCDGNMQDGLRCDVNVSVHAADGSRHSRPRVEVKNLNSLRAISKAIEFEYNR  
 HVRALES AHGAEADLVQETRMFDANS GTTRMRTKESA WDYRFFPEPDLPLLITQIRQSLPPTPEQMAEELVAQTGI  
 SAADARLIVADPDSLRFK EASSGRS AKK VANW LISDLYGLLNQDDLSV SQCPVTPQQLGSLVDVIESGSVTVSLGKDIL  
 HRMFHGDRTTAQDIASAEGMIVVQDEAAIRTLCKEIVANPAEVAKYIAGRKNVFGFFVGLAMKKTNGRANPTLVNA  
 ALTEILARQKAAAASLAEGRSQ

>Malawimonas\_jakobiformis@UQCRC1

LRAVSRVARRAVDSVRHASDTAVSTLPNGLRVATEEKLGETATIGVFIDAGSRYETE QNNGVAHYLEHLAFKGTKTRT  
 QHQLELEVENIGGQLNAYTSREHTVFLAKVLKDVPRAVDILGDIIQNSTYPADRVEAERSTILREMEEVERNNEEAVF  
 DRLHESAYQGTPLGRITLGPENIRAITRDDLVNFVQTHYTAPRMIVVGAGAVSHQQLTQLAEKSFGLPSKAATPISKL  
 PCKYTGSDILVQNDLGLTHVAIAVQGVGWAHPDAL TLMVMQSI VGSWDRNAV GARHVSSKLAGEITRYDLARSFKS  
 FNTCYTDTGLFGCYAVXQRVDDHTLDDL VYSIENEWVRLCYDVTEHEVERAKSQLKASFLMGLDGT TAVVEDIGRQL  
 LVYGRVPQRELLARIDAIDVNAVKR VASTYIYDQDPVMAMVGD CNMAPDYNRIRK WTHWYRT

>Malawimonas\_jakobiformis@UQCRFS1

SSSHGHGHGTVA VVPSKARRAAAGLFLASGGCVPSFSVGRVDMSTRLTRSFASAAGPESGYEGGEQATARSNVGGDP  
 AKRTFAYLVMGSSAFLYAAAIRSTVVDFVQTMNPSADVLALASIEIDVGKIPEGSGIVAKWRGKPVFIRHRTQDEIEAAR  
 AVPLSELKDPQDDSA RTKQPEWL VVLGVCTHLGCVP MAGQGEYGGWFCPC HSHYDISGRIRKGPAPLNLEVP PYSFV  
 DGGAKIRIG
